# Supplementary material for: Adrenocortical Carcinoma Steroid Profiles: In Silico Pan-Cancer Analysis of TCGA Data Uncovers Immunotherapy Targets for Potential Improved Outcomes
Source: Front Endocrinol (Lausanne). 2021 Jun 14;12:672319. doi: 10.3389/fendo.2021.672319 (PMC8237859; doi:10.3389/fendo.2021.672319)
Supplement: Supplementary file 1 [file Table_1.xlsx]

## Sheet: Sheet1
Differential Expression LSP x HSP Results
GENE_SYMBOL	baseMean	log2FoldChange	lfcSE	stat	pvalue	padj	qvalue	FDR
ABI3BP	1735.69	4.79021	0.324121	14.7791	1.99901e-49	3.75694e-45	2.21421e-45	3.61747e-07
SHOC1	1110.19	-6.16756	0.452236	-13.6379	2.38304e-42	2.23934e-38	1.31979e-38	3.61747e-07
LMX1B	190.352	-7.35605	0.557214	-13.2015	8.60237e-40	5.3891e-36	3.17614e-36	3.61747e-07
SV2C	356.527	-6.26306	0.487997	-12.8342	1.0548e-37	3.96479e-34	2.33671e-34	3.61747e-07
FARP1	5492.35	-2.50079	0.194691	-12.8449	9.18213e-38	3.96479e-34	2.33671e-34	3.61747e-07
CHRNA4	482.057	-7.11116	0.555173	-12.8089	1.46154e-37	4.57802e-34	2.69812e-34	3.61747e-07
NSG1	1875.38	-5.97433	0.478273	-12.4915	8.31068e-36	2.2313e-32	1.31505e-32	3.61747e-07
ACSL5	369.163	2.82141	0.229952	12.2696	1.31955e-34	3.09996e-31	1.82701e-31	3.61747e-07
ABCB4	2354.88	-4.83799	0.40126	-12.057	1.78171e-33	3.72061e-30	2.1928e-30	3.61747e-07
SYTL2	2350.94	-3.73958	0.311237	-12.0152	2.95574e-33	5.05001e-30	2.9763e-30	3.61747e-07
RELN	920.493	-6.10925	0.508402	-12.0166	2.90776e-33	5.05001e-30	2.9763e-30	3.61747e-07
PCP4	3925.49	-6.47593	0.545239	-11.8772	1.55405e-32	2.43391e-29	1.43446e-29	3.61747e-07
KAZN	1674.08	-3.08913	0.263827	-11.7089	1.14725e-31	1.65857e-28	9.77504e-29	3.61747e-07
WNT5B	236.731	3.52185	0.302885	11.6277	2.98141e-31	4.00233e-28	2.35883e-28	3.61747e-07
SERPINI2	63.3129	7.94048	0.686641	11.5642	6.25472e-31	7.83674e-28	4.6187e-28	3.61747e-07
F13A1	1487.89	4.32664	0.378184	11.4406	2.62197e-30	3.07984e-27	1.81515e-27	3.61747e-07
KLRB1	54.6646	3.47196	0.310209	11.1923	4.44707e-29	4.91637e-26	2.89753e-26	3.61747e-07
IL10RA	465.172	2.66139	0.238652	11.1518	7.02091e-29	6.94479e-26	4.09301e-26	3.61747e-07
TESPA1	50.2357	4.42012	0.396291	11.1537	6.86663e-29	6.94479e-26	4.09301e-26	3.61747e-07
KDM4B	3797.42	-1.49662	0.134897	-11.0945	1.33382e-28	1.25339e-25	7.38707e-26	3.61747e-07
PDE2A	9585.94	-4.1411	0.374688	-11.0521	2.14117e-28	1.91625e-25	1.12937e-25	3.61747e-07
GZMA	111.309	3.6268	0.329518	11.0064	3.56025e-28	3.04142e-25	1.79251e-25	3.61747e-07
MMRN2	3180.78	2.32294	0.212201	10.9469	6.87802e-28	5.62024e-25	3.31237e-25	3.61747e-07
CSF1	2103.09	2.87832	0.264277	10.8913	1.26824e-27	9.93136e-25	5.8532e-25	3.61747e-07
RCSD1	352.766	2.03143	0.18713	10.8558	1.8726e-27	1.40774e-24	8.29674e-25	3.61747e-07
UGCG	10048.1	-2.73185	0.252531	-10.8179	2.83285e-27	2.04772e-24	1.20685e-24	3.61747e-07
MSC	852.452	4.10911	0.380802	10.7907	3.80993e-27	2.65199e-24	1.56299e-24	3.61747e-07
CASP1	448.032	2.69695	0.251516	10.7228	7.95998e-27	5.34285e-24	3.14889e-24	3.61747e-07
PLPPR1	387.726	-7.77147	0.726399	-10.6986	1.0331e-26	6.69518e-24	3.94591e-24	3.61747e-07
FBXO32	1213.2	2.79545	0.261567	10.6873	1.16693e-26	7.31044e-24	4.30852e-24	3.61747e-07
HGF	559.648	4.03776	0.378349	10.672	1.37571e-26	8.34037e-24	4.91552e-24	3.61747e-07
S1PR3	5945.85	-2.69769	0.253307	-10.6499	1.74552e-26	1.02516e-23	6.04196e-24	3.61747e-07
CST7	83.4814	3.1652	0.297521	10.6386	1.97166e-26	1.08986e-23	6.42326e-24	3.61747e-07
XCL1	11.0789	4.0154	0.377425	10.6389	1.96339e-26	1.08986e-23	6.42326e-24	3.61747e-07
SCML4	17.4007	3.77367	0.355695	10.6093	2.69816e-26	1.44884e-23	8.53894e-24	3.61747e-07
PTPRC	344.131	2.79443	0.26391	10.5886	3.36618e-26	1.73357e-23	1.02171e-23	3.61747e-07
FMNL3	1246.9	1.73276	0.163664	10.5873	3.41291e-26	1.73357e-23	1.02171e-23	3.61747e-07
SLC30A10	617.504	-4.73538	0.447858	-10.5734	3.95966e-26	1.95837e-23	1.15419e-23	3.61747e-07
CCL5	525.76	3.29031	0.313058	10.5102	7.75301e-26	3.73615e-23	2.20196e-23	3.61747e-07
SLCO2B1	1113.63	2.63555	0.251917	10.462	1.29099e-25	6.06573e-23	3.57493e-23	3.61747e-07
SLAMF6	40.0578	3.13968	0.300862	10.4356	1.70505e-25	7.67085e-23	4.52093e-23	3.61747e-07
CTSW	76.1133	3.00356	0.287832	10.4351	1.71425e-25	7.67085e-23	4.52093e-23	3.61747e-07
CD69	67.8555	3.32745	0.319282	10.4217	1.97472e-25	8.63089e-23	5.08675e-23	3.61747e-07
IL16	233.692	2.13085	0.204777	10.4057	2.33488e-25	9.97312e-23	5.87781e-23	3.61747e-07
CISH	1054.78	3.33496	0.32104	10.388	2.81221e-25	1.1745e-22	6.92211e-23	3.61747e-07
PTAFR	200.722	2.50788	0.24194	10.3657	3.55143e-25	1.45099e-22	8.55163e-23	3.61747e-07
PLAAT4	351.848	2.89408	0.279663	10.3484	4.25352e-25	1.70086e-22	1.00243e-22	3.61747e-07
CXCR6	48.4381	3.68648	0.35634	10.3454	4.39157e-25	1.71948e-22	1.0134e-22	3.61747e-07
MS4A2	70.0357	6.17936	0.597893	10.3352	4.88251e-25	1.87269e-22	1.1037e-22	3.61747e-07
ENTPD8	96.699	-5.71652	0.553735	-10.3236	5.51386e-25	2.07255e-22	1.22149e-22	3.61747e-07
LAMC2	181.189	4.64737	0.450914	10.3066	6.58212e-25	2.42558e-22	1.42955e-22	3.61747e-07
FLI1	416.299	1.69077	0.164198	10.2971	7.26018e-25	2.624e-22	1.54649e-22	3.61747e-07
ARL11	144.97	3.27377	0.318503	10.2786	8.79793e-25	3.11978e-22	1.83869e-22	3.61747e-07
CSF2RB	106.045	2.37776	0.231755	10.2598	1.06911e-24	3.7209e-22	2.19297e-22	3.61747e-07
CHI3L2	224.665	5.22411	0.510002	10.2433	1.26834e-24	4.33405e-22	2.55434e-22	3.61747e-07
ZNF462	1391.66	-1.27276	0.124335	-10.2366	1.35961e-24	4.56296e-22	2.68925e-22	3.61747e-07
MGAT4A	512.066	1.5906	0.155474	10.2306	1.44579e-24	4.76706e-22	2.80954e-22	3.61747e-07
LILRB2	173.862	2.52731	0.247416	10.2148	1.70189e-24	5.51472e-22	3.25018e-22	3.61747e-07
SERINC2	3942.06	3.23708	0.317175	10.206	1.86473e-24	5.93995e-22	3.5008e-22	3.61747e-07
TNR	173.888	6.50038	0.637135	10.2025	1.93184e-24	5.95197e-22	3.50788e-22	3.61747e-07
TMEM233	236.969	3.65558	0.358298	10.2026	1.92977e-24	5.95197e-22	3.50788e-22	3.61747e-07
TMC8	180.558	2.35578	0.231013	10.1976	2.03187e-24	6.07147e-22	3.57831e-22	3.61747e-07
CD247	60.0337	2.65721	0.260576	10.1975	2.03524e-24	6.07147e-22	3.57831e-22	3.61747e-07
CD4	1010.88	2.63193	0.258907	10.1655	2.82572e-24	8.29792e-22	4.8905e-22	3.61747e-07
FILIP1L	606.721	2.25474	0.221971	10.1578	3.05975e-24	8.84692e-22	5.21406e-22	3.61747e-07
CD40LG	6.98416	3.94783	0.389474	10.1363	3.81165e-24	1.0854e-21	6.39694e-22	3.61747e-07
ANXA3	159.928	4.27523	0.421862	10.1342	3.89647e-24	1.09299e-21	6.44169e-22	3.61747e-07
PYHIN1	23.3152	3.63429	0.359103	10.1205	4.48251e-24	1.23889e-21	7.30156e-22	3.61747e-07
ITK	39.1499	3.28944	0.325859	10.0947	5.83259e-24	1.58866e-21	9.36301e-22	3.61747e-07
APOA1	1244	-6.15158	0.609595	-10.0913	6.0388e-24	1.62133e-21	9.55556e-22	3.61747e-07
TRAF3IP3	57.8209	2.40992	0.239199	10.0749	7.13084e-24	1.88756e-21	1.11246e-21	3.61747e-07
TYRO3	959.83	-2.10271	0.20905	-10.0584	8.43629e-24	2.20211e-21	1.29784e-21	3.61747e-07
GBP5	130.899	3.23888	0.322675	10.0376	1.04187e-23	2.64606e-21	1.55949e-21	3.61747e-07
MBP	275.078	3.14881	0.313695	10.0378	1.03973e-23	2.64606e-21	1.55949e-21	3.61747e-07
CD2	106.337	3.59466	0.358488	10.0273	1.15643e-23	2.89786e-21	1.7079e-21	3.61747e-07
BHLHE22	73.9088	4.77664	0.47753	10.0028	1.4814e-23	3.66336e-21	2.15905e-21	3.61747e-07
CLVS2	589.346	8.09247	0.81013	9.9891	1.70117e-23	4.15217e-21	2.44714e-21	3.61747e-07
ARHGAP30	264.092	2.17404	0.217725	9.98523	1.76889e-23	4.26213e-21	2.51195e-21	3.61747e-07
SH3BP4	3205.02	-1.53503	0.153753	-9.98372	1.7961e-23	4.27289e-21	2.51829e-21	3.61747e-07
C1QTNF8	182.659	7.39801	0.741941	9.97116	2.03834e-23	4.78857e-21	2.82221e-21	3.61747e-07
FSCN1	14932.3	-2.5099	0.251824	-9.96688	2.12818e-23	4.93791e-21	2.91023e-21	3.61747e-07
IKZF3	98.9234	3.27236	0.329631	9.92735	3.16557e-23	7.24615e-21	4.27063e-21	3.61747e-07
GREM2	788.59	-6.16986	0.621569	-9.92627	3.20012e-23	7.24615e-21	4.27063e-21	3.61747e-07
CD3E	134.732	3.42734	0.345923	9.90781	3.8498e-23	8.61347e-21	5.07648e-21	3.61747e-07
MS4A7	652.217	2.51194	0.254015	9.88896	4.64822e-23	1.02775e-20	6.05719e-21	3.61747e-07
CRTAM	14.4895	3.62174	0.366427	9.88393	4.88763e-23	1.06812e-20	6.29511e-21	3.61747e-07
CYSLTR1	51.5033	2.32585	0.235859	9.86117	6.13317e-23	1.32491e-20	7.80854e-21	3.61747e-07
CEL	764.141	3.98855	0.405242	9.8424	7.39251e-23	1.5788e-20	9.30492e-21	3.61747e-07
IL2RB	173.564	2.84377	0.288989	9.84039	7.54189e-23	1.59261e-20	9.38628e-21	3.61747e-07
XCL2	9.95484	4.15524	0.422877	9.82612	8.69006e-23	1.81468e-20	1.06951e-20	3.61747e-07
GPRC6A	43.4023	-6.32219	0.644047	-9.81636	9.57407e-23	1.97731e-20	1.16536e-20	3.61747e-07
CES1	1024.01	6.58532	0.671598	9.80544	1.06677e-22	2.17922e-20	1.28436e-20	3.61747e-07
LCP2	409.515	2.01787	0.205831	9.80355	1.08693e-22	2.19654e-20	1.29456e-20	3.61747e-07
PARP2	1309.6	-1.08316	0.110516	-9.80095	1.11529e-22	2.22986e-20	1.3142e-20	3.61747e-07
MISP	230.105	4.76055	0.486148	9.79238	1.21399e-22	2.40165e-20	1.41545e-20	3.61747e-07
IKZF1	138.803	2.55144	0.260672	9.78792	1.26876e-22	2.48386e-20	1.4639e-20	3.61747e-07
PLEK	263.778	2.55567	0.261341	9.77908	1.38464e-22	2.68278e-20	1.58113e-20	3.61747e-07
LTB	64.9763	3.17371	0.325398	9.75331	1.78544e-22	3.42403e-20	2.018e-20	3.61747e-07
NBPF1	1209.98	-2.07512	0.213129	-9.73642	2.10844e-22	4.00263e-20	2.35901e-20	3.61747e-07
PAG1	258.226	1.98181	0.203752	9.72658	2.32273e-22	4.36534e-20	2.57278e-20	3.61747e-07
PRF1	134.046	2.60289	0.267753	9.72125	2.44753e-22	4.55435e-20	2.68417e-20	3.61747e-07
NAT16	77.4261	-5.87831	0.605182	-9.71328	2.64687e-22	4.87698e-20	2.87432e-20	3.61747e-07
NKG7	191.512	2.72735	0.280862	9.71064	2.71635e-22	4.95641e-20	2.92113e-20	3.61747e-07
RIIAD1	62.6958	4.24926	0.437772	9.70657	2.82692e-22	5.10857e-20	3.01081e-20	3.61747e-07
CST5	887.022	-7.89197	0.813167	-9.70524	2.86414e-22	5.12654e-20	3.0214e-20	3.61747e-07
ZCCHC12	184.411	-3.90774	0.403486	-9.68495	3.49363e-22	6.19427e-20	3.65068e-20	3.61747e-07
CYBB	722.27	2.80649	0.290265	9.66871	4.09494e-22	7.19255e-20	4.23904e-20	3.61747e-07
SH2D1A	26.0429	3.61808	0.374425	9.66303	4.32857e-22	7.53251e-20	4.4394e-20	3.61747e-07
FOLR2	938.222	3.16438	0.327511	9.66192	4.37564e-22	7.54457e-20	4.44651e-20	3.61747e-07
PDX1	36.6608	-6.34289	0.658125	-9.63783	5.53463e-22	9.37098e-20	5.52293e-20	3.61747e-07
IL2RG	206.238	2.74561	0.284855	9.63862	5.49198e-22	9.37098e-20	5.52293e-20	3.61747e-07
PIK3AP1	381.698	2.46731	0.256215	9.62987	5.98063e-22	1.00357e-19	5.9147e-20	3.61747e-07
GNPTAB	1883.04	1.65079	0.171609	9.61949	6.61614e-22	1.10039e-19	6.48529e-20	3.61747e-07
EPS8	898.739	1.77464	0.184946	9.59546	8.35417e-22	1.37726e-19	8.11712e-20	3.61747e-07
PHF21B	90.9228	-4.75457	0.495845	-9.58882	8.91006e-22	1.45614e-19	8.58195e-20	3.61747e-07
HPGDS	93.7299	3.11972	0.325426	9.58659	9.10476e-22	1.47513e-19	8.69389e-20	3.61747e-07
ADH1C	594.84	5.8758	0.616116	9.53684	1.4725e-21	2.36531e-19	1.39403e-19	3.61747e-07
MS4A6A	925.066	2.44978	0.257028	9.5312	1.5548e-21	2.47636e-19	1.45948e-19	3.61747e-07
NCR3	6.60681	3.18273	0.334498	9.51496	1.81792e-21	2.87108e-19	1.69212e-19	3.61747e-07
PARP15	21.4946	2.59592	0.273069	9.50646	1.97261e-21	3.08943e-19	1.8208e-19	3.61747e-07
PLD5	931.786	-4.09795	0.431248	-9.50254	2.04839e-21	3.18161e-19	1.87513e-19	3.61747e-07
EFNA3	1042.21	-2.84362	0.299568	-9.4924	2.25786e-21	3.47821e-19	2.04993e-19	3.61747e-07
SUCNR1	1163.63	4.80244	0.506104	9.48904	2.33183e-21	3.56296e-19	2.09988e-19	3.61747e-07
VPREB3	481.012	-4.39579	0.464528	-9.4629	2.99524e-21	4.5049e-19	2.65503e-19	3.61747e-07
ADAP2	293.008	1.93366	0.204342	9.46286	2.99624e-21	4.5049e-19	2.65503e-19	3.61747e-07
RIPK4	34.6608	-5.78232	0.611469	-9.45644	3.18602e-21	4.75223e-19	2.8008e-19	3.61747e-07
PRDM1	266.193	2.0927	0.221401	9.4521	3.32088e-21	4.91438e-19	2.89636e-19	3.61747e-07
GNA15	183.691	2.72878	0.289179	9.43628	3.86246e-21	5.67118e-19	3.34239e-19	3.61747e-07
SLC51A	1978.67	-4.06176	0.43063	-9.43213	4.01863e-21	5.85475e-19	3.45058e-19	3.61747e-07
MS4A4A	467.42	2.58659	0.274308	9.42951	4.11995e-21	5.95617e-19	3.51036e-19	3.61747e-07
TNFSF8	25.1889	2.63614	0.279712	9.42448	4.32252e-21	6.20134e-19	3.65485e-19	3.61747e-07
CSF1R	1788.35	2.56576	0.272391	9.4194	4.53676e-21	6.45939e-19	3.80694e-19	3.61747e-07
NLRP3	78.3835	2.80616	0.298032	9.41565	4.70163e-21	6.64379e-19	3.91562e-19	3.61747e-07
MPEG1	623.53	2.55265	0.271587	9.399	5.50841e-21	7.72575e-19	4.55329e-19	3.61747e-07
SLAMF1	16.4035	3.26892	0.348489	9.38025	6.58165e-21	9.16263e-19	5.40013e-19	3.61747e-07
INPP5D	506.085	1.82372	0.194724	9.36565	7.55815e-21	1.04205e-18	6.1415e-19	3.61747e-07
CD7	66.4553	2.8004	0.299024	9.36512	7.59611e-21	1.04205e-18	6.1415e-19	3.61747e-07
NCKAP1L	415.737	2.42722	0.259442	9.35556	8.31588e-21	1.13253e-18	6.67471e-19	3.61747e-07
LAIR1	526.866	2.47019	0.264266	9.34737	8.98574e-21	1.21495e-18	7.16049e-19	3.61747e-07
SNX20	65.7318	2.62581	0.281422	9.33051	1.05364e-20	1.41443e-18	8.33618e-19	3.61747e-07
CD200R1	33.3264	2.55087	0.273634	9.32221	1.13942e-20	1.51874e-18	8.9509e-19	3.61747e-07
PRSS8	677.473	5.95267	0.639306	9.31115	1.26461e-20	1.67373e-18	9.86439e-19	3.61747e-07
ISM1	1628.94	-4.87822	0.525014	-9.29159	1.51994e-20	1.99761e-18	1.17732e-18	3.61747e-07
MOB4	3643.34	-2.13734	0.230251	-9.28266	1.65293e-20	2.1573e-18	1.27144e-18	3.61747e-07
SIGLEC9	130.495	2.62913	0.28349	9.27414	1.79056e-20	2.30491e-18	1.35843e-18	3.61747e-07
IL2RA	85.791	4.06112	0.437884	9.27444	1.78562e-20	2.30491e-18	1.35843e-18	3.61747e-07
CD3D	49.5607	3.41784	0.369249	9.25617	2.11895e-20	2.70909e-18	1.59664e-18	3.61747e-07
C16orf54	25.1033	2.81345	0.305299	9.21541	3.10079e-20	3.93759e-18	2.32068e-18	3.61747e-07
MYOZ2	44.5732	4.26446	0.463817	9.19427	3.7754e-20	4.76207e-18	2.80659e-18	3.61747e-07
CYP3A7	241.787	3.99242	0.434708	9.18414	4.14837e-20	5.19763e-18	3.0633e-18	3.61747e-07
NFATC4	4944.69	-2.92445	0.31932	-9.15838	5.26826e-20	6.55706e-18	3.8645e-18	3.61747e-07
RGS18	40.1155	2.43658	0.266312	9.14934	5.72817e-20	7.08258e-18	4.17422e-18	3.61747e-07
COLEC12	376.347	3.45951	0.378471	9.14076	6.20166e-20	7.61791e-18	4.48973e-18	3.61747e-07
SLA	372.007	2.40434	0.26339	9.12843	6.94971e-20	8.48135e-18	4.99861e-18	3.61747e-07
PDCD1LG2	39.0184	2.56566	0.281114	9.12677	7.05752e-20	8.55736e-18	5.04341e-18	3.61747e-07
GRAP2	26.3102	3.33513	0.36574	9.11884	7.59293e-20	9.11409e-18	5.37152e-18	3.61747e-07
ARAP3	958.776	1.91802	0.210359	9.11786	7.66216e-20	9.11409e-18	5.37152e-18	3.61747e-07
ADH6	46.1702	5.18865	0.569056	9.11799	7.65272e-20	9.11409e-18	5.37152e-18	3.61747e-07
CNTFR	87.1692	-4.80866	0.527579	-9.11458	7.8979e-20	9.33542e-18	5.50197e-18	3.61747e-07
DACT2	392.751	-7.55609	0.829126	-9.11332	7.98988e-20	9.38512e-18	5.53126e-18	3.61747e-07
GPR132	48.505	2.4433	0.268227	9.10907	8.30914e-20	9.69951e-18	5.71655e-18	3.61747e-07
SEMA4G	548.943	-3.0165	0.331299	-9.10508	8.62038e-20	9.93935e-18	5.8579e-18	3.61747e-07
EBI3	163.227	2.28108	0.250512	9.10568	8.57313e-20	9.93935e-18	5.8579e-18	3.61747e-07
NKD1	888.378	-4.3445	0.477412	-9.10009	9.0254e-20	1.03429e-17	6.09574e-18	3.61747e-07
ADGRG6	107.011	2.95244	0.324722	9.09221	9.70423e-20	1.10534e-17	6.51449e-18	3.61747e-07
CTSA	60965.5	1.93448	0.212857	9.08816	1.0073e-19	1.14043e-17	6.7213e-18	3.61747e-07
EVI2A	146.866	2.22855	0.245355	9.08295	1.05667e-19	1.18917e-17	7.00854e-18	3.61747e-07
TRDN	239.839	5.39915	0.594952	9.07493	1.13751e-19	1.27253e-17	7.49983e-18	3.61747e-07
ASAH1	6661.76	1.42277	0.156825	9.07236	1.16461e-19	1.29513e-17	7.63306e-18	3.61747e-07
GPRC5A	1772.91	2.95053	0.32551	9.06431	1.25399e-19	1.37821e-17	8.12269e-18	3.61747e-07
ITGAM	294.545	2.36254	0.260636	9.06451	1.25166e-19	1.37821e-17	8.12269e-18	3.61747e-07
LCK	74.7355	2.40769	0.265947	9.0533	1.38714e-19	1.51569e-17	8.93293e-18	3.61747e-07
BUB3	6455.54	-1.2467	0.137826	-9.04547	1.49026e-19	1.61896e-17	9.54157e-18	3.61747e-07
LILRB1	148.178	2.14401	0.23762	9.02285	1.83263e-19	1.97945e-17	1.16662e-17	3.61747e-07
RASSF4	703.799	1.8775	0.208224	9.01672	1.93813e-19	2.08144e-17	1.22673e-17	3.61747e-07
CCR2	31.0746	3.34384	0.370971	9.01375	1.99122e-19	2.12631e-17	1.25317e-17	3.61747e-07
C8orf34	36.8395	5.20878	0.578791	8.99941	2.26937e-19	2.40963e-17	1.42015e-17	3.61747e-07
CD14	4284.36	2.75533	0.306315	8.99508	2.36071e-19	2.49254e-17	1.46901e-17	3.61747e-07
TPSAB1	237.448	5.54618	0.616917	8.99016	2.46882e-19	2.59212e-17	1.52771e-17	3.61747e-07
CD27	39.2247	2.73977	0.305264	8.97507	2.83169e-19	2.95659e-17	1.74251e-17	3.61747e-07
CD33	96.121	2.61388	0.291317	8.97263	2.89505e-19	3.00605e-17	1.77166e-17	3.61747e-07
CD48	121.168	2.71413	0.302581	8.96994	2.96688e-19	3.06371e-17	1.80564e-17	3.61747e-07
MINAR1	195.626	-3.63107	0.405359	-8.95765	3.31685e-19	3.40639e-17	2.0076e-17	3.61747e-07
CYTIP	85.7987	2.23364	0.249562	8.95024	3.54703e-19	3.62298e-17	2.13526e-17	3.61747e-07
SASH3	214.152	2.26604	0.253248	8.94788	3.62363e-19	3.66142e-17	2.15791e-17	3.61747e-07
SLC44A4	707.182	-2.74357	0.306599	-8.94839	3.60716e-19	3.66142e-17	2.15791e-17	3.61747e-07
SERPINA1	599.34	3.47009	0.388006	8.94339	3.77403e-19	3.793e-17	2.23546e-17	3.61747e-07
TFEC	71.0126	2.24289	0.251342	8.92366	4.51111e-19	4.50967e-17	2.65784e-17	3.61747e-07
THEMIS	11.0927	3.36542	0.377171	8.92279	4.54697e-19	4.52147e-17	2.6648e-17	3.61747e-07
CMKLR1	306.146	2.61772	0.293403	8.92194	4.58203e-19	4.53235e-17	2.67121e-17	3.61747e-07
GPR34	231.527	2.26303	0.254583	8.88917	6.15686e-19	6.05822e-17	3.5705e-17	3.61747e-07
RRAD	888.267	3.74771	0.421673	8.88773	6.23715e-19	6.10526e-17	3.59823e-17	3.61747e-07
CD244	12.7027	2.6727	0.30152	8.86407	7.71436e-19	7.51211e-17	4.42737e-17	3.61747e-07
BTK	122.845	2.2704	0.256318	8.85776	8.16403e-19	7.90901e-17	4.6613e-17	3.61747e-07
VNN1	45.0102	3.49917	0.395355	8.85068	8.69838e-19	8.38345e-17	4.94091e-17	3.61747e-07
CCDC73	86.9649	-3.2079	0.362552	-8.8481	8.90199e-19	8.53592e-17	5.03077e-17	3.61747e-07
GPSM3	347.016	1.89111	0.213864	8.84258	9.35356e-19	8.92339e-17	5.25913e-17	3.61747e-07
GPR171	13.594	3.07081	0.348117	8.8212	1.13236e-18	1.07483e-16	6.33466e-17	3.61747e-07
LAPTM5	4145.17	2.19663	0.249172	8.8157	1.18941e-18	1.1233e-16	6.62036e-17	3.61747e-07
CCL8	36.134	2.98309	0.338849	8.80361	1.32483e-18	1.24494e-16	7.33727e-17	3.61747e-07
GZMH	52.0776	2.87124	0.326211	8.80181	1.34632e-18	1.25884e-16	7.41919e-17	3.61747e-07
GIMAP6	425.2	1.49797	0.170244	8.79899	1.38056e-18	1.28447e-16	7.57019e-17	3.61747e-07
FGL2	614.955	2.11576	0.240572	8.79468	1.43452e-18	1.3281e-16	7.82736e-17	3.61747e-07
VAMP8	743.415	2.43285	0.276669	8.79336	1.45152e-18	1.33724e-16	7.88125e-17	3.61747e-07
CCR5	74.9073	2.9216	0.332382	8.7899	1.49696e-18	1.37239e-16	8.08837e-17	3.61747e-07
ZFPM2	275.477	2.61473	0.297852	8.77862	1.65488e-18	1.50979e-16	8.8982e-17	3.61747e-07
ITGAL	259.547	2.04704	0.233436	8.76919	1.79954e-18	1.63384e-16	9.62929e-17	3.61747e-07
DMKN	683.505	-3.65362	0.417016	-8.76134	1.92951e-18	1.74342e-16	1.02751e-16	3.61747e-07
PDE9A	828.439	-1.84301	0.210644	-8.7494	2.14497e-18	1.92883e-16	1.13679e-16	3.61747e-07
PTPRO	51.569	2.7245	0.311571	8.7444	2.242e-18	2.00649e-16	1.18255e-16	3.61747e-07
EVI2B	202.971	2.033	0.23274	8.73509	2.4347e-18	2.16862e-16	1.27811e-16	3.61747e-07
NR4A3	1159.19	-2.91413	0.333718	-8.73231	2.49513e-18	2.21196e-16	1.30365e-16	3.61747e-07
SIM2	172.045	-2.95027	0.337885	-8.73157	2.51157e-18	2.21608e-16	1.30608e-16	3.61747e-07
COL2A1	294.986	-5.13149	0.587814	-8.72978	2.55174e-18	2.23058e-16	1.31462e-16	3.61747e-07
GBP2	3472.88	2.44849	0.280472	8.72989	2.54923e-18	2.23058e-16	1.31462e-16	3.61747e-07
CFB	185.727	3.54664	0.406808	8.71822	2.82614e-18	2.45901e-16	1.44925e-16	3.61747e-07
ZNF114	97.9935	-2.81522	0.323158	-8.7116	2.99607e-18	2.59485e-16	1.52931e-16	3.61747e-07
PIK3CD	231.724	1.91039	0.219455	8.70516	3.17129e-18	2.734e-16	1.61133e-16	3.61747e-07
PTPN22	35.0676	2.4035	0.276196	8.70218	3.25556e-18	2.79384e-16	1.64659e-16	3.61747e-07
MFAP4	6290.63	5.29922	0.610285	8.68319	3.84811e-18	3.28734e-16	1.93744e-16	3.61747e-07
ICAM5	318.282	-4.22635	0.487411	-8.67102	4.28284e-18	3.60949e-16	2.12731e-16	3.61747e-07
ATP6V1B2	4884.35	1.11547	0.128641	8.67116	4.27736e-18	3.60949e-16	2.12731e-16	3.61747e-07
RHEX	16.2052	5.8287	0.672163	8.67155	4.26261e-18	3.60949e-16	2.12731e-16	3.61747e-07
LYZ	470.45	2.59801	0.299882	8.66344	4.57748e-18	3.84058e-16	2.26351e-16	3.61747e-07
CAMK2A	42.6999	4.44827	0.514157	8.65159	5.07877e-18	4.24224e-16	2.50023e-16	3.61747e-07
LRRC38	417.746	-5.87503	0.679561	-8.64533	5.36482e-18	4.46135e-16	2.62936e-16	3.61747e-07
TBX5	39.1788	-6.66449	0.771495	-8.63842	5.69978e-18	4.71343e-16	2.77793e-16	3.61747e-07
SAMSN1	137.979	2.36264	0.273516	8.63805	5.71811e-18	4.71343e-16	2.77793e-16	3.61747e-07
BMP7	253.157	-5.81463	0.674837	-8.61635	6.91248e-18	5.67307e-16	3.34351e-16	3.61747e-07
NRROS	146.51	1.77554	0.206195	8.61098	7.24414e-18	5.91941e-16	3.48869e-16	3.61747e-07
SIGLEC1	525.549	2.69793	0.313397	8.60865	7.39235e-18	6.01437e-16	3.54466e-16	3.61747e-07
MUCL1	470.381	-7.64274	0.887962	-8.60706	7.49612e-18	6.07251e-16	3.57892e-16	3.61747e-07
KBTBD8	157.777	2.61084	0.303485	8.60285	7.77598e-18	6.27218e-16	3.6966e-16	3.61747e-07
CD53	588.456	2.17163	0.252491	8.60081	7.91552e-18	6.35745e-16	3.74686e-16	3.61747e-07
GZMK	56.9593	3.58727	0.41771	8.58793	8.85525e-18	7.08194e-16	4.17385e-16	3.61747e-07
PRSS1	47.1018	7.20994	0.83972	8.58612	8.99564e-18	7.16373e-16	4.22205e-16	3.61747e-07
HMX1	39.2478	-6.52659	0.760858	-8.57794	9.65911e-18	7.65963e-16	4.51432e-16	3.61747e-07
LTF	82.7365	3.65679	0.426787	8.56818	1.05131e-17	8.30184e-16	4.89282e-16	3.61747e-07
ARHGAP9	156.685	2.09829	0.245071	8.56195	1.10975e-17	8.72662e-16	5.14316e-16	3.61747e-07
FCGR2A	686.112	2.17084	0.253623	8.55935	1.1351e-17	8.88882e-16	5.23876e-16	3.61747e-07
CXCL10	157.301	3.29018	0.384466	8.5578	1.15039e-17	8.97113e-16	5.28727e-16	3.61747e-07
EPO	22.9691	-3.55143	0.415215	-8.55322	1.19704e-17	9.29635e-16	5.47895e-16	3.61747e-07
ZNF831	10.7083	3.32419	0.389107	8.54311	1.30652e-17	1.01048e-15	5.95542e-16	3.61747e-07
B3GALT2	89.999	4.10248	0.480336	8.54085	1.33237e-17	1.02625e-15	6.04837e-16	3.61747e-07
GIMAP1	247.535	1.59826	0.187158	8.53963	1.34655e-17	1.03294e-15	6.0878e-16	3.61747e-07
STING1	580.484	1.67664	0.19664	8.52646	1.50896e-17	1.15282e-15	6.79432e-16	3.61747e-07
LPAR6	661.601	1.65235	0.193918	8.52086	1.58372e-17	1.20504e-15	7.10209e-16	3.61747e-07
PSD3	3337.34	-1.74983	0.205493	-8.51527	1.66205e-17	1.25954e-15	7.42327e-16	3.61747e-07
MRC1	678.968	2.54407	0.298987	8.50898	1.75468e-17	1.3244e-15	7.80553e-16	3.61747e-07
HLA-DRB5	2930.31	2.83701	0.333451	8.50803	1.76918e-17	1.33e-15	7.83853e-16	3.61747e-07
IGF1	54.0328	2.96129	0.348294	8.50228	1.859e-17	1.39196e-15	8.20371e-16	3.61747e-07
AOAH	145.588	2.40205	0.28256	8.50101	1.87952e-17	1.40173e-15	8.26133e-16	3.61747e-07
RHOH	34.3308	2.59621	0.305617	8.49501	1.97924e-17	1.47027e-15	8.66524e-16	3.61747e-07
LY9	21.8468	3.0333	0.357204	8.49178	2.03502e-17	1.50575e-15	8.87437e-16	3.61747e-07
ADAM28	117.9	2.30921	0.271955	8.49114	2.04627e-17	1.50814e-15	8.88845e-16	3.61747e-07
SH3BP2	1337.75	1.9739	0.232838	8.47757	2.29945e-17	1.68812e-15	9.94917e-16	3.61747e-07
ADH4	89.0477	6.43346	0.759091	8.47522	2.34641e-17	1.71589e-15	1.01129e-15	3.61747e-07
CXCL12	950.038	2.94644	0.347876	8.46978	2.45864e-17	1.79099e-15	1.05555e-15	3.61747e-07
STAT4	40.082	2.0942	0.247625	8.45713	2.74039e-17	1.98618e-15	1.17059e-15	3.61747e-07
RGS9BP	24.0487	-2.34588	0.277395	-8.45682	2.74773e-17	1.98618e-15	1.17059e-15	3.61747e-07
DLX4	49.9099	-4.20345	0.497356	-8.45159	2.87354e-17	2.06917e-15	1.2195e-15	3.61747e-07
CD8B	31.6344	3.5379	0.418908	8.44554	3.02631e-17	2.17086e-15	1.27943e-15	3.61747e-07
ASB4	5320.68	-3.68657	0.436817	-8.43961	3.18391e-17	2.27523e-15	1.34094e-15	3.61747e-07
LILRB4	241.118	2.34809	0.27826	8.43846	3.21542e-17	2.28904e-15	1.34908e-15	3.61747e-07
TSPAN32	20.509	2.33502	0.276988	8.43003	3.45569e-17	2.44159e-15	1.43899e-15	3.61747e-07
SP140	50.606	2.49502	0.295963	8.43019	3.45104e-17	2.44159e-15	1.43899e-15	3.61747e-07
ARHGAP24	730.174	2.04908	0.243246	8.42392	3.64082e-17	2.56276e-15	1.5104e-15	3.61747e-07
BIN2	138.013	2.04078	0.242338	8.42122	3.7258e-17	2.60307e-15	1.53416e-15	3.61747e-07
CR1	33.7699	4.53865	0.538947	8.42134	3.72207e-17	2.60307e-15	1.53416e-15	3.61747e-07
SYNPO2L	22.4587	3.47528	0.414063	8.39312	4.73405e-17	3.29525e-15	1.94211e-15	3.61747e-07
STAB1	3763.64	2.04008	0.243114	8.39147	4.80116e-17	3.31739e-15	1.95515e-15	3.61747e-07
P2RY13	98.016	2.84302	0.338788	8.39175	4.78965e-17	3.31739e-15	1.95515e-15	3.61747e-07
TTC25	87.5332	1.68294	0.200842	8.37943	5.31858e-17	3.66145e-15	2.15793e-15	3.61747e-07
SYNPO2	658.934	2.22726	0.265898	8.37638	5.45823e-17	3.74387e-15	2.2065e-15	3.61747e-07
PHKG1	259.117	2.39546	0.286155	8.37121	5.70275e-17	3.89736e-15	2.29697e-15	3.61747e-07
SLPI	7142.4	5.39968	0.645568	8.36422	6.05132e-17	4.1206e-15	2.42854e-15	3.61747e-07
RPP40	653.403	-1.42549	0.170447	-8.36325	6.10152e-17	4.13978e-15	2.43984e-15	3.61747e-07
SDK2	232.957	-3.46739	0.415137	-8.35239	6.68939e-17	4.50611e-15	2.65574e-15	3.61747e-07
ATP4A	1485.61	-3.77854	0.452383	-8.35252	6.68201e-17	4.50611e-15	2.65574e-15	3.61747e-07
LARGE2	390.621	-4.45658	0.533641	-8.35127	6.75311e-17	4.53278e-15	2.67146e-15	3.61747e-07
TLR8	29.0363	2.9906	0.358566	8.34045	7.4009e-17	4.94991e-15	2.9173e-15	3.61747e-07
PRKD3	3126.69	-1.93659	0.232209	-8.33984	7.4394e-17	4.95802e-15	2.92208e-15	3.61747e-07
TLE1	3588.99	-1.41903	0.170386	-8.3283	8.20138e-17	5.44653e-15	3.20999e-15	3.61747e-07
TFEB	704.981	1.97037	0.236837	8.31953	8.83164e-17	5.84443e-15	3.4445e-15	3.61747e-07
CSGALNACT1	1674.68	2.36884	0.285165	8.30692	9.82175e-17	6.47684e-15	3.81722e-15	3.61747e-07
LHX5	24.109	-5.40885	0.651684	-8.29981	1.0428e-16	6.85256e-15	4.03866e-15	3.61747e-07
GPR141	6.98248	3.60153	0.434127	8.29602	1.07654e-16	7.04965e-15	4.15481e-15	3.61747e-07
TPSD1	46.212	5.87007	0.707632	8.29537	1.08249e-16	7.06401e-15	4.16328e-15	3.61747e-07
AIF1	624.636	2.30286	0.277683	8.29312	1.10314e-16	7.17349e-15	4.2278e-15	3.61747e-07
RASL10B	256.083	-3.24217	0.390966	-8.29272	1.1069e-16	7.17349e-15	4.2278e-15	3.61747e-07
PLCL1	543.125	2.8763	0.346953	8.29017	1.13089e-16	7.30377e-15	4.30459e-15	3.61747e-07
MYH4	95.9814	-8.55086	1.0318	-8.2873	1.15845e-16	7.45611e-15	4.39437e-15	3.61747e-07
C6orf223	499.229	-7.37082	0.889642	-8.28515	1.17961e-16	7.56642e-15	4.45938e-15	3.61747e-07
CD3G	19.6647	3.046	0.367789	8.28192	1.21209e-16	7.7483e-15	4.56657e-15	3.61747e-07
WAS	242.042	1.9844	0.239644	8.28062	1.22532e-16	7.80635e-15	4.60079e-15	3.61747e-07
ADGRD1	239.249	-3.81637	0.46216	-8.25768	1.48534e-16	9.39917e-15	5.53954e-15	3.61747e-07
MYLK3	210.626	3.73583	0.452393	8.25793	1.48214e-16	9.39917e-15	5.53954e-15	3.61747e-07
QSOX2	1711.54	-1.42481	0.172618	-8.25407	1.53084e-16	9.65459e-15	5.69007e-15	3.61747e-07
TCN1	80.1547	5.24096	0.63507	8.25258	1.55013e-16	9.74353e-15	5.74249e-15	3.61747e-07
ATL2	2665.13	-1.00543	0.121903	-8.2478	1.61339e-16	1.01073e-14	5.95691e-15	3.61747e-07
CATSPER1	50.1972	3.2415	0.393102	8.24594	1.63862e-16	1.02313e-14	6.02996e-15	3.61747e-07
ITGB2	1412.88	2.15669	0.261599	8.24426	1.66187e-16	1.03421e-14	6.09527e-15	3.61747e-07
ABCA6	180.087	3.19399	0.387498	8.2426	1.68506e-16	1.04174e-14	6.13966e-15	3.61747e-07
FAM178B	48.7065	4.50158	0.546116	8.24291	1.68077e-16	1.04174e-14	6.13966e-15	3.61747e-07
TRIM22	733.68	2.03627	0.247149	8.23902	1.73628e-16	1.06989e-14	6.30557e-15	3.61747e-07
BRSK1	656.026	-1.71515	0.208195	-8.23822	1.74788e-16	1.07352e-14	6.32695e-15	3.61747e-07
ITIH3	244.131	-3.68009	0.446857	-8.2355	1.78811e-16	1.09465e-14	6.45147e-15	3.61747e-07
AFF3	777.597	-3.29245	0.400514	-8.22057	2.02541e-16	1.23589e-14	7.28392e-15	3.61747e-07
FPR1	138.168	3.09026	0.376079	8.21706	2.08557e-16	1.26848e-14	7.476e-15	3.61747e-07
HS3ST4	184.403	5.51511	0.671229	8.21643	2.09644e-16	1.27098e-14	7.49073e-15	3.61747e-07
NAT8L	353.177	-3.75409	0.457055	-8.21365	2.14568e-16	1.29665e-14	7.64202e-15	3.61747e-07
RNASE6	303.436	2.16383	0.263841	8.20124	2.37914e-16	1.43312e-14	8.44633e-15	3.61747e-07
SLAMF7	79.2323	2.74494	0.33479	8.199	2.42403e-16	1.45123e-14	8.55301e-15	3.61747e-07
MYO1F	455.464	1.73243	0.211298	8.19897	2.42463e-16	1.45123e-14	8.55301e-15	3.61747e-07
GOLGA6L2	20.3477	-6.05687	0.741055	-8.17331	3.00047e-16	1.79018e-14	1.05507e-14	3.61747e-07
PHLDB2	767.936	2.0696	0.253406	8.16712	3.15829e-16	1.87838e-14	1.10705e-14	3.61747e-07
VNN2	114.118	3.23509	0.396181	8.16569	3.19603e-16	1.89483e-14	1.11675e-14	3.61747e-07
ERN1	3589.98	-1.69494	0.207728	-8.15943	3.36598e-16	1.98932e-14	1.17243e-14	3.61747e-07
CCL22	394.592	-4.5143	0.553323	-8.15853	3.39123e-16	1.99795e-14	1.17752e-14	3.61747e-07
KYNU	129.134	3.02481	0.371185	8.14906	3.66751e-16	2.15398e-14	1.26948e-14	3.61747e-07
CHST6	1386.79	3.84863	0.472369	8.1475	3.71516e-16	2.17516e-14	1.28196e-14	3.61747e-07
FOXK1	3151.62	-1.08766	0.133622	-8.13984	3.9579e-16	2.31009e-14	1.36148e-14	3.61747e-07
GNLY	110.068	2.71588	0.3337	8.13869	3.99587e-16	2.31785e-14	1.36606e-14	3.61747e-07
IRF1	1003.08	1.63292	0.200632	8.13891	3.98856e-16	2.31785e-14	1.36606e-14	3.61747e-07
TMEM154	26.9925	2.04247	0.250979	8.13802	4.01799e-16	2.32351e-14	1.36939e-14	3.61747e-07
SLC22A11	86.4617	-5.54823	0.682073	-8.13435	4.1414e-16	2.38753e-14	1.40713e-14	3.61747e-07
REG3G	387.012	6.30763	0.77553	8.13331	4.17714e-16	2.40077e-14	1.41493e-14	3.61747e-07
IRF8	156.574	2.12382	0.261183	8.13155	4.23846e-16	2.42859e-14	1.43132e-14	3.61747e-07
TBXAS1	378.327	2.03554	0.250437	8.12794	4.36659e-16	2.4944e-14	1.47011e-14	3.61747e-07
CD209	260.458	3.33692	0.410595	8.12704	4.39892e-16	2.50118e-14	1.47411e-14	3.61747e-07
TM4SF1	2003.41	2.08318	0.256332	8.12687	4.40507e-16	2.50118e-14	1.47411e-14	3.61747e-07
BARX1	26.0433	-4.91609	0.604995	-8.12583	4.443e-16	2.51412e-14	1.48173e-14	3.61747e-07
AXDND1	55.1815	-2.72926	0.335888	-8.12552	4.45462e-16	2.51412e-14	1.48173e-14	3.61747e-07
GNA14	76.5555	2.31464	0.284894	8.12456	4.48989e-16	2.52644e-14	1.48899e-14	3.61747e-07
PDE8A	1901.33	-1.13863	0.140197	-8.12166	4.59856e-16	2.57986e-14	1.52048e-14	3.61747e-07
TDRD12	401.652	-4.06874	0.501283	-8.11666	4.79191e-16	2.68033e-14	1.57969e-14	3.61747e-07
SPNS3	203.625	3.35886	0.414187	8.10954	5.08108e-16	2.83364e-14	1.67005e-14	3.61747e-07
ADGRG5	24.1749	2.86883	0.353801	8.10861	5.12001e-16	2.84691e-14	1.67787e-14	3.61747e-07
ACAN	822.835	-3.9404	0.4863	-8.10282	5.37018e-16	2.9772e-14	1.75466e-14	3.61747e-07
SLAMF8	195.405	2.32039	0.286682	8.09395	5.77626e-16	3.19291e-14	1.88179e-14	3.61747e-07
PI3	64.5529	4.45965	0.551028	8.09332	5.80582e-16	3.19984e-14	1.88587e-14	3.61747e-07
AKR1D1	79.5524	4.06948	0.503163	8.0878	6.0753e-16	3.33492e-14	1.96549e-14	3.61747e-07
KLHL6	87.2751	2.0389	0.252103	8.08758	6.08641e-16	3.33492e-14	1.96549e-14	3.61747e-07
VSTM4	4709.17	-2.15662	0.267042	-8.07595	6.69553e-16	3.65802e-14	2.15591e-14	3.61747e-07
MYH7B	732.075	-3.60774	0.447448	-8.06293	7.44849e-16	4.05759e-14	2.3914e-14	3.61747e-07
VAX1	20.9696	-6.26576	0.777454	-8.05934	7.6707e-16	4.16657e-14	2.45563e-14	3.61747e-07
KIF26A	778.234	-2.95027	0.366236	-8.05565	7.90544e-16	4.28169e-14	2.52348e-14	3.61747e-07
CRYBB1	21.9091	2.16033	0.268663	8.04106	8.90627e-16	4.8099e-14	2.83478e-14	3.61747e-07
HEBP1	5857.64	1.15616	0.143881	8.03552	9.3185e-16	5.01811e-14	2.9575e-14	3.61747e-07
COL26A1	506.986	-3.75046	0.466769	-8.03495	9.36204e-16	5.02715e-14	2.96282e-14	3.61747e-07
ISL1	202.062	-6.94173	0.864181	-8.03273	9.53252e-16	5.10411e-14	3.00818e-14	3.61747e-07
NEURL2	70.7967	1.60463	0.199808	8.03088	9.67797e-16	5.16727e-14	3.04541e-14	3.61747e-07
PLEKHG6	65.1588	3.89146	0.484973	8.02408	1.02292e-15	5.4307e-14	3.20066e-14	3.61747e-07
LOXL1	261.815	2.22923	0.277816	8.02411	1.02262e-15	5.4307e-14	3.20066e-14	3.61747e-07
CCR1	150.556	2.29872	0.286544	8.02224	1.03837e-15	5.49721e-14	3.23986e-14	3.61747e-07
PTX4	27.5811	-3.02056	0.376762	-8.01715	1.08225e-15	5.71344e-14	3.3673e-14	3.61747e-07
RHOD	73.2204	3.46177	0.43216	8.0104	1.14334e-15	6.01901e-14	3.54739e-14	3.61747e-07
RHBG	371.051	-3.84949	0.480759	-8.00712	1.17426e-15	6.16453e-14	3.63316e-14	3.61747e-07
MAPKAPK3	3640.34	1.34512	0.168027	8.00539	1.19087e-15	6.21701e-14	3.66409e-14	3.61747e-07
HOXD13	35.7525	-5.144	0.64256	-8.00547	1.19007e-15	6.21701e-14	3.66409e-14	3.61747e-07
CAMKK1	1163.07	1.85148	0.231303	8.00454	1.19909e-15	6.24259e-14	3.67916e-14	3.61747e-07
ARHGDIB	2564.73	1.48263	0.185362	7.99854	1.25899e-15	6.53634e-14	3.85229e-14	3.61747e-07
SCG2	3628.36	4.49772	0.56292	7.98997	1.34973e-15	6.98809e-14	4.11854e-14	3.61747e-07
PPL	1831.28	2.80875	0.351713	7.98591	1.39488e-15	7.20203e-14	4.24462e-14	3.61747e-07
POF1B	41.7983	4.11576	0.515801	7.97935	1.47107e-15	7.57462e-14	4.46421e-14	3.61747e-07
LTB4R	660.608	-1.82713	0.22907	-7.97628	1.50811e-15	7.74408e-14	4.56409e-14	3.61747e-07
NTNG2	304.884	-2.75594	0.34577	-7.97046	1.5809e-15	8.09577e-14	4.77136e-14	3.61747e-07
RASGRP4	60.8777	2.02893	0.254594	7.96928	1.59604e-15	8.15108e-14	4.80396e-14	3.61747e-07
HHATL	325.648	5.07849	0.637291	7.96887	1.60134e-15	8.15601e-14	4.80687e-14	3.61747e-07
ADGRE3	11.1729	5.10796	0.641081	7.96773	1.6161e-15	8.20892e-14	4.83805e-14	3.61747e-07
FATE1	6159.65	-4.8811	0.613795	-7.95233	1.83031e-15	9.27194e-14	5.46455e-14	3.61747e-07
LY96	730.3	2.85278	0.359069	7.94495	1.94276e-15	9.81512e-14	5.78469e-14	3.61747e-07
NCF4	248.896	2.21134	0.278788	7.93196	2.15716e-15	1.08691e-13	6.40585e-14	3.61747e-07
DNAI1	19.5207	3.2207	0.406431	7.92435	2.29341e-15	1.15247e-13	6.79224e-14	3.61747e-07
CD38	74.7953	2.49925	0.315462	7.92253	2.32731e-15	1.1652e-13	6.8673e-14	3.61747e-07
NFAM1	175.442	2.12976	0.268831	7.92232	2.33115e-15	1.1652e-13	6.8673e-14	3.61747e-07
SOD2	15442.2	1.38128	0.17436	7.92197	2.33768e-15	1.16537e-13	6.86826e-14	3.61747e-07
TRANK1	695.995	1.33825	0.168952	7.92087	2.35858e-15	1.17268e-13	6.91134e-14	3.61747e-07
C1QA	5610.74	2.3726	0.299632	7.9184	2.4058e-15	1.193e-13	7.0311e-14	3.61747e-07
HCK	311.791	2.06742	0.261181	7.91568	2.459e-15	1.21331e-13	7.15082e-14	3.61747e-07
TMEM273	143.903	1.92259	0.242885	7.91565	2.45967e-15	1.21331e-13	7.15082e-14	3.61747e-07
DSC2	96.0562	2.50378	0.316511	7.91054	2.56271e-15	1.26083e-13	7.43086e-14	3.61747e-07
SMYD2	1612.15	-1.49267	0.188786	-7.90669	2.64316e-15	1.29701e-13	7.64413e-14	3.61747e-07
CERKL	113.585	1.86838	0.236343	7.90535	2.67183e-15	1.30767e-13	7.70692e-14	3.61747e-07
POU4F1	42.0944	-5.90296	0.746914	-7.90314	2.71964e-15	1.32761e-13	7.82446e-14	3.61747e-07
PDZK1	53.8341	-2.19364	0.277578	-7.9028	2.72709e-15	1.3278e-13	7.82557e-14	3.61747e-07
ITGA9	2990.43	-1.41553	0.179216	-7.89842	2.82456e-15	1.3717e-13	8.08432e-14	3.61747e-07
DPP10	819.914	-3.50927	0.444322	-7.89805	2.83308e-15	1.37229e-13	8.08779e-14	3.61747e-07
SIRPG	21.2516	3.49563	0.443541	7.8812	3.24256e-15	1.5666e-13	9.23299e-14	3.61747e-07
HAUS8	407.601	-1.45101	0.184164	-7.87891	3.30259e-15	1.5864e-13	9.34967e-14	3.61747e-07
GPR65	71.2975	2.4128	0.306257	7.87835	3.31731e-15	1.5864e-13	9.34967e-14	3.61747e-07
FAM171A1	2655.96	-1.94737	0.247155	-7.87916	3.29587e-15	1.5864e-13	9.34967e-14	3.61747e-07
PMEL	77.5338	1.94407	0.246755	7.87854	3.31221e-15	1.5864e-13	9.34967e-14	3.61747e-07
DPYD	782.72	1.89239	0.240249	7.87678	3.3592e-15	1.60235e-13	9.44371e-14	3.61747e-07
WDFY4	120.272	1.95859	0.248923	7.86824	3.59671e-15	1.71131e-13	1.00858e-13	3.61747e-07
TBX21	17.336	2.41595	0.307296	7.86195	3.78187e-15	1.79486e-13	1.05783e-13	3.61747e-07
TMEM106A	138.866	2.12012	0.270207	7.84628	4.28547e-15	2.02874e-13	1.19567e-13	3.61747e-07
RASGEF1B	180.881	1.8911	0.241242	7.83901	4.54127e-15	2.13906e-13	1.26069e-13	3.61747e-07
LGI2	68.1985	2.30712	0.294309	7.83912	4.53698e-15	2.13906e-13	1.26069e-13	3.61747e-07
ADAMTS16	23.2738	3.35332	0.427971	7.83537	4.67453e-15	2.19633e-13	1.29444e-13	3.61747e-07
SCT	75.4373	-5.61246	0.716586	-7.83223	4.79305e-15	2.2464e-13	1.32395e-13	3.61747e-07
IGDCC3	22.143	-3.59633	0.459404	-7.82825	4.94701e-15	2.31279e-13	1.36308e-13	3.61747e-07
TASL	25.8981	2.36128	0.301877	7.82198	5.19975e-15	2.41956e-13	1.426e-13	3.61747e-07
FCER1G	830.878	2.14833	0.274654	7.82195	5.20113e-15	2.41956e-13	1.426e-13	3.61747e-07
ASGR2	10.4606	2.3123	0.29565	7.82106	5.23802e-15	2.4307e-13	1.43257e-13	3.61747e-07
GDF10	99.3083	-4.19127	0.536344	-7.81451	5.51755e-15	2.55411e-13	1.5053e-13	3.61747e-07
CNOT3	2166.88	-0.64003	0.0819066	-7.81415	5.53357e-15	2.55523e-13	1.50596e-13	3.61747e-07
PIGH	1293.58	-1.01839	0.13047	-7.80557	5.92336e-15	2.72852e-13	1.6081e-13	3.61747e-07
SBSPON	342.056	-2.87771	0.368832	-7.80223	6.08205e-15	2.79477e-13	1.64714e-13	3.61747e-07
IL24	17.5796	3.09815	0.397128	7.80139	6.12307e-15	2.80675e-13	1.6542e-13	3.61747e-07
QPCT	21093.5	-2.93799	0.376774	-7.79776	6.30171e-15	2.88161e-13	1.69832e-13	3.61747e-07
EMC9	1281.74	-1.07665	0.138096	-7.79637	6.37118e-15	2.90631e-13	1.71288e-13	3.61747e-07
CD1E	11.5374	4.48572	0.575754	7.79105	6.64554e-15	3.02412e-13	1.78231e-13	3.61747e-07
LPAR5	127.795	2.39034	0.306821	7.79067	6.6655e-15	3.02588e-13	1.78335e-13	3.61747e-07
RNF125	124.337	1.35989	0.174731	7.78278	7.09481e-15	3.20529e-13	1.88908e-13	3.61747e-07
COX20	442.832	-1.43613	0.184524	-7.78289	7.08847e-15	3.20529e-13	1.88908e-13	3.61747e-07
PDHA1	4227.32	0.975012	0.125316	7.78045	7.22683e-15	3.2571e-13	1.91962e-13	3.61747e-07
CDK6	2660.57	-1.7131	0.220231	-7.77865	7.33038e-15	3.29586e-13	1.94247e-13	3.61747e-07
BMF	350.052	1.99558	0.256674	7.77477	7.5582e-15	3.39019e-13	1.99806e-13	3.61747e-07
CYTH4	415.342	1.74906	0.225056	7.77165	7.74687e-15	3.46654e-13	2.04306e-13	3.61747e-07
CYBA	1193.23	1.966	0.253049	7.76923	7.89663e-15	3.52516e-13	2.07761e-13	3.61747e-07
SLC6A9	2065.3	-2.25806	0.291055	-7.75817	8.61623e-15	3.83728e-13	2.26156e-13	3.61747e-07
NCF2	180.732	1.90996	0.246289	7.75496	8.83699e-15	3.9263e-13	2.31402e-13	3.61747e-07
S1PR4	41.4583	1.92934	0.248866	7.75251	9.00911e-15	3.99333e-13	2.35353e-13	3.61747e-07
OTUD3	622.412	-1.25167	0.16159	-7.74597	9.48542e-15	4.19456e-13	2.47213e-13	3.61747e-07
SLC31A1	2506.65	-1.30249	0.16816	-7.74556	9.51578e-15	4.19811e-13	2.47422e-13	3.61747e-07
EHMT1	3087.62	-0.874806	0.11303	-7.73962	9.97115e-15	4.38871e-13	2.58655e-13	3.61747e-07
IQUB	70.685	2.32912	0.30095	7.73921	1.00038e-14	4.39281e-13	2.58897e-13	3.61747e-07
SPRR1A	2223.45	-5.55256	0.717951	-7.7339	1.04298e-14	4.56919e-13	2.69292e-13	3.61747e-07
ZBP1	15.4965	2.5265	0.326811	7.73077	1.06899e-14	4.67225e-13	2.75366e-13	3.61747e-07
ASB6	1931.09	-0.953802	0.123503	-7.72288	1.13731e-14	4.9593e-13	2.92284e-13	3.61747e-07
IRX2	102.332	-5.15617	0.668067	-7.71803	1.18141e-14	5.13966e-13	3.02914e-13	3.61747e-07
XCR1	6.93487	3.52167	0.456327	7.71741	1.18714e-14	5.1527e-13	3.03682e-13	3.61747e-07
HOXA11	308.079	-2.9516	0.382781	-7.71094	1.24893e-14	5.40837e-13	3.1875e-13	3.61747e-07
CD163	1606.39	2.4032	0.311846	7.70638	1.29441e-14	5.59244e-13	3.29599e-13	3.61747e-07
TMEM150B	30.6751	2.26759	0.294331	7.70419	1.31671e-14	5.67574e-13	3.34508e-13	3.61747e-07
CLEC7A	97.6036	2.09221	0.271584	7.70374	1.3214e-14	5.68291e-13	3.34931e-13	3.61747e-07
CTSG	8.54427	5.16485	0.672013	7.68565	1.52226e-14	6.52413e-13	3.84509e-13	3.61747e-07
CORO1A	833.506	2.09201	0.272201	7.68551	1.52394e-14	6.52413e-13	3.84509e-13	3.61747e-07
CXCR3	27.5361	2.85078	0.370947	7.68513	1.52837e-14	6.52824e-13	3.84751e-13	3.61747e-07
FCMR	50.353	2.19758	0.286088	7.68151	1.57228e-14	6.69521e-13	3.94592e-13	3.61747e-07
AL691442.1	15.9522	-3.27333	0.426142	-7.68132	1.57459e-14	6.69521e-13	3.94592e-13	3.61747e-07
LRRC9	70.2625	-3.21123	0.41808	-7.68088	1.57997e-14	6.70292e-13	3.95047e-13	3.61747e-07
APOL4	68.8043	2.51556	0.327768	7.67484	1.6563e-14	7.01094e-13	4.132e-13	3.61747e-07
FGD2	180.752	1.97199	0.256978	7.67376	1.6703e-14	7.05429e-13	4.15755e-13	3.61747e-07
TRAPPC6B	1537.43	-0.797311	0.103932	-7.67146	1.70051e-14	7.16578e-13	4.22326e-13	3.61747e-07
JAML	142.137	2.3923	0.3121	7.66518	1.7858e-14	7.50836e-13	4.42516e-13	3.61747e-07
GIMAP7	343.487	1.63855	0.213784	7.6645	1.79526e-14	7.5313e-13	4.43868e-13	3.61747e-07
MITF	318.043	1.82273	0.237944	7.66032	1.85468e-14	7.76324e-13	4.57538e-13	3.61747e-07
CCDC152	131.179	1.89486	0.247371	7.65999	1.85941e-14	7.76572e-13	4.57685e-13	3.61747e-07
SELPLG	480.413	2.11394	0.276132	7.65555	1.92492e-14	8.02149e-13	4.72759e-13	3.61747e-07
TNFSF13B	1239.56	-2.69914	0.353523	-7.63497	2.25881e-14	9.39206e-13	5.53535e-13	3.61747e-07
RAP2B	738.806	1.31192	0.171865	7.63347	2.28526e-14	9.48107e-13	5.58781e-13	3.61747e-07
CST2	505.775	-5.62892	0.737984	-7.62743	2.39477e-14	9.91351e-13	5.84267e-13	3.61747e-07
FAM102B	435.071	2.02284	0.265432	7.62094	2.51836e-14	1.04022e-12	6.1307e-13	3.61747e-07
TLR7	79.9913	2.57817	0.33851	7.61622	2.61203e-14	1.07655e-12	6.34478e-13	3.61747e-07
C1QC	4269.02	2.22642	0.292417	7.61386	2.66033e-14	1.09166e-12	6.43388e-13	3.61747e-07
IGSF5	96.7135	-3.0631	0.4023	-7.61397	2.65811e-14	1.09166e-12	6.43388e-13	3.61747e-07
HCLS1	993.999	1.76496	0.231831	7.61312	2.67564e-14	1.09556e-12	6.45682e-13	3.61747e-07
CD37	316.469	1.89726	0.249484	7.60474	2.85476e-14	1.16636e-12	6.8741e-13	3.61747e-07
CYP27B1	168.645	-1.90719	0.251285	-7.58974	3.20537e-14	1.30676e-12	7.7016e-13	3.61747e-07
POU2F2	100.524	1.74739	0.23033	7.5865	3.28672e-14	1.3352e-12	7.86918e-13	3.61747e-07
CARD16	172.978	2.35772	0.310783	7.58639	3.28933e-14	1.3352e-12	7.86918e-13	3.61747e-07
DLG2	349.151	2.54311	0.33529	7.58483	3.32926e-14	1.34849e-12	7.94755e-13	3.61747e-07
BATF3	46.8466	2.00381	0.264201	7.58439	3.3405e-14	1.35014e-12	7.95724e-13	3.61747e-07
C11orf21	15.111	2.30633	0.3042	7.58162	3.41256e-14	1.3763e-12	8.11143e-13	3.61747e-07
CDSN	22.3156	5.22233	0.689212	7.57725	3.52965e-14	1.42048e-12	8.37179e-13	3.61747e-07
HTR1B	11.7273	3.90232	0.515305	7.57283	3.65172e-14	1.46646e-12	8.64281e-13	3.61747e-07
CIB4	125.467	-2.69913	0.356573	-7.56963	3.74301e-14	1.49992e-12	8.83999e-13	3.61747e-07
KCNN4	101.864	2.5722	0.339928	7.56691	3.8222e-14	1.52839e-12	9.0078e-13	3.61747e-07
GBP4	826.344	2.11174	0.279377	7.55873	4.07024e-14	1.62412e-12	9.57201e-13	3.61747e-07
TGFBR3L	33.025	-3.36917	0.445898	-7.55593	4.15893e-14	1.65599e-12	9.75985e-13	3.61747e-07
C4orf50	58.818	-4.01509	0.531613	-7.55265	4.26488e-14	1.69459e-12	9.98732e-13	3.61747e-07
TYROBP	1477.19	2.02082	0.267692	7.54904	4.38468e-14	1.73852e-12	1.02462e-12	3.61747e-07
NFKBIZ	229.69	2.35101	0.311597	7.54503	4.52199e-14	1.78918e-12	1.05448e-12	3.61747e-07
OSGIN2	1083.5	1.2728	0.168789	7.54074	4.67307e-14	1.84508e-12	1.08742e-12	3.61747e-07
C1QB	5466.04	2.2477	0.298089	7.54034	4.68743e-14	1.84687e-12	1.08848e-12	3.61747e-07
BATF	53.5818	2.61226	0.346617	7.53645	4.82955e-14	1.89888e-12	1.11914e-12	3.61747e-07
TRAT1	7.97801	3.35521	0.445219	7.53609	4.84276e-14	1.9001e-12	1.11985e-12	3.61747e-07
SERPINI1	744.656	2.0865	0.276901	7.5352	4.87574e-14	1.90906e-12	1.12513e-12	3.61747e-07
CD74	42266.9	2.21554	0.294135	7.53241	4.98136e-14	1.94636e-12	1.14711e-12	3.61747e-07
PIK3CG	38.555	1.9165	0.254657	7.52582	5.23916e-14	2.04284e-12	1.20398e-12	3.61747e-07
IGFBP4	7845.09	2.22438	0.295595	7.5251	5.26819e-14	2.0499e-12	1.20814e-12	3.61747e-07
IL10	18.7536	2.83787	0.377273	7.52206	5.39192e-14	2.09371e-12	1.23396e-12	3.61747e-07
ZNF711	1431.02	-2.864	0.38085	-7.52004	5.476e-14	2.12198e-12	1.25062e-12	3.61747e-07
LHB	21.9377	-3.88948	0.517309	-7.51869	5.53291e-14	2.13962e-12	1.26102e-12	3.61747e-07
MXRA5	3433.88	-3.24233	0.432238	-7.50126	6.32054e-14	2.43918e-12	1.43757e-12	3.61747e-07
CD1C	23.4777	3.93683	0.525503	7.49156	6.80618e-14	2.61586e-12	1.54169e-12	3.61747e-07
GMFB	1837.52	-0.96978	0.129448	-7.49164	6.80205e-14	2.61586e-12	1.54169e-12	3.61747e-07
SPI1	548.235	1.91942	0.256232	7.49097	6.83666e-14	2.62221e-12	1.54544e-12	3.61747e-07
SYNGR2	2952.39	0.958098	0.127961	7.48743	7.02338e-14	2.68287e-12	1.58119e-12	3.61747e-07
HPX	66.8683	-2.5928	0.346284	-7.48749	7.02028e-14	2.68287e-12	1.58119e-12	3.61747e-07
SHROOM3	455.225	-2.70066	0.360884	-7.48346	7.23924e-14	2.75972e-12	1.62648e-12	3.61747e-07
BABAM2	3736.06	1.45056	0.193859	7.48253	7.29072e-14	2.77372e-12	1.63473e-12	3.61747e-07
VSIG4	955.151	2.35625	0.315084	7.47818	7.53586e-14	2.86119e-12	1.68629e-12	3.61747e-07
CPQ	2312.64	1.23841	0.165859	7.46668	8.22426e-14	3.11626e-12	1.83662e-12	3.61747e-07
RNF126	2019.83	-0.855987	0.114749	-7.45967	8.67407e-14	3.28009e-12	1.93317e-12	3.61747e-07
HTR2A	29.8082	4.09669	0.549248	7.45873	8.73628e-14	3.29573e-12	1.94239e-12	3.61747e-07
NSMF	3337.77	-2.76904	0.371259	-7.45851	8.75051e-14	3.29573e-12	1.94239e-12	3.61747e-07
SALL2	379.787	-2.30042	0.308486	-7.45714	8.84202e-14	3.31214e-12	1.95206e-12	3.61747e-07
CSF2RA	157.824	2.1467	0.287874	7.45707	8.84693e-14	3.31214e-12	1.95206e-12	3.61747e-07
PNMA8B	1478.25	-2.2488	0.301559	-7.45725	8.83476e-14	3.31214e-12	1.95206e-12	3.61747e-07
KLHDC8A	1128.93	-3.8467	0.516051	-7.45412	9.04693e-14	3.38028e-12	1.99222e-12	3.61747e-07
PLCB2	321.515	1.88781	0.253762	7.43932	1.01207e-13	3.77398e-12	2.22425e-12	3.61747e-07
FAM25A	17.1091	5.68632	0.765389	7.42932	1.09161e-13	4.06251e-12	2.3943e-12	3.61747e-07
HLA-DQA1	1022.52	2.33874	0.315011	7.42432	1.1336e-13	4.21045e-12	2.48149e-12	3.61747e-07
SOAT1	17131.3	-1.31348	0.176923	-7.42401	1.13627e-13	4.21203e-12	2.48242e-12	3.61747e-07
NKX2-5	28.7546	-6.35583	0.856498	-7.42072	1.16484e-13	4.30946e-12	2.53985e-12	3.61747e-07
RFX6	18.6695	-4.68489	0.631667	-7.41671	1.20066e-13	4.43323e-12	2.61279e-12	3.61747e-07
CACNB2	562.387	-2.31167	0.311695	-7.41644	1.20306e-13	4.43339e-12	2.61289e-12	3.61747e-07
EFEMP1	3131.35	2.5366	0.342048	7.41591	1.20788e-13	4.44246e-12	2.61823e-12	3.61747e-07
FAM20A	140.868	2.52247	0.340335	7.41173	1.24665e-13	4.57608e-12	2.69698e-12	3.61747e-07
TPSB2	406.234	3.9347	0.530996	7.41002	1.26277e-13	4.62621e-12	2.72653e-12	3.61747e-07
C3orf70	168.086	-1.87907	0.253607	-7.40939	1.2688e-13	4.63928e-12	2.73423e-12	3.61747e-07
GPRIN3	217.543	2.11753	0.28598	7.40447	1.31672e-13	4.80514e-12	2.83198e-12	3.61747e-07
IFFO2	997.7	-1.48171	0.200303	-7.39732	1.38956e-13	5.06111e-12	2.98284e-12	3.61747e-07
GZMB	49.597	2.70056	0.36525	7.39374	1.42755e-13	5.18944e-12	3.05847e-12	3.61747e-07
ARL5B	1242.26	-1.10563	0.149552	-7.39294	1.43621e-13	5.21085e-12	3.07109e-12	3.61747e-07
THPO	41.9611	-3.83559	0.518963	-7.39088	1.45864e-13	5.28203e-12	3.11304e-12	3.61747e-07
ADGRE1	19.7178	2.66438	0.360969	7.38117	1.56908e-13	5.67103e-12	3.34231e-12	3.61747e-07
MYO1G	90.2386	1.70471	0.231059	7.37781	1.60915e-13	5.80467e-12	3.42107e-12	3.61747e-07
SH3D19	1019	1.49714	0.202982	7.37575	1.63417e-13	5.88362e-12	3.4676e-12	3.61747e-07
LRP4	599.868	1.47976	0.200672	7.37402	1.65556e-13	5.94926e-12	3.50628e-12	3.61747e-07
APOL3	504.353	1.39443	0.189134	7.3727	1.67203e-13	5.99698e-12	3.53441e-12	3.61747e-07
NTN5	99.9578	-2.73847	0.371497	-7.37145	1.68788e-13	6.04229e-12	3.56111e-12	3.61747e-07
CCDC83	10.3748	-5.94955	0.807195	-7.37065	1.69796e-13	6.0668e-12	3.57556e-12	3.61747e-07
CD83	2660.89	-2.07281	0.281268	-7.36951	1.71253e-13	6.10728e-12	3.59942e-12	3.61747e-07
SIT1	20.574	3.05924	0.415432	7.364	1.7848e-13	6.35293e-12	3.7442e-12	3.61747e-07
GPNMB	2171.07	2.44314	0.331825	7.36274	1.80167e-13	6.40087e-12	3.77245e-12	3.61747e-07
ICAM3	17.3491	1.56939	0.21317	7.36215	1.80968e-13	6.4172e-12	3.78207e-12	3.61747e-07
WIF1	699.171	-4.91685	0.668106	-7.3594	1.84744e-13	6.53876e-12	3.85372e-12	3.61747e-07
COL20A1	27.3405	-3.47435	0.472116	-7.35911	1.85137e-13	6.54034e-12	3.85465e-12	3.61747e-07
CHRNA3	57.8202	-3.23346	0.439473	-7.35758	1.87274e-13	6.60094e-12	3.89036e-12	3.61747e-07
NXPH4	122.667	-3.41296	0.463882	-7.35738	1.87555e-13	6.60094e-12	3.89036e-12	3.61747e-07
SEPHS1	2644.73	-0.809678	0.110143	-7.35118	1.96466e-13	6.90165e-12	4.06759e-12	3.61747e-07
PIEZO2	622.654	2.81555	0.383096	7.34948	1.98979e-13	6.97688e-12	4.11193e-12	3.61747e-07
GPR18	6.48676	2.5597	0.34841	7.34681	2.02991e-13	7.10431e-12	4.18703e-12	3.61747e-07
IQCA1	171.21	-2.90522	0.395721	-7.34158	2.1108e-13	7.37367e-12	4.34578e-12	3.61747e-07
CD84	184.813	2.01828	0.275058	7.33764	2.17397e-13	7.58028e-12	4.46755e-12	3.61747e-07
CD68	47.8356	2.0992	0.286111	7.33701	2.18413e-13	7.60158e-12	4.4801e-12	3.61747e-07
IGSF6	253.264	1.77204	0.241662	7.33271	2.25541e-13	7.83515e-12	4.61776e-12	3.61747e-07
CLEC10A	86.5063	3.30987	0.451412	7.33226	2.26308e-13	7.84731e-12	4.62493e-12	3.61747e-07
SLC16A5	39.2646	1.9639	0.267876	7.33137	2.27808e-13	7.88477e-12	4.64701e-12	3.61747e-07
B4GALNT4	204.659	-3.68974	0.50332	-7.33082	2.2875e-13	7.90282e-12	4.65765e-12	3.61747e-07
DERA	1175.71	0.821934	0.112233	7.32346	2.41659e-13	8.33347e-12	4.91145e-12	3.61747e-07
TNXB	3019.79	-1.79161	0.244854	-7.31708	2.5343e-13	8.72339e-12	5.14126e-12	3.61747e-07
CD300C	30.3322	2.10766	0.288082	7.31617	2.55145e-13	8.76634e-12	5.16658e-12	3.61747e-07
TLL1	110.651	2.59503	0.354958	7.31081	2.65528e-13	9.10107e-12	5.36385e-12	3.61747e-07
TNFAIP8L2	130.71	2.08939	0.285801	7.31065	2.65855e-13	9.10107e-12	5.36385e-12	3.61747e-07
AATK	437.577	-2.21784	0.30348	-7.30804	2.71065e-13	9.26252e-12	5.45901e-12	3.61747e-07
PLS3	3512.53	1.38334	0.189396	7.30398	2.79372e-13	9.52908e-12	5.6161e-12	3.61747e-07
LTB4R2	103.011	-1.56571	0.214404	-7.3026	2.82269e-13	9.61043e-12	5.66405e-12	3.61747e-07
SYS1	2511.41	0.845574	0.115811	7.30135	2.84893e-13	9.68224e-12	5.70638e-12	3.61747e-07
PDZD4	245.252	-2.65058	0.363237	-7.29712	2.93984e-13	9.96911e-12	5.87544e-12	3.61747e-07
HVCN1	146.459	1.46804	0.201186	7.29694	2.94395e-13	9.96911e-12	5.87544e-12	3.61747e-07
CD274	75.5977	1.77891	0.243849	7.29513	2.98369e-13	1.00855e-11	5.94404e-12	3.61747e-07
PLBD1	175.314	2.11024	0.289567	7.28756	3.15621e-13	1.06495e-11	6.27645e-12	3.61747e-07
DNAJC9	885.949	-0.956081	0.131217	-7.28625	3.18695e-13	1.0734e-11	6.32622e-12	3.61747e-07
MMP17	434.904	-3.52294	0.483534	-7.28581	3.1975e-13	1.07502e-11	6.33582e-12	3.61747e-07
CELF3	14.5541	4.78368	0.656993	7.28118	3.3092e-13	1.11059e-11	6.54544e-12	3.61747e-07
DENND3	489.817	1.19356	0.1641	7.27334	3.50717e-13	1.17493e-11	6.92465e-12	3.61747e-07
ALOX5	211.77	1.99874	0.274971	7.2689	3.62421e-13	1.21198e-11	7.14299e-12	3.61747e-07
TMEM120B	1247.59	-0.989339	0.136189	-7.26444	3.74599e-13	1.25048e-11	7.3699e-12	3.61747e-07
CBX4	2278.09	-1.0021	0.138015	-7.26079	3.84843e-13	1.2824e-11	7.55802e-12	3.61747e-07
RAB37	107.513	2.36802	0.326429	7.25433	4.03667e-13	1.34275e-11	7.91367e-12	3.61747e-07
GIMAP8	444.236	1.44975	0.199875	7.25326	4.06864e-13	1.35099e-11	7.96226e-12	3.61747e-07
GPT	246.416	2.1362	0.294821	7.24575	4.30062e-13	1.4255e-11	8.40139e-12	3.61747e-07
NECTIN2	7329.8	-1.00442	0.138686	-7.24242	4.40759e-13	1.45839e-11	8.59521e-12	3.61747e-07
EOMES	99.0774	3.01296	0.416268	7.23804	4.55224e-13	1.5036e-11	8.86168e-12	3.61747e-07
TIGIT	37.576	3.18113	0.439728	7.23431	4.67888e-13	1.54272e-11	9.09223e-12	3.61747e-07
RIN3	2918.06	1.68552	0.233025	7.23322	4.71687e-13	1.55252e-11	9.15001e-12	3.61747e-07
SIRPB2	49.7295	1.96186	0.271278	7.23195	4.76116e-13	1.56436e-11	9.21978e-12	3.61747e-07
PARVG	228.441	1.83506	0.25384	7.2292	4.85848e-13	1.59355e-11	9.39181e-12	3.61747e-07
P2RY14	36.4845	1.49095	0.206287	7.22758	4.91684e-13	1.60988e-11	9.48807e-12	3.61747e-07
ADGRB1	2270.11	-3.95712	0.547684	-7.22519	5.00383e-13	1.63551e-11	9.63915e-12	3.61747e-07
APEX2	1930.45	1.16195	0.16083	7.22471	5.02182e-13	1.63854e-11	9.65701e-12	3.61747e-07
PCK1	46.4789	-3.60683	0.499805	-7.21649	5.33465e-13	1.73577e-11	1.023e-11	3.61747e-07
PSMB10	1178.85	1.27227	0.176303	7.2164	5.33828e-13	1.73577e-11	1.023e-11	3.61747e-07
FABP3	10092.3	2.74799	0.380884	7.21478	5.40216e-13	1.75351e-11	1.03346e-11	3.61747e-07
MID1IP1	5939.22	1.85672	0.257414	7.21295	5.47516e-13	1.77414e-11	1.04562e-11	3.61747e-07
NDRG4	19259.9	2.89436	0.401376	7.2111	5.55003e-13	1.7953e-11	1.05809e-11	3.61747e-07
GPR176	247.575	1.79077	0.248378	7.20987	5.60068e-13	1.80858e-11	1.06591e-11	3.61747e-07
PRKCA	4438.65	2.13514	0.296661	7.19725	6.1441e-13	1.98066e-11	1.16733e-11	3.61747e-07
NAGS	130.447	-2.59993	0.361289	-7.19627	6.18823e-13	1.99146e-11	1.1737e-11	3.61747e-07
EIF2B2	1861.07	-0.889212	0.123598	-7.1944	6.27362e-13	2.01549e-11	1.18786e-11	3.61747e-07
TMEM72	6.24364	5.00457	0.695887	7.19165	6.4013e-13	2.053e-11	1.20997e-11	3.61747e-07
SPRY4	3674.91	-1.55724	0.2167	-7.18617	6.6636e-13	2.13349e-11	1.2574e-11	3.61747e-07
CX3CR1	217.034	2.84769	0.396396	7.18396	6.77198e-13	2.1645e-11	1.27568e-11	3.61747e-07
ORAI2	2247.91	1.17886	0.164177	7.18045	6.94833e-13	2.21709e-11	1.30668e-11	3.61747e-07
EPOP	323.553	-2.11957	0.295404	-7.17515	7.22257e-13	2.30069e-11	1.35595e-11	3.61747e-07
ANPEP	304.833	2.64205	0.368593	7.16791	7.61496e-13	2.42158e-11	1.4272e-11	3.61747e-07
SLA2	42.1414	1.87627	0.261993	7.16152	7.97864e-13	2.53295e-11	1.49283e-11	3.61747e-07
MARCHF1	194.017	1.54943	0.216379	7.1607	8.02648e-13	2.54384e-11	1.49925e-11	3.61747e-07
DOK2	162.224	2.11591	0.295776	7.15377	8.44241e-13	2.67116e-11	1.57429e-11	3.61747e-07
TNFSF11	15.3157	4.75762	0.665234	7.15181	8.56419e-13	2.70513e-11	1.59431e-11	3.61747e-07
FAM177A1	1611.8	-0.928535	0.129875	-7.14947	8.71163e-13	2.74709e-11	1.61904e-11	3.61747e-07
LAMC3	4452.24	-2.85208	0.399688	-7.13575	9.62612e-13	3.03037e-11	1.786e-11	3.61747e-07
NETO2	2279.74	-1.85931	0.260628	-7.13397	9.75148e-13	3.0647e-11	1.80623e-11	3.61747e-07
COL14A1	6311.18	3.22622	0.452654	7.12734	1.02328e-12	3.21061e-11	1.89222e-11	3.61747e-07
POLE3	3175.44	-0.84116	0.118038	-7.12621	1.03173e-12	3.23172e-11	1.90466e-11	3.61747e-07
CPNE4	569.989	3.4033	0.478351	7.11465	1.12196e-12	3.5085e-11	2.06779e-11	3.61747e-07
FPR3	222.983	1.85073	0.260284	7.11044	1.15678e-12	3.61137e-11	2.12842e-11	3.61747e-07
PTGDR	30.5993	3.39889	0.478038	7.11009	1.15964e-12	3.6143e-11	2.13014e-11	3.61747e-07
SLIT2	1751.77	-2.89463	0.40718	-7.10895	1.16927e-12	3.6383e-11	2.14429e-11	3.61747e-07
SLC9A9	480.933	1.6484	0.231898	7.10831	1.1747e-12	3.64916e-11	2.15068e-11	3.61747e-07
ATP10A	662.989	-3.16554	0.445344	-7.10806	1.17683e-12	3.64971e-11	2.15101e-11	3.61747e-07
SORCS1	404.986	-5.26897	0.741572	-7.10514	1.20203e-12	3.72175e-11	2.19347e-11	3.61747e-07
ARMC9	929.796	1.28903	0.18158	7.09895	1.25712e-12	3.8859e-11	2.29021e-11	3.61747e-07
CTSV	275.543	-2.34093	0.329771	-7.09865	1.2598e-12	3.88781e-11	2.29134e-11	3.61747e-07
RNF144B	324.438	1.5286	0.215375	7.09737	1.27152e-12	3.91752e-11	2.30885e-11	3.61747e-07
NGEF	2768.98	-3.27043	0.461204	-7.09106	1.3309e-12	4.09376e-11	2.41272e-11	3.61747e-07
COL11A1	1380.41	-4.37581	0.617129	-7.09059	1.33539e-12	4.10087e-11	2.41691e-11	3.61747e-07
FAM78A	215.844	1.31803	0.186128	7.08132	1.42787e-12	4.37772e-11	2.58008e-11	3.61747e-07
TUBB8	7.56091	-2.50942	0.354479	-7.07917	1.45022e-12	4.439e-11	2.61619e-11	3.61747e-07
GIMAP4	821.079	1.16815	0.165051	7.0775	1.46776e-12	4.48538e-11	2.64352e-11	3.61747e-07
CTXND1	515.369	-4.11424	0.581435	-7.07602	1.48358e-12	4.52637e-11	2.66769e-11	3.61747e-07
TNFRSF18	22.8046	2.57436	0.36386	7.07515	1.49292e-12	4.54748e-11	2.68012e-11	3.61747e-07
AQP2	388.429	-5.40081	0.763533	-7.07344	1.51135e-12	4.59618e-11	2.70882e-11	3.61747e-07
SLC49A3	176.105	1.46033	0.206489	7.07218	1.52514e-12	4.6306e-11	2.72912e-11	3.61747e-07
ROPN1L	49.5325	-2.56552	0.362937	-7.06878	1.56304e-12	4.73802e-11	2.79243e-11	3.61747e-07
PDE6D	1274.4	-0.844531	0.119508	-7.06674	1.5862e-12	4.80048e-11	2.82923e-11	3.61747e-07
GPR183	215.756	2.29405	0.324713	7.06485	1.60795e-12	4.85849e-11	2.86343e-11	3.61747e-07
RIPK3	35.7641	1.56685	0.221855	7.06248	1.63554e-12	4.93392e-11	2.90788e-11	3.61747e-07
HAAO	103.753	2.04788	0.289999	7.06169	1.64491e-12	4.95423e-11	2.91985e-11	3.61747e-07
HSPD1	54132.8	-1.49792	0.212158	-7.0604	1.66028e-12	4.98455e-11	2.93772e-11	3.61747e-07
HMX3	108.134	-3.66395	0.518937	-7.06048	1.65924e-12	4.98455e-11	2.93772e-11	3.61747e-07
VAV2	4483.05	-1.52514	0.216351	-7.04937	1.79726e-12	5.38718e-11	3.17502e-11	3.61747e-07
SYTL3	115.604	1.35935	0.192841	7.04906	1.80133e-12	5.39078e-11	3.17714e-11	3.61747e-07
DACH1	505.519	-2.75858	0.391461	-7.04687	1.82991e-12	5.46763e-11	3.22243e-11	3.61747e-07
IPCEF1	26.3552	1.75459	0.249028	7.04574	1.84476e-12	5.50325e-11	3.24342e-11	3.61747e-07
C1orf162	342.406	1.91373	0.271633	7.04527	1.85103e-12	5.51319e-11	3.24928e-11	3.61747e-07
MREG	1043.77	-2.12629	0.301833	-7.0446	1.85993e-12	5.53094e-11	3.25974e-11	3.61747e-07
PDE7A	447.76	1.37799	0.195748	7.0396	1.92795e-12	5.72415e-11	3.37361e-11	3.61747e-07
SPRR2B	154.336	-5.70325	0.81087	-7.03349	2.01427e-12	5.971e-11	3.5191e-11	3.61747e-07
SECTM1	149.882	1.98439	0.282193	7.03201	2.03573e-12	6.02513e-11	3.551e-11	3.61747e-07
SFTPC	11.2689	-4.30622	0.612457	-7.03105	2.04979e-12	6.0572e-11	3.5699e-11	3.61747e-07
H2BC4	83.9045	-2.73437	0.389072	-7.02793	2.09626e-12	6.18478e-11	3.64509e-11	3.61747e-07
STAP1	7.04616	2.78011	0.395693	7.02593	2.12653e-12	6.26425e-11	3.69193e-11	3.61747e-07
HCST	145.884	1.97903	0.281782	7.02326	2.16749e-12	6.37493e-11	3.75716e-11	3.61747e-07
SMS	12701.3	-1.35567	0.193044	-7.02258	2.17816e-12	6.3963e-11	3.76975e-11	3.61747e-07
FEZF1	31.9137	-4.88963	0.696707	-7.01821	2.24728e-12	6.58899e-11	3.88332e-11	3.61747e-07
DMTN	2394.33	2.07952	0.296426	7.01531	2.29439e-12	6.71663e-11	3.95854e-11	3.61747e-07
ZNF683	20.9642	2.95172	0.420854	7.01364	2.32193e-12	6.78667e-11	3.99983e-11	3.61747e-07
SLC7A1	1397.33	-1.84709	0.263516	-7.00939	2.39357e-12	6.9852e-11	4.11683e-11	3.61747e-07
PLA2G15	1970.3	1.14031	0.162746	7.00666	2.44067e-12	7.11161e-11	4.19133e-11	3.61747e-07
TSPAN10	324.286	2.31359	0.33026	7.00534	2.46388e-12	7.16813e-11	4.22465e-11	3.61747e-07
KCNN1	161.585	-3.52793	0.503909	-7.00114	2.53894e-12	7.3751e-11	4.34662e-11	3.61747e-07
CD28	50.0845	2.50081	0.357389	6.99745	2.60663e-12	7.56002e-11	4.45561e-11	3.61747e-07
F8	1668.28	1.62054	0.231616	6.99665	2.62147e-12	7.59134e-11	4.47407e-11	3.61747e-07
PLAU	289.709	1.81419	0.259322	6.99591	2.63544e-12	7.62006e-11	4.491e-11	3.61747e-07
AJAP1	143.315	-3.50566	0.501157	-6.99514	2.65e-12	7.6504e-11	4.50888e-11	3.61747e-07
ZNF653	440.756	-0.853937	0.122105	-6.99347	2.68178e-12	7.73028e-11	4.55596e-11	3.61747e-07
GRM8	27.2816	3.86467	0.553305	6.98469	2.85484e-12	8.2165e-11	4.84252e-11	3.61747e-07
CBX3	10737.9	-0.87408	0.125226	-6.98002	2.95128e-12	8.48109e-11	4.99846e-11	3.61747e-07
PIK3IP1	2507.93	1.54344	0.221181	6.97815	2.99102e-12	8.58216e-11	5.05803e-11	3.61747e-07
CAV2	1041.68	1.67356	0.239926	6.97532	3.05179e-12	8.74321e-11	5.15294e-11	3.61747e-07
PPRC1	1838.24	-0.785823	0.112724	-6.97121	3.14234e-12	8.9889e-11	5.29774e-11	3.61747e-07
SERPING1	2354.96	1.8344	0.263155	6.97079	3.15166e-12	9.00188e-11	5.30539e-11	3.61747e-07
BCL11A	243.221	-2.35148	0.337402	-6.96936	3.18379e-12	9.07983e-11	5.35133e-11	3.61747e-07
CIT	3123.85	-1.6257	0.233348	-6.96686	3.24088e-12	9.22519e-11	5.437e-11	3.61747e-07
HOXC12	120.34	-6.12901	0.879758	-6.9667	3.24457e-12	9.22519e-11	5.437e-11	3.61747e-07
SH2D1B	8.77275	2.10419	0.302085	6.96554	3.27138e-12	9.28737e-11	5.47365e-11	3.61747e-07
PLCXD3	1715.15	3.38701	0.486369	6.96386	3.31063e-12	9.38462e-11	5.53097e-11	3.61747e-07
C6	188.812	3.84845	0.552811	6.9616	3.36427e-12	9.52231e-11	5.61211e-11	3.61747e-07
MSI2	5213.36	-0.847184	0.121714	-6.96048	3.39121e-12	9.58413e-11	5.64855e-11	3.61747e-07
YBX2	45.7171	-2.8281	0.406331	-6.96008	3.40069e-12	9.59649e-11	5.65583e-11	3.61747e-07
KHK	408.338	2.36345	0.339638	6.95874	3.43332e-12	9.67402e-11	5.70153e-11	3.61747e-07
HMGCLL1	18.3602	5.88806	0.846377	6.95679	3.48123e-12	9.79433e-11	5.77244e-11	3.61747e-07
GAPT	42.6213	2.81076	0.404054	6.9564	3.49074e-12	9.80643e-11	5.77956e-11	3.61747e-07
MS4A1	15.1019	3.2887	0.472915	6.95412	3.54768e-12	9.9515e-11	5.86507e-11	3.61747e-07
FBXW10	41.9306	-2.99997	0.431635	-6.95025	3.64649e-12	1.02134e-10	6.01943e-11	3.61747e-07
CIITA	417.262	1.65952	0.239003	6.94353	3.82433e-12	1.06956e-10	6.30362e-11	3.61747e-07
CD86	245.499	1.63918	0.236284	6.93731	3.99624e-12	1.11598e-10	6.57718e-11	3.61747e-07
CHSY1	4052.01	-1.17772	0.16979	-6.93636	4.02337e-12	1.12189e-10	6.61202e-11	3.61747e-07
FCGR3A	1245.29	2.08746	0.301025	6.93453	4.07572e-12	1.1348e-10	6.68813e-11	3.61747e-07
CTSS	2284.54	1.70742	0.246313	6.93189	4.15256e-12	1.15448e-10	6.80413e-11	3.61747e-07
CAPN1	3726.89	1.00801	0.145437	6.93086	4.18281e-12	1.16118e-10	6.84357e-11	3.61747e-07
SEPTIN6	9114.96	-1.14134	0.164729	-6.9286	4.25021e-12	1.17815e-10	6.94359e-11	3.61747e-07
ENC1	3743.7	-2.11604	0.305634	-6.92346	4.40756e-12	1.21997e-10	7.19006e-11	3.61747e-07
TECRL	29.7586	6.86464	0.991555	6.92311	4.41837e-12	1.22116e-10	7.19709e-11	3.61747e-07
FOXD4	56.7148	-2.66834	0.385462	-6.92245	4.43913e-12	1.22509e-10	7.22028e-11	3.61747e-07
P2RY6	54.048	2.1141	0.305447	6.92133	4.47423e-12	1.23297e-10	7.2667e-11	3.61747e-07
IFI30	78.2193	1.63983	0.237068	6.91712	4.60909e-12	1.26828e-10	7.47477e-11	3.61747e-07
ABHD12	4124.32	0.932662	0.134838	6.9169	4.61626e-12	1.26839e-10	7.47545e-11	3.61747e-07
DOK5	149.933	2.73717	0.39583	6.91501	4.67828e-12	1.28356e-10	7.56483e-11	3.61747e-07
TBC1D10C	101.868	1.66725	0.241157	6.91354	4.72704e-12	1.29504e-10	7.63253e-11	3.61747e-07
AC008687.4	8.37228	-4.13862	0.598921	-6.91012	4.84248e-12	1.32474e-10	7.80754e-11	3.61747e-07
ADPRH	331.441	1.35148	0.195599	6.90944	4.86556e-12	1.32912e-10	7.83335e-11	3.61747e-07
RGS10	413.025	1.68823	0.244571	6.90279	5.09918e-12	1.39091e-10	8.19755e-11	3.61747e-07
TWNK	706.907	-0.802619	0.116318	-6.90023	5.19193e-12	1.41211e-10	8.32251e-11	3.61747e-07
BMS1	2056.85	-0.555523	0.0805076	-6.90026	5.19076e-12	1.41211e-10	8.32251e-11	3.61747e-07
POSTN	5001.95	3.50688	0.508464	6.897	5.31137e-12	1.44251e-10	8.50167e-11	3.61747e-07
APBB1IP	205.597	1.9823	0.287473	6.89559	5.36415e-12	1.45475e-10	8.57376e-11	3.61747e-07
HLA-DRA	11303.1	2.05211	0.297611	6.89528	5.37585e-12	1.45582e-10	8.58007e-11	3.61747e-07
NLK	2280.94	-1.22141	0.177159	-6.89441	5.409e-12	1.46269e-10	8.62057e-11	3.61747e-07
ITGA4	87.8832	1.83839	0.266763	6.89148	5.52154e-12	1.49097e-10	8.78728e-11	3.61747e-07
RXFP3	25.317	-4.01104	0.582496	-6.88595	5.7404e-12	1.54785e-10	9.12248e-11	3.61747e-07
WNT4	1799.47	-2.94896	0.428326	-6.88486	5.78462e-12	1.55754e-10	9.17958e-11	3.61747e-07
PTPRM	1573.5	1.03057	0.149771	6.88098	5.94419e-12	1.59821e-10	9.41932e-11	3.61747e-07
KLRD1	69.1615	2.12946	0.309541	6.87941	6.00989e-12	1.61357e-10	9.50982e-11	3.61747e-07
MFNG	293.17	1.12604	0.163707	6.87841	6.05247e-12	1.62268e-10	9.56352e-11	3.61747e-07
NPL	315.025	1.3786	0.200543	6.87432	6.22867e-12	1.66754e-10	9.82792e-11	3.61747e-07
FASLG	12.2802	3.27042	0.475985	6.87085	6.38187e-12	1.70371e-10	1.0041e-10	3.61747e-07
KCNK3	19599.4	-1.6997	0.247372	-6.87103	6.37422e-12	1.70371e-10	1.0041e-10	3.61747e-07
ECI2	6089.94	-1.10724	0.161187	-6.86928	6.45258e-12	1.72014e-10	1.01379e-10	3.61747e-07
UBE2QL1	632.496	-2.54042	0.369865	-6.8685	6.48796e-12	1.72712e-10	1.0179e-10	3.61747e-07
BRPF3	3681.88	-1.46844	0.21421	-6.85516	7.1234e-12	1.89359e-10	1.11602e-10	3.61747e-07
ARL6IP5	9008.25	0.849485	0.123995	6.85095	7.33616e-12	1.9474e-10	1.14773e-10	3.61747e-07
NPPC	17.4878	-2.92458	0.426934	-6.85018	7.37558e-12	1.9551e-10	1.15227e-10	3.61747e-07
PNCK	130.657	-3.07826	0.449594	-6.84676	7.55417e-12	1.99962e-10	1.17851e-10	3.61747e-07
PTPRS	4678.57	-1.4206	0.207522	-6.84553	7.61907e-12	2.01396e-10	1.18696e-10	3.61747e-07
LGALS3BP	39308.4	1.62748	0.2379	6.84103	7.8625e-12	2.07539e-10	1.22316e-10	3.61747e-07
SLF2	2107.52	-0.905899	0.132497	-6.83715	8.07831e-12	2.12937e-10	1.25497e-10	3.61747e-07
GALNT9	230.964	-4.01025	0.586672	-6.83559	8.16679e-12	2.14967e-10	1.26694e-10	3.61747e-07
RHBDL3	808.115	-2.39134	0.349856	-6.83522	8.18809e-12	2.15226e-10	1.26847e-10	3.61747e-07
SLC17A7	75.6472	-2.60031	0.380528	-6.83343	8.29084e-12	2.17623e-10	1.28259e-10	3.61747e-07
GSN	17292.7	1.07008	0.15662	6.83232	8.35501e-12	2.19002e-10	1.29072e-10	3.61747e-07
HLA-E	24267	1.35606	0.198509	6.8312	8.42051e-12	2.20411e-10	1.29902e-10	3.61747e-07
COL21A1	231.343	2.67598	0.392074	6.8252	8.78024e-12	2.29507e-10	1.35264e-10	3.61747e-07
GATA3	290.876	-2.82972	0.414789	-6.82208	8.97324e-12	2.34226e-10	1.38045e-10	3.61747e-07
FUCA1	2443.59	1.0293	0.150937	6.81939	9.1429e-12	2.38324e-10	1.4046e-10	3.61747e-07
LY86	165.05	1.9373	0.284135	6.81823	9.21695e-12	2.39922e-10	1.41401e-10	3.61747e-07
ARHGAP12	2726.42	-0.976325	0.143201	-6.81786	9.24047e-12	2.40201e-10	1.41566e-10	3.61747e-07
CLPTM1	11564.2	-0.828653	0.121676	-6.81034	9.73712e-12	2.52762e-10	1.48969e-10	3.61747e-07
C1QL2	14.0156	-4.35964	0.640276	-6.809	9.82817e-12	2.54773e-10	1.50154e-10	3.61747e-07
NEK6	1104.77	-2.25158	0.330813	-6.80619	1.00214e-11	2.59069e-10	1.52686e-10	3.61747e-07
AIM2	15.3768	2.81474	0.413546	6.80635	1.00106e-11	2.59069e-10	1.52686e-10	3.61747e-07
RNF39	535.823	2.42575	0.356709	6.80035	1.04366e-11	2.6943e-10	1.58793e-10	3.61747e-07
PIP4P2	1299.01	1.18175	0.173841	6.79784	1.06196e-11	2.73778e-10	1.61355e-10	3.61747e-07
GIMAP5	36.7752	1.34608	0.198038	6.79709	1.06754e-11	2.74841e-10	1.61982e-10	3.61747e-07
B3GNT3	55.5194	4.06365	0.598233	6.79276	1.10011e-11	2.82839e-10	1.66695e-10	3.61747e-07
POR	31056.1	-1.08194	0.159306	-6.79155	1.10935e-11	2.84823e-10	1.67865e-10	3.61747e-07
TM6SF1	40.9486	1.82174	0.268563	6.78329	1.17466e-11	3.01182e-10	1.77506e-10	3.61747e-07
CLIC2	557.85	1.95717	0.288761	6.77783	1.21995e-11	3.12367e-10	1.84098e-10	3.61747e-07
STARD8	282.697	1.32629	0.195846	6.7721	1.26923e-11	3.24543e-10	1.91274e-10	3.61747e-07
LRR1	418.312	-0.83005	0.122595	-6.77069	1.28172e-11	3.27292e-10	1.92894e-10	3.61747e-07
PDCD1	28.8451	2.77278	0.409696	6.7679	1.30669e-11	3.33216e-10	1.96386e-10	3.61747e-07
MYBPC2	14.1755	3.46183	0.511581	6.76693	1.31542e-11	3.34987e-10	1.9743e-10	3.61747e-07
MC2R	3063.83	-3.43791	0.50823	-6.76446	1.33803e-11	3.40283e-10	2.00551e-10	3.61747e-07
ACHE	259.534	-2.75775	0.407886	-6.76107	1.3698e-11	3.47891e-10	2.05035e-10	3.61747e-07
DPYSL3	1905.09	1.69881	0.25128	6.76065	1.37376e-11	3.48426e-10	2.0535e-10	3.61747e-07
ZNF680	686.94	-1.01819	0.150687	-6.757	1.40878e-11	3.56829e-10	2.10302e-10	3.61747e-07
SLC40A1	10566.6	2.39428	0.35448	6.75433	1.43495e-11	3.62885e-10	2.13872e-10	3.61747e-07
ASGR1	155.33	-2.11702	0.313439	-6.75417	1.43656e-11	3.62885e-10	2.13872e-10	3.61747e-07
TRIM9	247.368	2.38042	0.352568	6.75167	1.46154e-11	3.68701e-10	2.17299e-10	3.61747e-07
HLA-DQB2	164.316	2.72452	0.403575	6.75098	1.46848e-11	3.69956e-10	2.18039e-10	3.61747e-07
CFAP46	61.68	-2.88726	0.427948	-6.74675	1.5119e-11	3.80383e-10	2.24185e-10	3.61747e-07
XYLT1	2595.42	-1.49886	0.222196	-6.74566	1.52335e-11	3.82752e-10	2.25581e-10	3.61747e-07
TMC6	328.263	1.36502	0.202447	6.74259	1.55587e-11	3.904e-10	2.30088e-10	3.61747e-07
DAPP1	48.636	2.25214	0.334342	6.73605	1.62753e-11	4.07838e-10	2.40366e-10	3.61747e-07
OSBPL9	2657.98	0.902283	0.13406	6.73044	1.69152e-11	4.22844e-10	2.49209e-10	3.61747e-07
NCF1	41.4384	1.9068	0.283311	6.7304	1.69192e-11	4.22844e-10	2.49209e-10	3.61747e-07
UST	2219.18	-1.24069	0.184373	-6.72925	1.70543e-11	4.25656e-10	2.50867e-10	3.61747e-07
GOLGA7B	1071.8	-2.71765	0.403909	-6.72838	1.71562e-11	4.27632e-10	2.52031e-10	3.61747e-07
TRPV4	59.7777	2.12539	0.31593	6.72742	1.72694e-11	4.29866e-10	2.53348e-10	3.61747e-07
MED27	938.656	-0.851846	0.126626	-6.72724	1.72916e-11	4.29866e-10	2.53348e-10	3.61747e-07
SLFN12L	9.99041	2.17325	0.323179	6.72459	1.76083e-11	4.37161e-10	2.57647e-10	3.61747e-07
DPT	296.918	4.08542	0.607687	6.7229	1.78139e-11	4.41682e-10	2.60312e-10	3.61747e-07
FES	337.205	1.37643	0.204787	6.72127	1.80143e-11	4.46062e-10	2.62893e-10	3.61747e-07
BASP1	1221.13	2.75928	0.410595	6.72019	1.81486e-11	4.48797e-10	2.64505e-10	3.61747e-07
HLA-DRB1	7366.96	2.02223	0.301134	6.71537	1.87589e-11	4.63278e-10	2.7304e-10	3.61747e-07
SLC23A2	10905.9	-1.25123	0.186462	-6.71037	1.94128e-11	4.78759e-10	2.82164e-10	3.61747e-07
RAMP3	626.396	1.76034	0.262338	6.71019	1.94367e-11	4.78759e-10	2.82164e-10	3.61747e-07
ETS1	1389.12	1.23715	0.184811	6.69416	2.1691e-11	5.33588e-10	3.14478e-10	3.61747e-07
ARHGAP17	3237.47	0.823503	0.123067	6.69149	2.20917e-11	5.42734e-10	3.19868e-10	3.61747e-07
HAVCR2	381.914	1.68553	0.252036	6.68767	2.26752e-11	5.56342e-10	3.27889e-10	3.61747e-07
MX2	197.096	1.99833	0.29895	6.68449	2.31728e-11	5.6781e-10	3.34647e-10	3.61747e-07
H2BC15	121.933	-1.53541	0.229777	-6.68215	2.35468e-11	5.76223e-10	3.39605e-10	3.61747e-07
FERMT3	523.67	1.54198	0.230777	6.68168	2.36224e-11	5.76571e-10	3.39811e-10	3.61747e-07
CD8A	152.933	2.59508	0.388386	6.68171	2.36175e-11	5.76571e-10	3.39811e-10	3.61747e-07
ZNF267	326.615	0.759566	0.113794	6.67489	2.47414e-11	6.031e-10	3.55446e-10	3.61747e-07
ENDOU	56.8174	2.30919	0.346073	6.67254	2.51416e-11	6.1206e-10	3.60727e-10	3.61747e-07
CYP3A4	829.592	4.08422	0.612154	6.67189	2.52534e-11	6.13988e-10	3.61863e-10	3.61747e-07
MARCO	123.582	3.64247	0.546287	6.66767	2.59888e-11	6.31052e-10	3.7192e-10	3.61747e-07
PYCARD	754.69	2.62634	0.393931	6.66701	2.61063e-11	6.33086e-10	3.73119e-10	3.61747e-07
ATF5	6259.13	-1.61362	0.242111	-6.66478	2.65054e-11	6.41937e-10	3.78335e-10	3.61747e-07
ETV5	3536.94	-1.50357	0.225612	-6.66437	2.65796e-11	6.42905e-10	3.78906e-10	3.61747e-07
ALPK2	6.88102	3.52314	0.528806	6.66243	2.69328e-11	6.50611e-10	3.83448e-10	3.61747e-07
RNPC3	415.248	1.07745	0.161759	6.66082	2.72297e-11	6.56938e-10	3.87176e-10	3.61747e-07
SIGLEC7	33.2762	2.00697	0.301355	6.65982	2.7416e-11	6.60584e-10	3.89325e-10	3.61747e-07
ZSCAN21	291.644	-0.753073	0.11312	-6.6573	2.78895e-11	6.71134e-10	3.95543e-10	3.61747e-07
CYP1B1	738.384	2.53717	0.381162	6.65642	2.80579e-11	6.74101e-10	3.97291e-10	3.61747e-07
MS4A15	20.3121	-3.50119	0.525998	-6.65628	2.80845e-11	6.74101e-10	3.97291e-10	3.61747e-07
LRP1	6403.21	1.74727	0.262539	6.65528	2.8276e-11	6.77831e-10	3.9949e-10	3.61747e-07
SCAP	10441.2	-1.14633	0.172268	-6.65436	2.84536e-11	6.81218e-10	4.01486e-10	3.61747e-07
SP9	19.8542	-6.978	1.04886	-6.65291	2.87346e-11	6.87072e-10	4.04936e-10	3.61747e-07
LOXL4	487.165	3.41284	0.513033	6.65229	2.88564e-11	6.89107e-10	4.06135e-10	3.61747e-07
GSR	2917.62	1.00883	0.151665	6.65172	2.89694e-11	6.90927e-10	4.07208e-10	3.61747e-07
ZNF217	753.524	1.331	0.200236	6.64716	2.98806e-11	7.11757e-10	4.19485e-10	3.61747e-07
CD52	155.006	1.99303	0.299926	6.64507	3.03065e-11	7.20989e-10	4.24925e-10	3.61747e-07
CLEC9A	20.7947	3.08201	0.464128	6.64042	3.12789e-11	7.43181e-10	4.38005e-10	3.61747e-07
LST1	238.726	2.03207	0.306171	6.63705	3.20025e-11	7.59412e-10	4.47571e-10	3.61747e-07
SLC5A9	32.3427	1.96377	0.295939	6.63571	3.22951e-11	7.64284e-10	4.50442e-10	3.61747e-07
SCIMP	62.9183	1.77527	0.267532	6.63572	3.22931e-11	7.64284e-10	4.50442e-10	3.61747e-07
CCL19	61.5205	4.63961	0.699205	6.63555	3.23298e-11	7.64284e-10	4.50442e-10	3.61747e-07
ZNF536	263.329	-3.094	0.466762	-6.62864	3.38785e-11	7.99889e-10	4.71427e-10	3.61747e-07
CACNA2D4	47.9274	1.66781	0.251627	6.62811	3.40017e-11	8.01792e-10	4.72548e-10	3.61747e-07
ALDH3B1	1586.83	2.19982	0.332224	6.62149	3.5559e-11	8.37463e-10	4.93571e-10	3.61747e-07
EML6	2245.25	-1.96464	0.296819	-6.61898	3.61682e-11	8.50745e-10	5.01399e-10	3.61747e-07
SPSB3	181.9	-1.0513	0.158848	-6.61826	3.63449e-11	8.53833e-10	5.03219e-10	3.61747e-07
NRXN3	149.926	2.81069	0.424704	6.61798	3.64136e-11	8.54378e-10	5.0354e-10	3.61747e-07
ARRB2	913.8	1.1615	0.175555	6.61612	3.68743e-11	8.6411e-10	5.09276e-10	3.61747e-07
SYT8	35.8243	-4.3534	0.658207	-6.61402	3.74014e-11	8.75369e-10	5.15912e-10	3.61747e-07
NCLN	11976.2	-0.854888	0.129274	-6.61301	3.7659e-11	8.80303e-10	5.18819e-10	3.61747e-07
MS4A14	60.0808	2.09155	0.316355	6.61138	3.8075e-11	8.88921e-10	5.23899e-10	3.61747e-07
NCR1	3.95311	3.32981	0.503854	6.60868	3.87771e-11	9.04191e-10	5.32898e-10	3.61747e-07
SNTA1	2304.65	1.13868	0.172331	6.60751	3.90844e-11	9.10225e-10	5.36455e-10	3.61747e-07
CCR4	8.22397	2.47619	0.374913	6.60471	3.98307e-11	9.26458e-10	5.46022e-10	3.61747e-07
GSDMC	7.50116	3.34107	0.505944	6.60365	4.01169e-11	9.31962e-10	5.49266e-10	3.61747e-07
NPTX1	9226.58	-3.10419	0.470431	-6.59861	4.15021e-11	9.62951e-10	5.67529e-10	3.61747e-07
FCRL3	10.7269	2.82734	0.428567	6.59719	4.19029e-11	9.71052e-10	5.72304e-10	3.61747e-07
ARHGAP10	571.598	1.35106	0.204926	6.59294	4.31192e-11	9.9678e-10	5.87467e-10	3.61747e-07
HRH1	144.07	1.86661	0.28312	6.59301	4.30993e-11	9.9678e-10	5.87467e-10	3.61747e-07
PIFO	298.788	2.41649	0.366561	6.59231	4.33024e-11	9.99785e-10	5.89238e-10	3.61747e-07
DDN	53.0363	-2.06854	0.313934	-6.58909	4.42524e-11	1.02047e-09	6.01427e-10	3.61747e-07
GUCY1A2	613.176	1.92803	0.292694	6.58719	4.48226e-11	1.03235e-09	6.0843e-10	3.61747e-07
C5orf38	62.3958	-4.56001	0.69235	-6.58627	4.51007e-11	1.03748e-09	6.11455e-10	3.61747e-07
FGF9	700.991	-2.18184	0.331303	-6.58563	4.52965e-11	1.04071e-09	6.13359e-10	3.61747e-07
MILR1	106.576	1.85124	0.281235	6.58253	4.62502e-11	1.06133e-09	6.25509e-10	3.61747e-07
CTLA4	16.689	3.00952	0.457658	6.57592	4.83548e-11	1.10827e-09	6.53175e-10	3.61747e-07
EVI5L	1783.99	-0.842199	0.128078	-6.57566	4.84386e-11	1.10884e-09	6.53509e-10	3.61747e-07
SLC22A17	1622.61	-2.00888	0.305788	-6.56954	5.04717e-11	1.15397e-09	6.8011e-10	3.61747e-07
NOVA2	476.107	-1.75124	0.266591	-6.56903	5.06431e-11	1.15649e-09	6.81592e-10	3.61747e-07
FPR2	8.07427	2.90095	0.441623	6.56883	5.07133e-11	1.15668e-09	6.81708e-10	3.61747e-07
ABCC6	381.551	2.06582	0.314508	6.56844	5.0846e-11	1.1583e-09	6.82664e-10	3.61747e-07
IRAK2	209.831	1.23619	0.188272	6.56599	5.1688e-11	1.17606e-09	6.93128e-10	3.61747e-07
CXCL9	206.357	2.81164	0.428476	6.56196	5.31035e-11	1.20681e-09	7.11249e-10	3.61747e-07
SALL3	13.8715	-6.4114	0.977225	-6.56082	5.35115e-11	1.21461e-09	7.15848e-10	3.61747e-07
TAFA5	172.812	-3.11104	0.474291	-6.55936	5.40393e-11	1.22511e-09	7.22036e-10	3.61747e-07
GPR68	33.2241	1.77331	0.27042	6.55762	5.46731e-11	1.23649e-09	7.28746e-10	3.61747e-07
TEK	223.693	1.60045	0.244054	6.55777	5.46196e-11	1.23649e-09	7.28746e-10	3.61747e-07
PPP1R3B	2031.9	1.42553	0.217398	6.55721	5.48224e-11	1.23838e-09	7.29857e-10	3.61747e-07
CLEC12A	22.6703	2.38986	0.364486	6.55679	5.49788e-11	1.24042e-09	7.31062e-10	3.61747e-07
RTN4R	710.512	-2.24884	0.34302	-6.55601	5.52656e-11	1.2454e-09	7.33993e-10	3.61747e-07
CSF3R	184.629	1.83108	0.279342	6.55497	5.56519e-11	1.2526e-09	7.38239e-10	3.61747e-07
RORA	4013.92	-1.45217	0.221547	-6.55469	5.57573e-11	1.25347e-09	7.38753e-10	3.61747e-07
GAS2L3	821.546	-1.39996	0.2136	-6.55413	5.59655e-11	1.25665e-09	7.40625e-10	3.61747e-07
SNRK	1019.56	0.701676	0.107062	6.55392	5.60444e-11	1.25692e-09	7.40785e-10	3.61747e-07
PARD3	1639.11	-0.879795	0.134263	-6.55276	5.64824e-11	1.26523e-09	7.45683e-10	3.61747e-07
HAO2	42.0361	-2.69771	0.41175	-6.5518	5.68469e-11	1.27188e-09	7.49603e-10	3.61747e-07
CEP170B	1755.88	-1.54418	0.235708	-6.55123	5.7066e-11	1.27527e-09	7.51597e-10	3.61747e-07
SLC16A7	2884.86	1.67454	0.255858	6.54481	5.95702e-11	1.32965e-09	7.83647e-10	3.61747e-07
EN2	62.3491	-3.31146	0.505986	-6.54457	5.96658e-11	1.3302e-09	7.83974e-10	3.61747e-07
ADGRF4	151.522	3.72428	0.569419	6.54049	6.13171e-11	1.3654e-09	8.04716e-10	3.61747e-07
SLC19A1	632.344	-1.12239	0.171625	-6.53981	6.15984e-11	1.37004e-09	8.07451e-10	3.61747e-07
SGPP2	861.865	2.81398	0.430453	6.53725	6.26614e-11	1.39203e-09	8.20415e-10	3.61747e-07
CERT1	4071.29	-0.98711	0.151017	-6.53644	6.30016e-11	1.39794e-09	8.23894e-10	3.61747e-07
SOX7	161.251	1.64575	0.251789	6.53622	6.30917e-11	1.39828e-09	8.24099e-10	3.61747e-07
SCFD1	2111.07	-0.569001	0.087072	-6.53483	6.36804e-11	1.40801e-09	8.29832e-10	3.61747e-07
CSF2	2.22193	3.70507	0.566968	6.53489	6.36561e-11	1.40801e-09	8.29832e-10	3.61747e-07
CIDEB	63.8207	-2.05896	0.315139	-6.53349	6.42549e-11	1.41904e-09	8.36335e-10	3.61747e-07
FUT7	23.3628	2.64317	0.404636	6.5322	6.48103e-11	1.42963e-09	8.42574e-10	3.61747e-07
FASN	9245.54	-1.75193	0.268208	-6.53199	6.49007e-11	1.42995e-09	8.4276e-10	3.61747e-07
CD180	51.7631	1.9508	0.298846	6.52778	6.67496e-11	1.46896e-09	8.65754e-10	3.61747e-07
KLF17	92.8177	-2.44449	0.374678	-6.52424	6.83459e-11	1.50233e-09	8.85421e-10	3.61747e-07
CD79B	95.703	1.40751	0.215813	6.52192	6.94128e-11	1.52222e-09	8.97144e-10	3.61747e-07
ZDHHC22	40.2614	-3.46963	0.531988	-6.52201	6.93728e-11	1.52222e-09	8.97144e-10	3.61747e-07
ADH1B	1945.61	3.60252	0.552555	6.51975	7.04261e-11	1.54264e-09	9.0918e-10	3.61747e-07
TNFSF4	555.319	-2.6012	0.399092	-6.5178	7.13481e-11	1.55992e-09	9.19361e-10	3.61747e-07
TAPBPL	1318.9	0.961109	0.147461	6.51773	7.13808e-11	1.55992e-09	9.19361e-10	3.61747e-07
CIDEA	34.6859	-3.41171	0.523597	-6.51591	7.22494e-11	1.57707e-09	9.29469e-10	3.61747e-07
TOX4	2649.11	-0.612583	0.0940611	-6.51261	7.38569e-11	1.61029e-09	9.49046e-10	3.61747e-07
FMO4	240.406	1.24587	0.191311	6.5123	7.40076e-11	1.6117e-09	9.49881e-10	3.61747e-07
GPR174	3.51236	3.42373	0.526138	6.50729	7.652e-11	1.66449e-09	9.8099e-10	3.61747e-07
CBX8	658.432	-1.33996	0.205947	-6.50632	7.70117e-11	1.67325e-09	9.86152e-10	3.61747e-07
S100A16	1354.96	2.11231	0.324736	6.5047	7.78484e-11	1.68947e-09	9.95715e-10	3.61747e-07
TM4SF4	32.1892	4.22642	0.64994	6.50278	7.885e-11	1.70924e-09	1.00736e-09	3.61747e-07
DEF6	228.473	1.52238	0.234176	6.501	7.97866e-11	1.72755e-09	1.01816e-09	3.61747e-07
PMAIP1	418.832	2.39706	0.368769	6.50016	8.0233e-11	1.73521e-09	1.02267e-09	3.61747e-07
COQ8A	6809.61	1.50666	0.231895	6.49719	8.18351e-11	1.76783e-09	1.04189e-09	3.61747e-07
SEMA6B	5284.58	-1.9496	0.300129	-6.49587	8.25548e-11	1.78133e-09	1.04985e-09	3.61747e-07
CDHR4	5.04928	2.87404	0.442467	6.49549	8.27646e-11	1.7838e-09	1.05131e-09	3.61747e-07
PALD1	577.601	1.44095	0.221921	6.49309	8.40913e-11	1.81032e-09	1.06694e-09	3.61747e-07
YME1L1	5720.6	-0.782695	0.120678	-6.48582	8.82523e-11	1.89773e-09	1.11845e-09	3.61747e-07
MTRNR2L1	10248.4	4.69859	0.724579	6.48458	8.8978e-11	1.91115e-09	1.12636e-09	3.61747e-07
CLIC3	11.3186	2.1511	0.33175	6.4841	8.92606e-11	1.91503e-09	1.12865e-09	3.61747e-07
STAP2	911.839	1.7091	0.263647	6.48252	9.02006e-11	1.93299e-09	1.13923e-09	3.61747e-07
SH2D2A	53.0234	2.26143	0.349157	6.47683	9.36691e-11	2.00503e-09	1.18169e-09	3.61747e-07
IL12A	8.97469	2.61113	0.403617	6.46931	9.84502e-11	2.10497e-09	1.2406e-09	3.61747e-07
KAZALD1	268.001	-1.85932	0.28747	-6.46785	9.94077e-11	2.12303e-09	1.25124e-09	3.61747e-07
ATP13A1	5107.35	-0.63038	0.0975222	-6.46396	1.01998e-10	2.17587e-09	1.28238e-09	3.61747e-07
TSPAN1	244.007	1.95351	0.302466	6.45861	1.0567e-10	2.25165e-09	1.32704e-09	3.61747e-07
SUGP1	2587.67	-1.04229	0.161486	-6.45439	1.08656e-10	2.31266e-09	1.363e-09	3.61747e-07
SOX1	20.6425	-6.84906	1.0619	-6.44979	1.12006e-10	2.38126e-09	1.40343e-09	3.61747e-07
FAM167B	343.92	1.24076	0.192589	6.44253	1.17494e-10	2.49513e-09	1.47054e-09	3.61747e-07
SLC15A3	518.21	1.551	0.240823	6.44043	1.19133e-10	2.52707e-09	1.48937e-09	3.61747e-07
STARD10	7387.08	1.63964	0.254602	6.44001	1.19467e-10	2.5313e-09	1.49186e-09	3.61747e-07
ULBP3	34.0203	-2.50005	0.388252	-6.43924	1.20069e-10	2.5412e-09	1.49769e-09	3.61747e-07
H3C10	237.544	-2.08818	0.324334	-6.43835	1.20781e-10	2.55338e-09	1.50487e-09	3.61747e-07
HLA-DQA2	287.105	3.07815	0.478266	6.43605	1.22619e-10	2.58933e-09	1.52606e-09	3.61747e-07
CILK1	2722.98	-1.30472	0.202813	-6.43313	1.25002e-10	2.6367e-09	1.55398e-09	3.61747e-07
KITLG	1049.57	1.83882	0.285881	6.43212	1.2584e-10	2.65139e-09	1.56263e-09	3.61747e-07
KLHL14	126.853	-3.72143	0.578928	-6.42814	1.29175e-10	2.7186e-09	1.60224e-09	3.61747e-07
HLA-DMA	2058.28	1.60073	0.24926	6.42194	1.34547e-10	2.8285e-09	1.66702e-09	3.61747e-07
GTPBP4	2461.02	-0.904294	0.140871	-6.41932	1.36881e-10	2.87434e-09	1.69404e-09	3.61747e-07
THEMIS2	654.984	2.08266	0.324556	6.41696	1.39024e-10	2.91609e-09	1.71864e-09	3.61747e-07
SULF2	6736.96	-1.60604	0.250294	-6.41663	1.39324e-10	2.91912e-09	1.72043e-09	3.61747e-07
HTR2B	430.019	2.89322	0.451143	6.41309	1.42597e-10	2.98437e-09	1.75888e-09	3.61747e-07
DPP6	61.7134	3.97809	0.620435	6.41178	1.43831e-10	3.00686e-09	1.77214e-09	3.61747e-07
CD109	260.858	1.94751	0.303759	6.41137	1.44215e-10	3.01152e-09	1.77488e-09	3.61747e-07
KCTD19	17.2735	-2.26664	0.353677	-6.40878	1.46685e-10	3.05971e-09	1.80329e-09	3.61747e-07
JPH3	646.852	-3.90343	0.609186	-6.40762	1.47809e-10	3.07974e-09	1.81509e-09	3.61747e-07
ADCY5	574.991	2.85696	0.445968	6.40621	1.49179e-10	3.10483e-09	1.82988e-09	3.61747e-07
GREB1	762.066	-2.16413	0.338316	-6.39678	1.58688e-10	3.29909e-09	1.94437e-09	3.61747e-07
PLAUR	500.364	1.88631	0.294893	6.39659	1.58883e-10	3.29951e-09	1.94461e-09	3.61747e-07
NLGN4X	60.5484	2.47395	0.38685	6.39512	1.60425e-10	3.32784e-09	1.96131e-09	3.61747e-07
SNAPC4	821.436	-0.943296	0.147554	-6.39291	1.62762e-10	3.37261e-09	1.9877e-09	3.61747e-07
HCN1	24.1207	5.15115	0.805814	6.39248	1.63216e-10	3.37828e-09	1.99104e-09	3.61747e-07
EFNA4	954.692	-1.29319	0.202382	-6.38986	1.66041e-10	3.43298e-09	2.02328e-09	3.61747e-07
CADM1	2479.52	-1.76707	0.276558	-6.38949	1.66436e-10	3.43736e-09	2.02586e-09	3.61747e-07
HLA-DPB1	4328.57	1.88966	0.296034	6.38325	1.73371e-10	3.57667e-09	2.10796e-09	3.61747e-07
PROK1	461.421	4.78184	0.74942	6.38072	1.76256e-10	3.63219e-09	2.14068e-09	3.61747e-07
PLD4	187.511	2.42676	0.380618	6.37584	1.81964e-10	3.74571e-09	2.20759e-09	3.61747e-07
TNFAIP8L3	689.667	2.19858	0.344959	6.37346	1.84813e-10	3.8002e-09	2.2397e-09	3.61747e-07
C9	16.7947	-2.82127	0.442683	-6.37312	1.85221e-10	3.80442e-09	2.24219e-09	3.61747e-07
WBP1L	4907.46	-0.928503	0.145836	-6.36678	1.93043e-10	3.96075e-09	2.33433e-09	3.61747e-07
SPIB	5.05561	2.34468	0.368292	6.36636	1.9357e-10	3.96723e-09	2.33815e-09	3.61747e-07
TNFAIP3	2405.67	-1.59697	0.250934	-6.36411	1.96421e-10	4.02129e-09	2.37001e-09	3.61747e-07
GMFG	460.156	1.31708	0.207033	6.36168	1.99562e-10	4.08114e-09	2.40528e-09	3.61747e-07
HSDL1	3001.95	-1.00446	0.157956	-6.35912	2.02914e-10	4.14519e-09	2.44303e-09	3.61747e-07
SLIT1	50.9091	-2.33694	0.367694	-6.35565	2.07542e-10	4.23511e-09	2.49603e-09	3.61747e-07
GNGT2	30.311	1.44585	0.227628	6.35181	2.12798e-10	4.33766e-09	2.55647e-09	3.61747e-07
PPARGC1A	594.446	2.67112	0.420592	6.35086	2.1412e-10	4.35988e-09	2.56956e-09	3.61747e-07
GAL3ST4	228.463	1.51966	0.239324	6.34982	2.1557e-10	4.38465e-09	2.58416e-09	3.61747e-07
NOP9	1464.23	-0.738474	0.116455	-6.34129	2.27846e-10	4.62934e-09	2.72837e-09	3.61747e-07
PON2	5150.01	-1.02274	0.161333	-6.33928	2.30848e-10	4.6802e-09	2.75835e-09	3.61747e-07
CYP19A1	552.228	-3.36722	0.531164	-6.33931	2.30789e-10	4.6802e-09	2.75835e-09	3.61747e-07
RASAL3	182.185	1.28	0.202095	6.33364	2.3944e-10	4.84918e-09	2.85794e-09	3.61747e-07
CPA3	260.52	2.87718	0.454318	6.33296	2.40503e-10	4.86546e-09	2.86753e-09	3.61747e-07
CXCL11	28.7841	2.38656	0.376962	6.33103	2.43525e-10	4.92131e-09	2.90045e-09	3.61747e-07
FAM207A	837.374	-1.18032	0.186484	-6.32934	2.46204e-10	4.9701e-09	2.9292e-09	3.61747e-07
TTC39A	592.231	2.17198	0.343264	6.32742	2.49288e-10	5.02696e-09	2.96271e-09	3.61747e-07
VENTX	36.3115	1.90292	0.300801	6.32617	2.51317e-10	5.06244e-09	2.98363e-09	3.61747e-07
SLC26A10	18.6128	-2.40534	0.380385	-6.32345	2.55787e-10	5.14695e-09	3.03343e-09	3.61747e-07
PIP4K2A	1362.65	0.935695	0.147985	6.32291	2.56678e-10	5.15937e-09	3.04075e-09	3.61747e-07
FYB1	248.464	2.06331	0.326372	6.32195	2.58285e-10	5.18612e-09	3.05652e-09	3.61747e-07
DPF1	50.6062	-2.0585	0.325735	-6.31953	2.62358e-10	5.26227e-09	3.1014e-09	3.61747e-07
WDR20	1024.26	-0.682389	0.107992	-6.31889	2.63445e-10	5.27845e-09	3.11093e-09	3.61747e-07
ARHGAP15	176.981	1.29923	0.205627	6.31842	2.64254e-10	5.28902e-09	3.11716e-09	3.61747e-07
CYTL1	44.7021	2.3231	0.367697	6.31796	2.6503e-10	5.29892e-09	3.123e-09	3.61747e-07
PLEKHO2	2644.43	0.950938	0.150518	6.31775	2.65401e-10	5.30068e-09	3.12404e-09	3.61747e-07
A2M	18867.4	1.29059	0.204422	6.31337	2.73029e-10	5.44724e-09	3.21042e-09	3.61747e-07
GDF2	4.54851	-5.04393	0.799411	-6.30956	2.7983e-10	5.57701e-09	3.2869e-09	3.61747e-07
DRAM1	972.354	1.11547	0.1768	6.30923	2.80433e-10	5.58312e-09	3.2905e-09	3.61747e-07
SMCO3	24.1406	1.94066	0.307797	6.30501	2.88178e-10	5.73124e-09	3.37779e-09	3.61747e-07
PDK2	1883.68	1.33422	0.211789	6.29977	2.98084e-10	5.92198e-09	3.49021e-09	3.61747e-07
ZNF385B	397.615	2.61267	0.414885	6.29733	3.02812e-10	6.00956e-09	3.54182e-09	3.61747e-07
CCN3	23213.3	-3.11513	0.494927	-6.29412	3.09154e-10	6.12894e-09	3.61218e-09	3.61747e-07
APOBEC2	12.3756	-2.67365	0.424907	-6.29231	3.12772e-10	6.19414e-09	3.65061e-09	3.61747e-07
RBPMS2	290.9	-1.7534	0.278701	-6.29134	3.14729e-10	6.22634e-09	3.66959e-09	3.61747e-07
ALDH3B2	23.7483	4.3556	0.692436	6.29026	3.16931e-10	6.26331e-09	3.69137e-09	3.61747e-07
PCDHGC3	460	1.82736	0.290534	6.28967	3.18134e-10	6.28048e-09	3.70149e-09	3.61747e-07
SCEL	44.1807	-3.96211	0.629973	-6.28934	3.18816e-10	6.28734e-09	3.70554e-09	3.61747e-07
CLEC2D	174.421	1.36621	0.217261	6.28834	3.2087e-10	6.32121e-09	3.7255e-09	3.61747e-07
FAM83E	3.80745	-2.80779	0.446519	-6.28817	3.21236e-10	6.32179e-09	3.72584e-09	3.61747e-07
SLC4A1	24.2556	-3.19617	0.50879	-6.28189	3.34476e-10	6.5741e-09	3.87454e-09	3.61747e-07
HHIPL2	84.8696	-3.48853	0.555342	-6.28176	3.34757e-10	6.5741e-09	3.87454e-09	3.61747e-07
FOXN4	17.2303	-2.87312	0.457721	-6.27701	3.45148e-10	6.7711e-09	3.99065e-09	3.61747e-07
ILF3	10905.3	-0.530196	0.0845105	-6.27373	3.52505e-10	6.90822e-09	4.07146e-09	3.61747e-07
PROS1	794.1	1.3639	0.217655	6.26631	3.69709e-10	7.23782e-09	4.26572e-09	3.61747e-07
ADAM11	84.2578	-1.78502	0.284941	-6.26454	3.73932e-10	7.31287e-09	4.30995e-09	3.61747e-07
NUTM1	4.81107	-4.45201	0.71072	-6.26408	3.75031e-10	7.32153e-09	4.31505e-09	3.61747e-07
STYXL2	10.0702	3.04204	0.485636	6.26403	3.75153e-10	7.32153e-09	4.31505e-09	3.61747e-07
GRB7	65.1784	3.51803	0.561838	6.26164	3.80958e-10	7.4271e-09	4.37727e-09	3.61747e-07
KLRF1	10.6856	1.93483	0.309114	6.25926	3.868e-10	7.53318e-09	4.43979e-09	3.61747e-07
SOWAHA	44.9252	-3.28777	0.525639	-6.25481	3.98008e-10	7.74345e-09	4.56372e-09	3.61747e-07
SLC29A4	227.862	-2.29017	0.366189	-6.25406	3.99927e-10	7.77273e-09	4.58097e-09	3.61747e-07
MEFV	18.7184	2.14627	0.343594	6.24652	4.19701e-10	8.14862e-09	4.80251e-09	3.61747e-07
PAX9	36.6388	2.93104	0.46933	6.24517	4.23351e-10	8.21099e-09	4.83927e-09	3.61747e-07
KIAA0040	634.403	1.52713	0.244587	6.24372	4.27277e-10	8.2786e-09	4.87912e-09	3.61747e-07
CDH2	2346.61	-3.06304	0.490811	-6.24077	4.35426e-10	8.4278e-09	4.96705e-09	3.61747e-07
PYGB	4809.31	0.784358	0.125712	6.23933	4.39447e-10	8.49688e-09	5.00776e-09	3.61747e-07
EFNB1	2694.14	-1.181	0.189317	-6.2382	4.42644e-10	8.54989e-09	5.03901e-09	3.61747e-07
FAM110D	66.2862	1.20779	0.193862	6.23015	4.65983e-10	8.99146e-09	5.29925e-09	3.61747e-07
TTYH1	59.9294	-2.12253	0.34071	-6.22973	4.67241e-10	9.00649e-09	5.30811e-09	3.61747e-07
COLGALT2	577.535	-2.78228	0.446835	-6.22663	4.76562e-10	9.17675e-09	5.40846e-09	3.61747e-07
CKS2	2729.97	-1.22072	0.196062	-6.22623	4.77795e-10	9.19107e-09	5.41689e-09	3.61747e-07
DNMT3A	1893.59	-1.33402	0.214316	-6.22454	4.82973e-10	9.28117e-09	5.47e-09	3.61747e-07
KIRREL3	22.4975	-2.00627	0.322333	-6.22422	4.83962e-10	9.29068e-09	5.4756e-09	3.61747e-07
ADAMTSL4	256.827	1.76618	0.28377	6.22399	4.84671e-10	9.29481e-09	5.47804e-09	3.61747e-07
TBX3	28845.6	-1.31567	0.211421	-6.22301	4.87701e-10	9.34337e-09	5.50665e-09	3.61747e-07
FGFBP3	256.983	-1.62678	0.261515	-6.22059	4.95276e-10	9.47884e-09	5.58649e-09	3.61747e-07
RALGDS	7447.5	1.23697	0.198996	6.21605	5.09831e-10	9.74747e-09	5.74482e-09	3.61747e-07
DMAP1	4307.8	-0.932654	0.150071	-6.21474	5.14108e-10	9.81926e-09	5.78713e-09	3.61747e-07
MTMR11	2128.97	-1.11762	0.179848	-6.21423	5.15768e-10	9.84097e-09	5.79992e-09	3.61747e-07
PPP2R5C	4390.93	-0.793309	0.127731	-6.21078	5.27213e-10	1.00491e-08	5.9226e-09	3.61747e-07
GATM	1374.89	1.93364	0.311363	6.21026	5.2896e-10	1.00722e-08	5.93621e-09	3.61747e-07
EP400	3384.68	-0.761529	0.122671	-6.20788	5.37048e-10	1.02159e-08	6.02088e-09	3.61747e-07
ERBB3	105.519	2.50609	0.403806	6.20617	5.42904e-10	1.03168e-08	6.08037e-09	3.61747e-07
ITM2A	219.162	2.08497	0.336002	6.20523	5.46153e-10	1.03472e-08	6.09826e-09	3.61747e-07
ABCA3	4977.5	1.74125	0.280603	6.20539	5.4561e-10	1.03472e-08	6.09826e-09	3.61747e-07
GJA4	571.965	1.38859	0.223766	6.20554	5.45086e-10	1.03472e-08	6.09826e-09	3.61747e-07
FFAR4	14.309	2.05245	0.330894	6.20275	5.54854e-10	1.05014e-08	6.18917e-09	3.61747e-07
HOXC9	204.508	-1.8624	0.300287	-6.20205	5.57319e-10	1.05375e-08	6.21042e-09	3.61747e-07
PLA2G2D	5.2466	3.14969	0.507906	6.20133	5.59885e-10	1.05753e-08	6.23274e-09	3.61747e-07
GJB1	12.2133	4.82156	0.777528	6.20114	5.60556e-10	1.05774e-08	6.23395e-09	3.61747e-07
MYCL	24.3302	1.84441	0.297649	6.19662	5.76902e-10	1.08749e-08	6.4093e-09	3.61747e-07
ALKAL2	3400.66	-2.01207	0.32472	-6.19631	5.78015e-10	1.0885e-08	6.41523e-09	3.61747e-07
ANGPTL2	3917.64	1.63066	0.263175	6.19612	5.78704e-10	1.0887e-08	6.41645e-09	3.61747e-07
NAA35	829.9	-0.742343	0.119987	-6.18685	6.13773e-10	1.15352e-08	6.79847e-09	3.61747e-07
UGT1A7	151.271	4.61496	0.746573	6.18153	6.34843e-10	1.19193e-08	7.02483e-09	3.61747e-07
TESK1	3175.76	-1.15421	0.186886	-6.17602	6.57387e-10	1.23303e-08	7.26703e-09	3.61747e-07
MSLN	22.1679	2.05223	0.332376	6.17444	6.63969e-10	1.24328e-08	7.32745e-09	3.61747e-07
SHISAL1	194.613	-3.16582	0.512734	-6.17439	6.64176e-10	1.24328e-08	7.32745e-09	3.61747e-07
TLR4	372.266	1.48889	0.241181	6.17333	6.68683e-10	1.25047e-08	7.36983e-09	3.61747e-07
IRF6	1277.02	2.43383	0.394346	6.17182	6.75084e-10	1.26119e-08	7.43299e-09	3.61747e-07
PTPRF	3628.65	-1.58208	0.256387	-6.17068	6.79965e-10	1.26904e-08	7.4793e-09	3.61747e-07
STAT5A	1883.7	1.25905	0.204066	6.16982	6.83665e-10	1.27468e-08	7.51253e-09	3.61747e-07
IRAK4	755.171	0.769443	0.124796	6.16563	7.0205e-10	1.30766e-08	7.70691e-09	3.61747e-07
KLC2	1445.81	-0.790965	0.128296	-6.16514	7.04211e-10	1.30909e-08	7.71535e-09	3.61747e-07
MIEF2	1597.41	0.944138	0.153139	6.16524	7.0377e-10	1.30909e-08	7.71535e-09	3.61747e-07
RASSF6	15.9573	5.24749	0.851302	6.16408	7.08955e-10	1.31661e-08	7.75964e-09	3.61747e-07
MGAT5B	75.8167	-2.38594	0.387348	-6.15968	7.28909e-10	1.35104e-08	7.96255e-09	3.61747e-07
CD300E	21.7282	1.99725	0.324246	6.15968	7.28931e-10	1.35104e-08	7.96255e-09	3.61747e-07
COPS7B	1592.43	-0.708065	0.114968	-6.15882	7.32887e-10	1.35608e-08	7.99228e-09	3.61747e-07
STARD5	52.5053	1.32127	0.214535	6.15878	7.33096e-10	1.35608e-08	7.99228e-09	3.61747e-07
FBN2	2130.07	-2.23102	0.362272	-6.15841	7.34766e-10	1.35784e-08	8.00261e-09	3.61747e-07
BFSP1	141.042	1.66883	0.270998	6.1581	7.36209e-10	1.35917e-08	8.01045e-09	3.61747e-07
GUCY1A1	226.862	1.69047	0.274527	6.15773	7.3793e-10	1.36101e-08	8.0213e-09	3.61747e-07
KLHL18	804.638	-0.649348	0.105474	-6.15646	7.43881e-10	1.37064e-08	8.07806e-09	3.61747e-07
DLX1	49.9112	-3.2936	0.53513	-6.15476	7.51897e-10	1.38405e-08	8.1571e-09	3.61747e-07
C17orf99	4.90446	3.96442	0.644201	6.15402	7.55433e-10	1.3892e-08	8.18745e-09	3.61747e-07
POLRMT	2950.87	-0.652829	0.106099	-6.15301	7.60257e-10	1.3967e-08	8.23167e-09	3.61747e-07
ACAP1	332.939	1.32094	0.214688	6.15284	7.61086e-10	1.39686e-08	8.23261e-09	3.61747e-07
NPAS2	1184.42	-1.63473	0.265699	-6.15257	7.6236e-10	1.39783e-08	8.23834e-09	3.61747e-07
SLC41A1	2848.49	-1.12303	0.182555	-6.15171	7.66516e-10	1.40408e-08	8.27518e-09	3.61747e-07
FLVCR1	634.377	-1.18469	0.192603	-6.15096	7.70151e-10	1.40937e-08	8.30632e-09	3.61747e-07
WDR18	2770.39	-1.11861	0.181871	-6.15057	7.72034e-10	1.41144e-08	8.31854e-09	3.61747e-07
RALGAPA2	655.483	0.986265	0.160431	6.1476	7.86634e-10	1.43673e-08	8.46761e-09	3.61747e-07
ZDHHC20	1720.55	-0.836157	0.136055	-6.14572	7.96015e-10	1.45246e-08	8.56027e-09	3.61747e-07
LRRC36	35.1481	-1.92069	0.312615	-6.14396	8.04881e-10	1.46721e-08	8.64722e-09	3.61747e-07
PACS2	3544.34	-0.819161	0.133365	-6.14224	8.13674e-10	1.4818e-08	8.73322e-09	3.61747e-07
LRRC23	570.358	0.863106	0.140539	6.14142	8.17882e-10	1.48726e-08	8.76538e-09	3.61747e-07
SNX10	1974.07	-1.22156	0.198908	-6.14135	8.18254e-10	1.48726e-08	8.76538e-09	3.61747e-07
USP53	932.746	1.70029	0.276892	6.14063	8.21973e-10	1.49174e-08	8.79176e-09	3.61747e-07
KCNC2	73.1861	-6.21562	1.01222	-6.14056	8.22304e-10	1.49174e-08	8.79176e-09	3.61747e-07
MERTK	3760.19	-1.82976	0.298059	-6.13892	8.30869e-10	1.50582e-08	8.87477e-09	3.61747e-07
SLFN11	300.072	1.33155	0.217084	6.13377	8.58188e-10	1.55383e-08	9.15774e-09	3.61747e-07
KRT8	3952.51	3.10891	0.50691	6.13307	8.62017e-10	1.55926e-08	9.18975e-09	3.61747e-07
LGALS9	761.406	1.36563	0.222675	6.13284	8.63216e-10	1.55993e-08	9.19368e-09	3.61747e-07
CDHR5	293.909	-3.83672	0.625752	-6.13138	8.71199e-10	1.57285e-08	9.2698e-09	3.61747e-07
CYP27A1	5408.36	2.02134	0.329834	6.12835	8.87929e-10	1.60151e-08	9.43874e-09	3.61747e-07
CH25H	129.672	2.22812	0.363784	6.12485	9.07702e-10	1.6356e-08	9.63968e-09	3.61747e-07
DOCK2	343.331	1.6168	0.264004	6.12415	9.11696e-10	1.64123e-08	9.67282e-09	3.61747e-07
KDR	1740.49	1.35281	0.220914	6.12369	9.1431e-10	1.64436e-08	9.69127e-09	3.61747e-07
S100A4	670.512	1.70501	0.278459	6.123	9.18283e-10	1.64992e-08	9.72408e-09	3.61747e-07
VAV3	172.277	1.96138	0.320442	6.12086	9.30738e-10	1.66911e-08	9.83716e-09	3.61747e-07
RTL10	599.194	-0.968161	0.158172	-6.12093	9.30279e-10	1.66911e-08	9.83716e-09	3.61747e-07
NLRC3	119.357	1.0155	0.166133	6.11259	9.80256e-10	1.75624e-08	1.03506e-08	3.61747e-07
CXCL13	29.6187	3.26312	0.53407	6.10991	9.96853e-10	1.78427e-08	1.05159e-08	3.61747e-07
SLC39A9	3968.64	-0.605405	0.0991551	-6.10564	1.02389e-09	1.83091e-08	1.07908e-08	3.61747e-07
EPHA4	573.132	-1.84728	0.302654	-6.10361	1.03696e-09	1.85253e-08	1.09182e-08	3.61747e-07
SOX9	780.447	2.93158	0.480396	6.10243	1.04468e-09	1.86455e-08	1.0989e-08	3.61747e-07
TRPA1	9.04303	3.20055	0.524647	6.10039	1.05812e-09	1.88675e-08	1.11199e-08	3.61747e-07
SMARCD1	3608.16	-0.726536	0.119124	-6.099	1.06734e-09	1.90139e-08	1.12061e-08	3.61747e-07
NOSTRIN	1237.61	-1.70111	0.278935	-6.09862	1.0699e-09	1.90415e-08	1.12224e-08	3.61747e-07
MSR1	476.242	1.58474	0.259869	6.09823	1.07252e-09	1.90699e-08	1.12391e-08	3.61747e-07
UBASH3B	97.9548	1.40092	0.229753	6.09752	1.07725e-09	1.9136e-08	1.12781e-08	3.61747e-07
FAM219B	618.446	-0.935881	0.153542	-6.09529	1.09237e-09	1.93862e-08	1.14256e-08	3.61747e-07
IRF4	18.695	2.69571	0.442552	6.09129	1.12008e-09	1.98592e-08	1.17043e-08	3.61747e-07
CCDC107	564.42	-1.04168	0.171114	-6.08764	1.14589e-09	2.02663e-08	1.19443e-08	3.61747e-07
VSNL1	548.653	-4.08644	0.671269	-6.08764	1.14588e-09	2.02663e-08	1.19443e-08	3.61747e-07
DPEP2	50.3886	1.60713	0.264001	6.08758	1.14628e-09	2.02663e-08	1.19443e-08	3.61747e-07
KCNG3	85.0908	-2.87416	0.472427	-6.08382	1.17355e-09	2.0729e-08	1.2217e-08	3.61747e-07
GTF3C4	1270.79	-0.806403	0.132599	-6.08149	1.19068e-09	2.10061e-08	1.23803e-08	3.61747e-07
GPR162	208.713	-2.3234	0.382052	-6.08139	1.19147e-09	2.10061e-08	1.23803e-08	3.61747e-07
PCDH17	396.796	1.82732	0.300598	6.07894	1.2098e-09	2.13093e-08	1.25589e-08	3.61747e-07
POU2AF1	25.5167	3.36167	0.553194	6.07685	1.2257e-09	2.15691e-08	1.27121e-08	3.61747e-07
GLS	5781.53	1.3123	0.215986	6.07589	1.23305e-09	2.16781e-08	1.27763e-08	3.61747e-07
CD1B	2.46767	4.53353	0.746353	6.07425	1.24572e-09	2.18804e-08	1.28955e-08	3.61747e-07
TP53AIP1	17.8067	-2.6624	0.438405	-6.07292	1.25605e-09	2.20412e-08	1.29903e-08	3.61747e-07
C1orf105	41.814	2.96798	0.488792	6.07207	1.26272e-09	2.21376e-08	1.30471e-08	3.61747e-07
FRMD4B	237.288	1.2049	0.198478	6.0707	1.27354e-09	2.22965e-08	1.31408e-08	3.61747e-07
CDC42EP2	328.108	1.45521	0.239713	6.07062	1.27416e-09	2.22965e-08	1.31408e-08	3.61747e-07
F12	49.0784	-2.79474	0.460625	-6.06727	1.30099e-09	2.2745e-08	1.34051e-08	3.61747e-07
AL136295.5	22.5419	-1.65508	0.272895	-6.06489	1.32044e-09	2.30635e-08	1.35928e-08	3.61747e-07
SP8	5.52814	-4.42734	0.730047	-6.06445	1.32406e-09	2.31052e-08	1.36174e-08	3.61747e-07
C3AR1	356.146	1.82947	0.3017	6.06385	1.329e-09	2.317e-08	1.36556e-08	3.61747e-07
LYN	748.618	1.29382	0.213491	6.06028	1.35882e-09	2.36679e-08	1.3949e-08	3.61747e-07
RHOU	4208.23	-1.72811	0.285184	-6.05964	1.36425e-09	2.37405e-08	1.39918e-08	3.61747e-07
LILRA1	20.9211	1.86273	0.307417	6.0593	1.36714e-09	2.37688e-08	1.40085e-08	3.61747e-07
ATP6V1B1	72.6624	-2.41211	0.39822	-6.05721	1.38499e-09	2.40569e-08	1.41783e-08	3.61747e-07
EGLN1	4189.27	-0.805355	0.133036	-6.05367	1.41587e-09	2.45705e-08	1.4481e-08	3.61747e-07
REXO1	5432.88	-0.869032	0.143724	-6.04651	1.48014e-09	2.56621e-08	1.51243e-08	3.61747e-07
SLC41A3	8101.06	1.19882	0.198322	6.04484	1.49555e-09	2.59054e-08	1.52678e-08	3.61747e-07
SNAPC2	1669.21	-1.0077	0.166732	-6.04384	1.50491e-09	2.60435e-08	1.53491e-08	3.61747e-07
PTPRB	722.581	1.22203	0.202213	6.04328	1.51011e-09	2.61095e-08	1.5388e-08	3.61747e-07
TOMM40	4983.87	-0.816002	0.135141	-6.03817	1.55875e-09	2.69258e-08	1.58691e-08	3.61747e-07
IRF5	251.465	1.49957	0.248384	6.03733	1.5669e-09	2.70415e-08	1.59373e-08	3.61747e-07
MEST	2267.36	-2.0272	0.335895	-6.03524	1.58731e-09	2.73688e-08	1.61302e-08	3.61747e-07
CCDC200	12.5231	1.84616	0.30592	6.03477	1.59192e-09	2.7423e-08	1.61622e-08	3.61747e-07
PEAK3	16.3796	1.66894	0.276641	6.03288	1.61065e-09	2.77203e-08	1.63373e-08	3.61747e-07
SMOC2	233.176	1.48358	0.245947	6.03209	1.6185e-09	2.78299e-08	1.6402e-08	3.61747e-07
MBNL1	5094.46	0.777618	0.128973	6.02929	1.64682e-09	2.82652e-08	1.66585e-08	3.61747e-07
PDE1C	53.9391	1.72557	0.286192	6.0294	1.64574e-09	2.82652e-08	1.66585e-08	3.61747e-07
TMEM121	87.3631	-2.34661	0.38931	-6.02762	1.66388e-09	2.85319e-08	1.68157e-08	3.61747e-07
CRIP3	76.6605	2.80382	0.465191	6.02725	1.66771e-09	2.85715e-08	1.6839e-08	3.61747e-07
LIPC	8.32868	2.45152	0.406886	6.02507	1.69039e-09	2.89337e-08	1.70525e-08	3.61747e-07
LPXN	317.879	0.769118	0.127715	6.02215	1.72118e-09	2.94339e-08	1.73473e-08	3.61747e-07
TIFAB	2.73038	2.75596	0.457668	6.02174	1.7255e-09	2.9481e-08	1.73751e-08	3.61747e-07
PRPF4	1400.36	-0.66548	0.110526	-6.02104	1.73296e-09	2.95815e-08	1.74343e-08	3.61747e-07
GATA5	94.4659	-3.8237	0.635327	-6.01846	1.76079e-09	3.00293e-08	1.76982e-08	3.61747e-07
KRT15	13.712	4.43101	0.736487	6.01641	1.78331e-09	3.03858e-08	1.79083e-08	3.61747e-07
ETV4	504.589	-2.58256	0.429416	-6.01413	1.80856e-09	3.07881e-08	1.81454e-08	3.61747e-07
NOS3	551.241	1.29366	0.215136	6.01323	1.8186e-09	3.0931e-08	1.82297e-08	3.61747e-07
STAC	442.255	2.34497	0.390033	6.01225	1.82969e-09	3.10914e-08	1.83242e-08	3.61747e-07
CXCL2	134.214	2.63311	0.438117	6.01005	1.85462e-09	3.14866e-08	1.85571e-08	3.61747e-07
RGS2	7684.21	1.87275	0.311645	6.00926	1.86373e-09	3.15843e-08	1.86147e-08	3.61747e-07
VGF	4747.76	-3.575	0.594913	-6.00928	1.86354e-09	3.15843e-08	1.86147e-08	3.61747e-07
MAPK1IP1L	3811.32	-0.52929	0.0880868	-6.00873	1.86981e-09	3.16587e-08	1.86586e-08	3.61747e-07
PRODH	12.8208	3.219	0.535806	6.00778	1.88084e-09	3.17881e-08	1.87348e-08	3.61747e-07
DDX31	623.586	-0.711744	0.118469	-6.00784	1.88008e-09	3.17881e-08	1.87348e-08	3.61747e-07
STX18	1860.76	-0.731836	0.121882	-6.00448	1.91942e-09	3.24111e-08	1.9102e-08	3.61747e-07
TFPI	1555.87	1.79796	0.299504	6.00313	1.93544e-09	3.26524e-08	1.92442e-08	3.61747e-07
PSMB5	5172.55	-0.722393	0.120378	-6.00102	1.96079e-09	3.30502e-08	1.94787e-08	3.61747e-07
TMEM151B	13.5904	-2.93642	0.489407	-5.99996	1.97362e-09	3.32368e-08	1.95886e-08	3.61747e-07
COL12A1	1014.45	1.77806	0.296388	5.99909	1.98427e-09	3.33862e-08	1.96767e-08	3.61747e-07
RFLNA	52.8297	1.97185	0.328994	5.99357	2.05281e-09	3.45085e-08	2.03381e-08	3.61747e-07
VWA5B1	4.80241	3.42632	0.571847	5.99168	2.07685e-09	3.48814e-08	2.05579e-08	3.61747e-07
PRSS56	29.2481	-4.00486	0.668434	-5.99141	2.08032e-09	3.49085e-08	2.05738e-08	3.61747e-07
TUBB8B	34.0753	-2.96568	0.495212	-5.9887	2.11521e-09	3.54623e-08	2.09002e-08	3.61747e-07
PTGS1	185.253	1.76724	0.295126	5.9881	2.12309e-09	3.5536e-08	2.09437e-08	3.61747e-07
FOXL2	305.62	-3.14156	0.524637	-5.98808	2.12339e-09	3.5536e-08	2.09437e-08	3.61747e-07
PRDM12	22.2877	-1.89143	0.316027	-5.98502	2.16358e-09	3.61764e-08	2.13211e-08	3.61747e-07
APOBEC3D	272.748	1.80455	0.301572	5.98381	2.17982e-09	3.64155e-08	2.1462e-08	3.61747e-07
FCRL2	4.1033	4.44985	0.743754	5.98296	2.19122e-09	3.65735e-08	2.15551e-08	3.61747e-07
TLX1	3.95627	-4.44408	0.742857	-5.98241	2.19854e-09	3.66632e-08	2.1608e-08	3.61747e-07
XPNPEP2	34.3843	3.19188	0.533638	5.98135	2.21291e-09	3.687e-08	2.17299e-08	3.61747e-07
SIGLEC6	4.70829	5.5933	0.935274	5.98039	2.2261e-09	3.70468e-08	2.18341e-08	3.61747e-07
WNK2	476.227	-2.43669	0.407453	-5.98029	2.22746e-09	3.70468e-08	2.18341e-08	3.61747e-07
GEM	562.576	1.57533	0.263497	5.97855	2.25127e-09	3.73985e-08	2.20414e-08	3.61747e-07
FUT2	134.094	-1.74014	0.291069	-5.97846	2.25259e-09	3.73985e-08	2.20414e-08	3.61747e-07
APPL2	2311.47	0.954399	0.159731	5.97504	2.30039e-09	3.81585e-08	2.24893e-08	3.61747e-07
TIMD4	10.3708	3.01259	0.504456	5.97196	2.34425e-09	3.88516e-08	2.28978e-08	3.61747e-07
TMEM65	1037.59	1.08529	0.181737	5.97177	2.34688e-09	3.88611e-08	2.29034e-08	3.61747e-07
SLC4A3	1868.33	-2.1098	0.353528	-5.96786	2.40392e-09	3.97623e-08	2.34345e-08	3.61747e-07
NR5A1	26008.6	-1.40057	0.23469	-5.96775	2.40554e-09	3.97623e-08	2.34345e-08	3.61747e-07
RORB	629.565	-3.06713	0.514059	-5.96649	2.42413e-09	4.00343e-08	2.35948e-08	3.61747e-07
SP5	114.598	-1.96227	0.328977	-5.96477	2.44977e-09	4.04222e-08	2.38234e-08	3.61747e-07
ZBTB5	658.596	-0.877314	0.147087	-5.96458	2.45257e-09	4.0433e-08	2.38298e-08	3.61747e-07
JARID2	733.014	-0.812286	0.136233	-5.9625	2.48415e-09	4.09177e-08	2.41154e-08	3.61747e-07
MOAP1	1578.96	-1.00186	0.168092	-5.96018	2.51962e-09	4.14656e-08	2.44384e-08	3.61747e-07
VAV1	178.672	1.71994	0.288685	5.95786	2.55566e-09	4.19852e-08	2.47446e-08	3.61747e-07
CTNND2	100.32	-3.79623	0.637172	-5.95793	2.55455e-09	4.19852e-08	2.47446e-08	3.61747e-07
CD300LF	28.6523	1.69503	0.284551	5.95687	2.5712e-09	4.22036e-08	2.48733e-08	3.61747e-07
HYAL3	219.848	-1.43815	0.241469	-5.95583	2.58758e-09	4.24353e-08	2.50099e-08	3.61747e-07
CRYBG1	313.928	1.56476	0.262908	5.95172	2.65339e-09	4.34768e-08	2.56237e-08	3.61747e-07
PPFIA3	1806.18	-1.22783	0.206387	-5.94918	2.69483e-09	4.41173e-08	2.60012e-08	3.61747e-07
NRXN2	962.401	-2.58173	0.434187	-5.94612	2.74576e-09	4.4912e-08	2.64695e-08	3.61747e-07
SLC16A10	825.68	1.68872	0.284057	5.94499	2.76475e-09	4.51832e-08	2.66294e-08	3.61747e-07
GLYATL1	12.8818	2.73891	0.46082	5.94356	2.78899e-09	4.55398e-08	2.68396e-08	3.61747e-07
EIF2S1	2951.72	-0.809517	0.136233	-5.94214	2.8132e-09	4.58952e-08	2.7049e-08	3.61747e-07
TINAGL1	1481.33	1.33081	0.223982	5.94158	2.82294e-09	4.60142e-08	2.71192e-08	3.61747e-07
KRI1	1858.17	-0.604879	0.10183	-5.9401	2.8484e-09	4.63889e-08	2.734e-08	3.61747e-07
PLEKHF2	583.293	0.753549	0.126897	5.93827	2.88037e-09	4.68689e-08	2.76229e-08	3.61747e-07
UBE2S	1665.6	-1.29261	0.217714	-5.9372	2.89929e-09	4.70954e-08	2.77564e-08	3.61747e-07
PNMA6A	318.659	-2.1734	0.36606	-5.93727	2.898e-09	4.70954e-08	2.77564e-08	3.61747e-07
RDH12	97.9747	-2.59307	0.437339	-5.92921	3.04397e-09	4.94027e-08	2.91162e-08	3.61747e-07
P2RY12	75.6621	2.73856	0.461924	5.9286	3.05536e-09	4.95448e-08	2.92e-08	3.61747e-07
CDHR1	260.147	-2.8629	0.483196	-5.92491	3.12462e-09	5.06242e-08	2.98361e-08	3.61747e-07
ENPP6	247.678	-3.18679	0.538082	-5.9225	3.17076e-09	5.13275e-08	3.02506e-08	3.61747e-07
SH2B3	1230.46	0.916954	0.154882	5.92033	3.21291e-09	5.19651e-08	3.06264e-08	3.61747e-07
LRRC17	380.792	-2.26053	0.381897	-5.91921	3.23483e-09	5.22298e-08	3.07824e-08	3.61747e-07
HIC2	313.92	-1.24208	0.209838	-5.91924	3.23432e-09	5.22298e-08	3.07824e-08	3.61747e-07
TNS3	3070.43	1.471	0.248526	5.91889	3.24128e-09	5.2289e-08	3.08173e-08	3.61747e-07
INKA1	109.907	1.43832	0.24314	5.9156	3.30664e-09	5.32976e-08	3.14118e-08	3.61747e-07
ABR	4954.47	-1.50257	0.254075	-5.91388	3.34151e-09	5.38134e-08	3.17157e-08	3.61747e-07
C5orf58	3.36151	1.9144	0.323804	5.91221	3.37547e-09	5.43139e-08	3.20107e-08	3.61747e-07
SWAP70	1162.83	0.785473	0.13294	5.90849	3.45264e-09	5.5508e-08	3.27145e-08	3.61747e-07
ZRANB1	722.531	-1.02082	0.172793	-5.90775	3.46819e-09	5.57104e-08	3.28337e-08	3.61747e-07
SLC9A5	200.997	-1.58868	0.268982	-5.90627	3.49939e-09	5.61636e-08	3.31009e-08	3.61747e-07
SLC12A1	68.6252	-3.02092	0.511682	-5.90391	3.54995e-09	5.69264e-08	3.35504e-08	3.61747e-07
PLEKHA6	395.787	2.79591	0.473618	5.9033	3.56305e-09	5.70638e-08	3.36314e-08	3.61747e-07
EID2	1133.78	-0.819775	0.138872	-5.90309	3.56763e-09	5.70638e-08	3.36314e-08	3.61747e-07
FAM177B	25.579	1.59645	0.270437	5.90321	3.56488e-09	5.70638e-08	3.36314e-08	3.61747e-07
AP1S1	4950.13	-1.29487	0.2194	-5.90184	3.5946e-09	5.74463e-08	3.38568e-08	3.61747e-07
CD226	26.6472	1.5515	0.262965	5.90004	3.63414e-09	5.8029e-08	3.42002e-08	3.61747e-07
TINCR	78.6915	-2.40011	0.406905	-5.89844	3.66944e-09	5.85428e-08	3.45031e-08	3.61747e-07
HSD3B2	18879.9	-3.22788	0.547425	-5.89648	3.71336e-09	5.91932e-08	3.48864e-08	3.61747e-07
CTDSPL2	912.991	-0.602348	0.102157	-5.8963	3.71747e-09	5.92086e-08	3.48955e-08	3.61747e-07
NECTIN3	867.99	-1.50155	0.254692	-5.89553	3.7347e-09	5.94327e-08	3.50275e-08	3.61747e-07
BOK	477.834	-2.0615	0.349731	-5.89452	3.75763e-09	5.9747e-08	3.52128e-08	3.61747e-07
KLHDC7B	29.4145	2.29419	0.389614	5.88837	3.90025e-09	6.19623e-08	3.65184e-08	3.61747e-07
SIAH2	6166.35	-1.06058	0.18012	-5.88819	3.90445e-09	6.19766e-08	3.65268e-08	3.61747e-07
ZNF92	548.466	-0.702623	0.119334	-5.8879	3.91143e-09	6.2035e-08	3.65613e-08	3.61747e-07
HOXC13	260.302	-2.98752	0.507484	-5.88691	3.93479e-09	6.23528e-08	3.67486e-08	3.61747e-07
ITPRIP	1948.94	0.901605	0.153181	5.88589	3.95925e-09	6.26875e-08	3.69458e-08	3.61747e-07
ABCB6	441.706	-1.14823	0.195095	-5.88549	3.96887e-09	6.2787e-08	3.70044e-08	3.61747e-07
PELI1	424.076	0.849748	0.144395	5.88488	3.98354e-09	6.2966e-08	3.711e-08	3.61747e-07
LAT2	288.771	1.40153	0.238279	5.88188	4.05632e-09	6.40625e-08	3.77562e-08	3.61747e-07
SPINT2	1360.17	1.84023	0.312875	5.88166	4.06176e-09	6.40947e-08	3.77752e-08	3.61747e-07
DAAM2	1057.9	-1.75471	0.298531	-5.87782	4.15699e-09	6.55423e-08	3.86283e-08	3.61747e-07
UNC13B	1726.44	-0.920017	0.156672	-5.87225	4.29926e-09	6.77287e-08	3.99169e-08	3.61747e-07
LGALS14	6.9662	-4.69595	0.800049	-5.86958	4.36914e-09	6.87718e-08	4.05317e-08	3.61747e-07
CFAP57	86.3748	-3.06272	0.52182	-5.86931	4.37625e-09	6.88261e-08	4.05637e-08	3.61747e-07
APEX1	5497.01	-0.685987	0.116891	-5.86863	4.39423e-09	6.90511e-08	4.06963e-08	3.61747e-07
CETP	195.994	1.84725	0.314806	5.86789	4.41385e-09	6.93015e-08	4.08439e-08	3.61747e-07
CCL23	7.6563	2.98104	0.508308	5.86463	4.50133e-09	7.0616e-08	4.16186e-08	3.61747e-07
ADGRF2	2.34428	4.14468	0.706799	5.86401	4.51814e-09	7.08206e-08	4.17392e-08	3.61747e-07
GFRA1	144.333	2.63442	0.449341	5.86286	4.54958e-09	7.12541e-08	4.19947e-08	3.61747e-07
BRF1	1743.71	-0.628679	0.107316	-5.85819	4.67928e-09	7.32243e-08	4.31559e-08	3.61747e-07
UNC13C	24.9876	3.66829	0.626225	5.85778	4.69102e-09	7.3347e-08	4.32281e-08	3.61747e-07
PRLR	7524.38	2.59449	0.443256	5.85327	4.82011e-09	7.53027e-08	4.43808e-08	3.61747e-07
SPAG17	90.9956	2.62284	0.448187	5.85212	4.85358e-09	7.57626e-08	4.46518e-08	3.61747e-07
ASAH2B	243.808	-0.842744	0.144017	-5.85168	4.8662e-09	7.58965e-08	4.47308e-08	3.61747e-07
UBE2Q2	1631.05	-0.728416	0.124506	-5.85047	4.90185e-09	7.63892e-08	4.50211e-08	3.61747e-07
ASCC1	1157.05	-0.679296	0.11617	-5.84745	4.99181e-09	7.7598e-08	4.57336e-08	3.61747e-07
OXER1	27.7958	2.04606	0.349899	5.84758	4.9877e-09	7.7598e-08	4.57336e-08	3.61747e-07
ZNF488	15.9543	-2.16204	0.369731	-5.84761	4.98695e-09	7.7598e-08	4.57336e-08	3.61747e-07
SLC7A4	364.874	3.46078	0.591974	5.84617	5.03029e-09	7.81317e-08	4.60481e-08	3.61747e-07
SYNDIG1	210.02	-3.04371	0.520732	-5.84507	5.06347e-09	7.8582e-08	4.63135e-08	3.61747e-07
RRP12	2918.37	-0.745929	0.127628	-5.84454	5.07966e-09	7.87683e-08	4.64233e-08	3.61747e-07
SLC4A7	502.709	1.17136	0.200576	5.84	5.22017e-09	8.08804e-08	4.76681e-08	3.61747e-07
FUT1	273.759	-2.19322	0.375582	-5.83951	5.23541e-09	8.10496e-08	4.77678e-08	3.61747e-07
BCL2	161.38	1.51416	0.259335	5.83864	5.26277e-09	8.13393e-08	4.79385e-08	3.61747e-07
SELENOP	3743.82	1.70846	0.292608	5.83872	5.26045e-09	8.13393e-08	4.79385e-08	3.61747e-07
MSX1	1006.83	-1.30135	0.222971	-5.83642	5.33356e-09	8.23657e-08	4.85434e-08	3.61747e-07
COX6A2	19.5384	2.98581	0.511638	5.83579	5.35376e-09	8.26097e-08	4.86872e-08	3.61747e-07
PDE7B	497.739	-1.44527	0.247674	-5.83537	5.36701e-09	8.27462e-08	4.87677e-08	3.61747e-07
ATP8B3	942.56	-1.42669	0.244539	-5.83419	5.4053e-09	8.32683e-08	4.90754e-08	3.61747e-07
PCIF1	4166.74	1.05672	0.181153	5.83328	5.43468e-09	8.36522e-08	4.93017e-08	3.61747e-07
HPN	25.059	3.19984	0.54882	5.8304	5.52953e-09	8.50426e-08	5.01211e-08	3.61747e-07
FNTB	698.121	-0.653032	0.11202	-5.82957	5.55698e-09	8.53948e-08	5.03287e-08	3.61747e-07
SEC61A2	307.064	-0.755859	0.129701	-5.8277	5.61967e-09	8.62876e-08	5.08549e-08	3.61747e-07
TAMALIN	202.831	1.21129	0.207882	5.82679	5.65024e-09	8.66861e-08	5.10898e-08	3.61747e-07
CHST8	289.679	-3.57259	0.613413	-5.82412	5.74139e-09	8.80127e-08	5.18716e-08	3.61747e-07
SHH	1102.6	-2.67601	0.45953	-5.82337	5.76723e-09	8.83369e-08	5.20627e-08	3.61747e-07
RNF31	703.824	-0.855873	0.147014	-5.82172	5.82435e-09	8.91391e-08	5.25354e-08	3.61747e-07
CYB5A	1514.61	1.85313	0.318404	5.82006	5.8828e-09	8.99604e-08	5.30195e-08	3.61747e-07
GMNN	963.62	-1.09923	0.18893	-5.81818	5.94935e-09	9.09041e-08	5.35757e-08	3.61747e-07
NSMCE1	2609.31	0.785725	0.135056	5.81775	5.96445e-09	9.10608e-08	5.3668e-08	3.61747e-07
GLI1	60.5176	-2.06719	0.355514	-5.81465	6.07594e-09	9.26877e-08	5.46269e-08	3.61747e-07
HDC	28.7569	4.23603	0.728543	5.81438	6.08595e-09	9.27651e-08	5.46725e-08	3.61747e-07
PLA2G4D	200.983	-2.51097	0.431872	-5.81416	6.09403e-09	9.2813e-08	5.47007e-08	3.61747e-07
CD44	2698.13	1.75099	0.301175	5.81387	6.10457e-09	9.28982e-08	5.47509e-08	3.61747e-07
EMB	3758.71	2.75641	0.47419	5.81287	6.14092e-09	9.33758e-08	5.50324e-08	3.61747e-07
NAALADL1	47.5105	1.12627	0.193781	5.81207	6.17049e-09	9.37495e-08	5.52527e-08	3.61747e-07
TBX10	4.26287	4.10557	0.706485	5.81127	6.20021e-09	9.41251e-08	5.5474e-08	3.61747e-07
DHX32	2594.18	-0.89292	0.153714	-5.80896	6.28611e-09	9.5352e-08	5.61971e-08	3.61747e-07
PBX1	3719.24	-1.26957	0.218658	-5.80621	6.39039e-09	9.68557e-08	5.70833e-08	3.61747e-07
CCL13	55.4284	3.79281	0.653372	5.80497	6.43761e-09	9.74927e-08	5.74588e-08	3.61747e-07
RHBDF2	657.001	1.14515	0.197299	5.80414	6.46977e-09	9.79008e-08	5.76993e-08	3.61747e-07
MYO7B	27.216	1.49792	0.258117	5.80326	6.50393e-09	9.83386e-08	5.79573e-08	3.61747e-07
PLIN2	2344.81	1.79206	0.308831	5.80271	6.52497e-09	9.85774e-08	5.8098e-08	3.61747e-07
CCDC68	56.5203	2.09735	0.36159	5.80035	6.61751e-09	9.98151e-08	5.88275e-08	3.61747e-07
VKORC1L1	1965.41	-0.678788	0.117024	-5.8004	6.61559e-09	9.98151e-08	5.88275e-08	3.61747e-07
DIRAS2	92.7106	3.56728	0.615059	5.79991	6.63524e-09	1.00002e-07	5.89378e-08	3.61747e-07
KDM5B	1796.39	-0.837443	0.144442	-5.79776	6.72068e-09	1.01128e-07	5.96011e-08	3.61747e-07
APOL6	1086.58	1.04962	0.181035	5.79789	6.71557e-09	1.01128e-07	5.96011e-08	3.61747e-07
CITED1	74.2524	-1.85192	0.319474	-5.79678	6.75995e-09	1.01637e-07	5.99014e-08	3.61747e-07
PPP6R1	5792.45	-0.642167	0.110808	-5.79531	6.81934e-09	1.02448e-07	6.03794e-08	3.61747e-07
PARD6B	277.989	1.25472	0.216652	5.79144	6.97865e-09	1.04758e-07	6.17406e-08	3.61747e-07
ATG9A	4224.04	-0.685516	0.118473	-5.78626	7.19725e-09	1.07953e-07	6.36237e-08	3.61747e-07
NCKAP5L	2908.92	-0.794072	0.137259	-5.78521	7.24233e-09	1.08543e-07	6.39712e-08	3.61747e-07
GFI1	25.9144	1.69032	0.292215	5.78451	7.27241e-09	1.08907e-07	6.41857e-08	3.61747e-07
PURB	2869.91	-0.657656	0.113712	-5.78351	7.31562e-09	1.09466e-07	6.45156e-08	3.61747e-07
LGI3	139.088	-2.52116	0.435974	-5.78282	7.34603e-09	1.09834e-07	6.47323e-08	3.61747e-07
PPP2R1A	33573.2	-0.868949	0.150271	-5.78255	7.35781e-09	1.09923e-07	6.47845e-08	3.61747e-07
CCDC88B	734.744	0.988465	0.170966	5.78166	7.39693e-09	1.10419e-07	6.50772e-08	3.61747e-07
SS18	2742.96	-0.844012	0.146041	-5.77928	7.50206e-09	1.11811e-07	6.58975e-08	3.61747e-07
AJM1	628.504	-1.09743	0.189886	-5.77939	7.49713e-09	1.11811e-07	6.58975e-08	3.61747e-07
EFNA2	47.9373	-3.14882	0.544978	-5.77789	7.56436e-09	1.1265e-07	6.63921e-08	3.61747e-07
EMX1	24.5583	-3.69741	0.640199	-5.77542	7.67629e-09	1.14227e-07	6.73211e-08	3.61747e-07
SHC4	90.602	-1.98284	0.343356	-5.77487	7.70132e-09	1.14508e-07	6.74872e-08	3.61747e-07
FAM169A	426.092	-2.21489	0.383569	-5.77441	7.72224e-09	1.14729e-07	6.76171e-08	3.61747e-07
SYT13	48.8211	3.67229	0.637029	5.76472	8.17939e-09	1.21425e-07	7.15634e-08	3.61747e-07
DOT1L	1847.1	-1.05957	0.183911	-5.76133	8.3453e-09	1.2379e-07	7.29573e-08	3.61747e-07
CHST10	816.57	-1.09947	0.190852	-5.76087	8.36797e-09	1.23982e-07	7.30709e-08	3.61747e-07
IL18BP	424.545	1.01729	0.176589	5.7608	8.37149e-09	1.23982e-07	7.30709e-08	3.61747e-07
NTM	242.524	-3.04315	0.528303	-5.76024	8.39961e-09	1.24301e-07	7.32587e-08	3.61747e-07
NINJ2	54.8507	2.01251	0.349433	5.75935	8.44389e-09	1.24858e-07	7.35869e-08	3.61747e-07
FCGR1A	101.383	1.81141	0.314552	5.7587	8.47642e-09	1.2524e-07	7.38123e-08	3.61747e-07
PPM1L	1473.75	1.50196	0.260829	5.7584	8.49133e-09	1.25362e-07	7.38841e-08	3.61747e-07
MPV17L2	2004.67	-1.02898	0.178736	-5.75696	8.56442e-09	1.26342e-07	7.44615e-08	3.61747e-07
SELENOS	3667.76	-0.841823	0.14637	-5.75134	8.85385e-09	1.30509e-07	7.69175e-08	3.61747e-07
NCBP1	1531.95	-0.658573	0.11456	-5.7487	8.99326e-09	1.3246e-07	7.80675e-08	3.61747e-07
PRRX2	261.628	-2.97877	0.51824	-5.74786	9.03802e-09	1.33015e-07	7.83946e-08	3.61747e-07
TAF7L	30.2849	-2.43531	0.423708	-5.74762	9.05065e-09	1.33097e-07	7.84426e-08	3.61747e-07
FOXD2	57.5842	1.54084	0.268163	5.74592	9.14206e-09	1.34336e-07	7.9173e-08	3.61747e-07
TGFBI	5746.64	2.31839	0.40353	5.74527	9.17758e-09	1.34753e-07	7.94185e-08	3.61747e-07
CTRB2	20.8206	-3.06251	0.533264	-5.74296	9.30349e-09	1.36393e-07	8.03853e-08	3.61747e-07
ZC3H12D	33.2947	1.53177	0.266721	5.74296	9.30382e-09	1.36393e-07	8.03853e-08	3.61747e-07
NFIX	2246.62	-1.29516	0.225647	-5.7398	9.47909e-09	1.38854e-07	8.18358e-08	3.61747e-07
MIP	24.0067	-1.3334	0.232381	-5.73802	9.5792e-09	1.40102e-07	8.25714e-08	3.61747e-07
SMPD1	3727.35	0.910226	0.15863	5.73806	9.57669e-09	1.40102e-07	8.25714e-08	3.61747e-07
GUCY1B1	265.502	1.24338	0.216778	5.73572	9.70979e-09	1.41902e-07	8.36319e-08	3.61747e-07
CHL1	967.314	-4.36002	0.760175	-5.73554	9.71994e-09	1.4194e-07	8.36543e-08	3.61747e-07
SDHD	2684.17	0.538099	0.0938392	5.73426	9.79373e-09	1.42906e-07	8.4224e-08	3.61747e-07
PGM5	3686.25	-1.76041	0.307041	-5.73348	9.83929e-09	1.4346e-07	8.45501e-08	3.61747e-07
PCYT1B	356.426	2.77394	0.483875	5.73275	9.88159e-09	1.43965e-07	8.48478e-08	3.61747e-07
COX6B2	26.1177	-2.70426	0.471776	-5.73208	9.92088e-09	1.44425e-07	8.51192e-08	3.61747e-07
SHISAL2A	21.102	1.79607	0.313406	5.73082	9.99439e-09	1.45383e-07	8.56835e-08	3.61747e-07
AACS	3062.27	-1.30447	0.227677	-5.72947	1.00746e-08	1.46437e-07	8.63048e-08	3.64113e-07
TIAL1	2822.05	-0.528388	0.0922285	-5.72912	1.00953e-08	1.46624e-07	8.64149e-08	3.64767e-07
SLC15A2	106.531	1.58852	0.277351	5.72746	1.01946e-08	1.47952e-07	8.71975e-08	3.67915e-07
PLPP3	2366.39	1.39554	0.243689	5.72675	1.02373e-08	1.48457e-07	8.74954e-08	3.6927e-07
FXYD5	2684.17	1.77533	0.310103	5.72497	1.03451e-08	1.49905e-07	8.83485e-08	3.7269e-07
DHRS2	1127.41	-2.62326	0.458307	-5.7238	1.0417e-08	1.50829e-07	8.88934e-08	3.7497e-07
P2RY10	6.74402	2.47022	0.43159	5.72354	1.04325e-08	1.50939e-07	8.89579e-08	3.75465e-07
DNAAF2	459.126	-0.626107	0.109395	-5.72334	1.04453e-08	1.51007e-07	8.89981e-08	3.7587e-07
H2BC21	1582.26	-1.68928	0.295177	-5.72295	1.04693e-08	1.51238e-07	8.91342e-08	3.76632e-07
PSMC6	2636.56	-0.605655	0.105844	-5.72212	1.05202e-08	1.51856e-07	8.94983e-08	3.78247e-07
CNTNAP2	169.232	-2.81994	0.492824	-5.72199	1.05283e-08	1.51856e-07	8.94985e-08	3.78504e-07
GPR82	19.0639	1.99391	0.348627	5.71933	1.06946e-08	1.54137e-07	9.08428e-08	3.83789e-07
TMEM184A	965.415	2.25315	0.393993	5.71875	1.07308e-08	1.5454e-07	9.10804e-08	3.8494e-07
NSMCE4A	1144.13	-0.579767	0.10142	-5.71649	1.08745e-08	1.56416e-07	9.21859e-08	3.89511e-07
RAN	17864.6	-1.01129	0.176908	-5.71644	1.08777e-08	1.56416e-07	9.21859e-08	3.89611e-07
DPYSL4	681.276	-2.15592	0.377231	-5.71511	1.09631e-08	1.57524e-07	9.28389e-08	3.9233e-07
CLEC4E	48.8687	1.97077	0.345025	5.71198	1.11669e-08	1.60263e-07	9.44533e-08	3.98817e-07
CHST15	443.878	1.41421	0.24759	5.71192	1.11708e-08	1.60263e-07	9.44533e-08	3.98943e-07
ATG4D	1462.8	-0.683501	0.119717	-5.7093	1.13445e-08	1.6263e-07	9.58486e-08	4.04478e-07
HDAC4	837.26	-0.793227	0.138984	-5.70732	1.14767e-08	1.644e-07	9.68917e-08	4.08695e-07
DIPK1B	454.951	-1.62294	0.284452	-5.70549	1.16007e-08	1.6605e-07	9.78641e-08	4.12653e-07
ANXA8	9.18105	3.57971	0.627575	5.70403	1.17005e-08	1.67351e-07	9.86308e-08	4.15839e-07
SH3YL1	2012.28	-1.23416	0.216373	-5.70387	1.17119e-08	1.67386e-07	9.86517e-08	4.16203e-07
PAX1	244.019	5.06543	0.888488	5.70117	1.18987e-08	1.69927e-07	1.00149e-07	4.22172e-07
NAA40	1593.49	0.892619	0.156574	5.70094	1.19149e-08	1.7003e-07	1.00209e-07	4.22691e-07
VWCE	214.768	-1.47288	0.258373	-5.7006	1.19388e-08	1.70241e-07	1.00334e-07	4.23454e-07
PLCH1	11.4745	2.19299	0.384799	5.69904	1.2048e-08	1.71669e-07	1.01175e-07	4.26949e-07
MC5R	2.8077	-3.56559	0.625872	-5.697	1.21936e-08	1.7361e-07	1.0232e-07	4.31606e-07
PNLIPRP3	200.535	3.29884	0.579128	5.69622	1.22496e-08	1.74276e-07	1.02712e-07	4.33401e-07
FMNL1	570.691	1.55227	0.27259	5.69452	1.23716e-08	1.75879e-07	1.03657e-07	4.37309e-07
DCAF15	1587.92	-0.66898	0.11752	-5.69247	1.25217e-08	1.77879e-07	1.04835e-07	4.42122e-07
VIPR1	31.012	1.6879	0.29657	5.69142	1.25988e-08	1.78838e-07	1.05401e-07	4.44593e-07
ZNF138	594.361	-0.836582	0.147003	-5.6909	1.26373e-08	1.79249e-07	1.05643e-07	4.45828e-07
RAB27B	54.0918	3.59245	0.631346	5.69014	1.26934e-08	1.79909e-07	1.06032e-07	4.47628e-07
TUBB2B	74.3379	-2.01527	0.354229	-5.68917	1.2766e-08	1.80802e-07	1.06558e-07	4.49959e-07
PIP5KL1	38.4704	-1.78051	0.312995	-5.68863	1.28065e-08	1.81239e-07	1.06816e-07	4.51261e-07
TAOK2	5187.76	-0.599426	0.105397	-5.68733	1.29044e-08	1.82487e-07	1.07551e-07	4.54404e-07
LYL1	144.831	1.21686	0.213986	5.68665	1.29553e-08	1.83069e-07	1.07894e-07	4.56041e-07
TRNP1	353.456	1.81934	0.320016	5.68513	1.3071e-08	1.84565e-07	1.08776e-07	4.59759e-07
HNRNPK	21795	-0.316172	0.0556295	-5.68353	1.3194e-08	1.86162e-07	1.09718e-07	4.63718e-07
CLECL1	11.6665	2.09757	0.369251	5.68062	1.34206e-08	1.89218e-07	1.11518e-07	4.71014e-07
HLA-DPA1	5859.89	1.74656	0.307484	5.68017	1.34557e-08	1.8957e-07	1.11726e-07	4.72145e-07
FTL	95852.6	1.00861	0.177689	5.67628	1.37655e-08	1.93781e-07	1.14208e-07	4.82134e-07
MRPL50	2305.73	-0.665652	0.117272	-5.67616	1.37752e-08	1.93781e-07	1.14208e-07	4.82447e-07
WDR5	1908.4	-0.727515	0.128238	-5.67316	1.40191e-08	1.97064e-07	1.16143e-07	4.90324e-07
LARP4B	3156.02	-0.673783	0.118777	-5.6727	1.40566e-08	1.97443e-07	1.16366e-07	4.91535e-07
IL13	8.51678	-2.75221	0.485347	-5.67059	1.42304e-08	1.99735e-07	1.17717e-07	4.97155e-07
ST3GAL5	8729.22	-1.24119	0.218906	-5.66994	1.42843e-08	2.00343e-07	1.18075e-07	4.98901e-07
HR	159.794	-2.35166	0.414822	-5.66908	1.43565e-08	2.01206e-07	1.18584e-07	5.01238e-07
EMG1	934.653	0.661708	0.116741	5.66817	1.44327e-08	2.02122e-07	1.19123e-07	5.03703e-07
PPP2R5B	1189.4	-0.692242	0.122134	-5.6679	1.4456e-08	2.02299e-07	1.19228e-07	5.0446e-07
TMPRSS3	96.0803	-4.29895	0.758513	-5.66761	1.44806e-08	2.02492e-07	1.19342e-07	5.05256e-07
SAR1A	5504.72	-0.57219	0.101075	-5.66104	1.50456e-08	2.10235e-07	1.23905e-07	5.23583e-07
PRSS22	48.4887	2.99125	0.528423	5.66071	1.50744e-08	2.10482e-07	1.2405e-07	5.2452e-07
GSG1	5.45849	2.29105	0.404784	5.65995	1.51421e-08	2.1127e-07	1.24515e-07	5.26721e-07
CELF4	83.1683	-2.45377	0.433563	-5.65954	1.51779e-08	2.11494e-07	1.24647e-07	5.27882e-07
POLG	1567.19	-0.630049	0.111326	-5.65951	1.51806e-08	2.11494e-07	1.24647e-07	5.27973e-07
SH2D3C	597.928	1.01829	0.180038	5.65601	1.54934e-08	2.15691e-07	1.27121e-07	5.3815e-07
C1GALT1C1L	106.63	-1.70856	0.302086	-5.65588	1.55054e-08	2.15698e-07	1.27125e-07	5.38539e-07
MMD2	103.127	-3.77091	0.666745	-5.6557	1.55212e-08	2.15758e-07	1.2716e-07	5.39055e-07
SBK1	1109.07	-1.75258	0.310053	-5.65251	1.58125e-08	2.19645e-07	1.29451e-07	5.48549e-07
DOLPP1	1259.77	-0.835433	0.14783	-5.65132	1.59218e-08	2.21e-07	1.3025e-07	5.52116e-07
ZNF496	773.411	-0.791917	0.140179	-5.64932	1.61081e-08	2.23421e-07	1.31677e-07	5.582e-07
SEMG1	746.116	4.29515	0.760461	5.64809	1.62245e-08	2.24727e-07	1.32446e-07	5.62004e-07
TGFA	189.072	2.34413	0.415033	5.64807	1.62261e-08	2.24727e-07	1.32446e-07	5.62058e-07
HDAC9	179.844	1.61151	0.285345	5.64759	1.62714e-08	2.25188e-07	1.32718e-07	5.63539e-07
MMS19	2361.55	-0.562143	0.0995803	-5.64512	1.65068e-08	2.28277e-07	1.34538e-07	5.71238e-07
CD5L	12.0372	4.02531	0.713189	5.6441	1.66049e-08	2.29297e-07	1.35139e-07	5.74453e-07
SELP	54.8179	2.43363	0.431174	5.6442	1.65948e-08	2.29297e-07	1.35139e-07	5.74123e-07
TLE6	127.567	-1.85627	0.328912	-5.64368	1.66456e-08	2.2969e-07	1.35371e-07	5.75787e-07
MSN	7904.47	1.21065	0.214582	5.6419	1.68186e-08	2.31903e-07	1.36676e-07	5.81456e-07
NDEL1	1938.67	-0.725719	0.128633	-5.64177	1.68307e-08	2.31903e-07	1.36676e-07	5.81854e-07
METRNL	638.141	1.80824	0.320574	5.64064	1.69419e-08	2.33265e-07	1.37478e-07	5.85502e-07
MYO9B	6557.17	-0.746753	0.132409	-5.63976	1.70287e-08	2.34288e-07	1.38081e-07	5.88352e-07
CAV1	1638.58	1.28298	0.227538	5.63853	1.71509e-08	2.35681e-07	1.38902e-07	5.92363e-07
CDHR3	76.7645	-1.03991	0.184431	-5.63849	1.71551e-08	2.35681e-07	1.38902e-07	5.92501e-07
SFXN3	3715.41	-1.13271	0.20091	-5.63788	1.72158e-08	2.36343e-07	1.39292e-07	5.94496e-07
ABAT	7343.91	2.10393	0.373222	5.63719	1.72846e-08	2.37114e-07	1.39747e-07	5.96757e-07
FOXA2	196.145	-5.42082	0.962036	-5.63474	1.75321e-08	2.40158e-07	1.41541e-07	6.04899e-07
PEBP4	133.437	2.97745	0.528406	5.63478	1.7528e-08	2.40158e-07	1.41541e-07	6.04764e-07
DCBLD2	3157.46	-1.37585	0.244204	-5.63399	1.76084e-08	2.41028e-07	1.42054e-07	6.07413e-07
FGD3	150.87	1.28213	0.227637	5.63234	1.77785e-08	2.4318e-07	1.43322e-07	6.13017e-07
TMEM9	7256.66	-0.87956	0.156193	-5.63124	1.78915e-08	2.44501e-07	1.44101e-07	6.16745e-07
RIN1	509.55	1.59858	0.283882	5.63115	1.79011e-08	2.44501e-07	1.44101e-07	6.17062e-07
PRR18	25.1771	-2.91625	0.517933	-5.63056	1.79622e-08	2.45157e-07	1.44487e-07	6.19076e-07
APBB2	1198.63	0.937844	0.16658	5.62998	1.8023e-08	2.4563e-07	1.44766e-07	6.21082e-07
ZNF836	1428.46	-1.51479	0.269058	-5.63	1.80209e-08	2.4563e-07	1.44766e-07	6.21014e-07
MYEOV	34.4135	-2.59028	0.460519	-5.62471	1.85825e-08	2.53072e-07	1.49152e-07	6.39579e-07
CCNA1	6.9239	2.79215	0.496484	5.62384	1.86753e-08	2.54152e-07	1.49788e-07	6.42653e-07
KCTD12	2803.82	1.26814	0.225519	5.62318	1.87478e-08	2.54954e-07	1.50261e-07	6.45055e-07
CCDC187	26.0195	4.29972	0.764672	5.62296	1.87712e-08	2.55087e-07	1.50339e-07	6.45827e-07
ECM1	1162.49	1.75606	0.312342	5.62224	1.88502e-08	2.55976e-07	1.50863e-07	6.48447e-07
JAKMIP1	272.866	-2.66486	0.474	-5.62206	1.88699e-08	2.56058e-07	1.50912e-07	6.49101e-07
PIH1D1	2765.35	-0.638276	0.113552	-5.62099	1.89871e-08	2.57091e-07	1.51521e-07	6.52987e-07
CPA6	3.38319	2.73675	0.486878	5.62102	1.89836e-08	2.57091e-07	1.51521e-07	6.52873e-07
STK38L	1108.66	0.689979	0.122747	5.62116	1.89676e-08	2.57091e-07	1.51521e-07	6.52342e-07
FAM155A	189.579	-2.71451	0.482999	-5.62013	1.90815e-08	2.58184e-07	1.52165e-07	6.56122e-07
TBX1	35.4826	-2.57505	0.458292	-5.6188	1.92289e-08	2.59992e-07	1.5323e-07	6.61017e-07
FOXB1	11.9152	-4.86121	0.865254	-5.61824	1.92908e-08	2.60641e-07	1.53612e-07	6.63073e-07
S100A3	31.5407	1.7926	0.319117	5.61737	1.93889e-08	2.61778e-07	1.54283e-07	6.66334e-07
INPP5A	1363.83	-0.772767	0.137671	-5.61312	1.98709e-08	2.68094e-07	1.58005e-07	6.82384e-07
RABGAP1L	892.737	0.744874	0.132721	5.61234	1.99611e-08	2.69118e-07	1.58608e-07	6.85392e-07
MYO3A	113.524	3.97744	0.708727	5.61209	1.999e-08	2.69313e-07	1.58724e-07	6.86354e-07
AFAP1L2	175.057	1.16821	0.208202	5.61097	2.01199e-08	2.7087e-07	1.59641e-07	6.90691e-07
QPCTL	1097.3	-0.848346	0.151231	-5.60959	2.02807e-08	2.72644e-07	1.60687e-07	6.9606e-07
ADGRA3	1353.74	-0.89876	0.160215	-5.6097	2.02675e-08	2.72644e-07	1.60687e-07	6.95619e-07
GOLIM4	1227.31	0.848824	0.151359	5.608	2.04676e-08	2.7496e-07	1.62052e-07	7.02308e-07
ANXA4	3000.23	1.14115	0.203588	5.60518	2.08043e-08	2.79283e-07	1.646e-07	7.13578e-07
CCL4L2	118.302	2.13077	0.380161	5.60491	2.08359e-08	2.79508e-07	1.64732e-07	7.14638e-07
CAVIN3	1091.11	1.93501	0.345267	5.60438	2.08997e-08	2.80164e-07	1.65119e-07	7.16777e-07
DHRS9	26.7123	2.29237	0.409241	5.6015	2.12503e-08	2.8466e-07	1.67768e-07	7.28538e-07
VNN3	3.35146	2.83803	0.506718	5.60081	2.13348e-08	2.85589e-07	1.68316e-07	7.31377e-07
CACNG7	5.60994	-4.55972	0.814211	-5.60017	2.14147e-08	2.86453e-07	1.68826e-07	7.34061e-07
UGT2A3	27.6238	4.19693	0.749472	5.59985	2.14538e-08	2.86773e-07	1.69014e-07	7.35376e-07
GRK7	6.90806	-2.03649	0.36374	-5.59875	2.15904e-08	2.88394e-07	1.69969e-07	7.3997e-07
FCGR2B	129.46	2.0795	0.371497	5.59763	2.17304e-08	2.90058e-07	1.7095e-07	7.44683e-07
ANKEF1	532.372	1.00711	0.179947	5.59672	2.18446e-08	2.91375e-07	1.71726e-07	7.48528e-07
CCL4	157.676	1.88628	0.337053	5.59637	2.1888e-08	2.91747e-07	1.71946e-07	7.49991e-07
FTH1	13838.4	1.15713	0.206828	5.59462	2.2111e-08	2.9451e-07	1.73574e-07	7.57507e-07
PUS7L	808.074	0.764093	0.136612	5.59314	2.22998e-08	2.96815e-07	1.74932e-07	7.63881e-07
ACYP1	531.965	-1.20028	0.214611	-5.5928	2.23438e-08	2.9719e-07	1.75154e-07	7.65367e-07
HACD4	353.284	1.72667	0.308764	5.59221	2.24204e-08	2.97998e-07	1.75629e-07	7.67953e-07
MPP3	169.043	-1.74066	0.311359	-5.59054	2.26362e-08	3.00653e-07	1.77195e-07	7.75249e-07
CCL2	387.728	2.00682	0.359125	5.58808	2.29597e-08	3.04735e-07	1.796e-07	7.86201e-07
S100Z	3.38443	1.77283	0.317306	5.58713	2.3085e-08	3.06182e-07	1.80453e-07	7.90447e-07
CHRNA2	95.3976	-3.53002	0.632182	-5.58387	2.3522e-08	3.11757e-07	1.83739e-07	8.05277e-07
ACY3	43.1898	3.43378	0.614981	5.58355	2.35654e-08	3.12113e-07	1.83949e-07	8.06753e-07
HERC2	2431.24	-0.615244	0.1102	-5.58296	2.36457e-08	3.12956e-07	1.84445e-07	8.09482e-07
HCFC1R1	4829.2	1.24128	0.222415	5.5809	2.39278e-08	3.16371e-07	1.86458e-07	8.19078e-07
LEF1	2096.52	-1.98675	0.355995	-5.58083	2.39374e-08	3.16371e-07	1.86458e-07	8.19404e-07
TYW5	281.093	-0.57318	0.102745	-5.57868	2.42344e-08	3.20071e-07	1.88639e-07	8.29524e-07
NSD1	2527.61	-0.536411	0.0962116	-5.57532	2.47071e-08	3.26086e-07	1.92183e-07	8.45661e-07
BTD	1020.86	0.770207	0.138152	5.57505	2.47456e-08	3.26135e-07	1.92212e-07	8.46974e-07
CALHM6	151.652	1.57145	0.281867	5.57515	2.47315e-08	3.26135e-07	1.92212e-07	8.46495e-07
IDI1	12122.4	-1.63797	0.293835	-5.57446	2.48299e-08	3.26788e-07	1.92598e-07	8.49859e-07
CD300LB	14.6677	1.76756	0.317077	5.57456	2.48161e-08	3.26788e-07	1.92598e-07	8.49384e-07
TMEM71	28.5323	1.68849	0.302912	5.57418	2.48694e-08	3.27079e-07	1.92769e-07	8.51208e-07
VSIR	1834.07	1.21885	0.218723	5.57256	2.51021e-08	3.29908e-07	1.94436e-07	8.59172e-07
CREB3	3058.49	-0.729866	0.130984	-5.57216	2.51599e-08	3.30436e-07	1.94748e-07	8.6115e-07
DKK2	45.2122	2.95577	0.530498	5.57169	2.52284e-08	3.31105e-07	1.95142e-07	8.63497e-07
CCDC103	17.8013	-2.37491	0.426265	-5.57145	2.52628e-08	3.31325e-07	1.95271e-07	8.64676e-07
C11orf95	1355.83	1.1432	0.205199	5.57116	2.53047e-08	3.31643e-07	1.95459e-07	8.66111e-07
SMIM10L2B	3584.89	1.9344	0.347574	5.56542	2.61515e-08	3.42503e-07	2.01859e-07	8.95195e-07
GABRB2	155.509	2.63272	0.473162	5.5641	2.63502e-08	3.44865e-07	2.03252e-07	9.02038e-07
PI16	39.4153	-2.2202	0.399106	-5.56295	2.65259e-08	3.46922e-07	2.04464e-07	9.08089e-07
HTR7	11.2856	2.29217	0.412088	5.56233	2.66192e-08	3.47658e-07	2.04898e-07	9.11306e-07
COL13A1	126.132	-1.92847	0.346695	-5.56245	2.66015e-08	3.47658e-07	2.04898e-07	9.10696e-07
CBWD1	681.891	-0.966317	0.17373	-5.56219	2.66405e-08	3.47695e-07	2.04919e-07	9.12041e-07
SCPEP1	5435.86	0.825841	0.148487	5.56172	2.67129e-08	3.4839e-07	2.05329e-07	9.14541e-07
CD93	2032.38	1.04501	0.187897	5.5616	2.67307e-08	3.4839e-07	2.05329e-07	9.15156e-07
ARMH4	788.63	-1.19831	0.215502	-5.56053	2.68958e-08	3.50056e-07	2.06311e-07	9.20855e-07
SLC45A2	16.9671	-2.46032	0.442452	-5.56064	2.68788e-08	3.50056e-07	2.06311e-07	9.20266e-07
GFRA2	199.01	-2.17816	0.391854	-5.55861	2.71928e-08	3.53676e-07	2.08444e-07	9.31118e-07
KCTD1	562.288	-0.885407	0.159298	-5.55817	2.72622e-08	3.54333e-07	2.08832e-07	9.33519e-07
SQSTM1	24419.8	0.990994	0.178493	5.55202	2.82394e-08	3.66781e-07	2.16168e-07	9.67402e-07
SHF	224.872	-2.04126	0.367724	-5.55108	2.83918e-08	3.68505e-07	2.17184e-07	9.72698e-07
AKAP7	1622.74	-1.11407	0.200716	-5.55049	2.84876e-08	3.69493e-07	2.17766e-07	9.76029e-07
RAB8A	1824.16	-0.51819	0.0933648	-5.55016	2.85402e-08	3.6992e-07	2.18018e-07	9.77859e-07
CDH26	20.9666	1.4205	0.255997	5.54889	2.87485e-08	3.72363e-07	2.19458e-07	9.85112e-07
IPO4	327.123	-0.735493	0.132551	-5.54876	2.87706e-08	3.72393e-07	2.19475e-07	9.85882e-07
SLC2A4	638.802	-2.11681	0.381716	-5.54552	2.93087e-08	3.79096e-07	2.23426e-07	1.00465e-06
TEX10	1031.96	-0.583452	0.105219	-5.5451	2.93783e-08	3.79736e-07	2.23803e-07	1.00708e-06
TLDC2	66.3565	1.73212	0.312542	5.54205	2.98954e-08	3.86155e-07	2.27586e-07	1.02517e-06
BACE1	2631.72	-1.03396	0.186587	-5.54145	2.99983e-08	3.87217e-07	2.28212e-07	1.02877e-06
VAX2	98.7137	-2.34023	0.422383	-5.54056	3.0151e-08	3.88654e-07	2.29059e-07	1.03412e-06
C19orf84	6.55836	2.51094	0.453186	5.54063	3.01391e-08	3.88654e-07	2.29059e-07	1.0337e-06
AKT2	6728.26	-0.754004	0.136099	-5.54012	3.02268e-08	3.89364e-07	2.29478e-07	1.03677e-06
ACP1	5261.44	-0.725414	0.130942	-5.53995	3.02564e-08	3.89478e-07	2.29545e-07	1.03781e-06
DESI2	1429.46	-0.756952	0.136701	-5.5373	3.07175e-08	3.95143e-07	2.32884e-07	1.054e-06
HNRNPH3	4914.18	-0.44316	0.0800696	-5.53468	3.11794e-08	4.00811e-07	2.36224e-07	1.07025e-06
RASGRF2	214.371	1.03714	0.187488	5.53173	3.17079e-08	4.07048e-07	2.399e-07	1.08888e-06
VWC2	23.332	4.90607	0.886878	5.53185	3.16874e-08	4.07048e-07	2.399e-07	1.08815e-06
WSCD2	72.4337	-2.90015	0.5243	-5.53147	3.17558e-08	4.07384e-07	2.40098e-07	1.09057e-06
KLHL21	3561.67	0.822608	0.148722	5.53119	3.18067e-08	4.0776e-07	2.40319e-07	1.09237e-06
CHD8	2295.12	-0.578147	0.104539	-5.53046	3.19387e-08	4.09173e-07	2.41152e-07	1.09703e-06
OLFML3	700.185	1.97318	0.356846	5.52951	3.21121e-08	4.10834e-07	2.42131e-07	1.10315e-06
HPD	156.633	-2.8127	0.508667	-5.52954	3.2107e-08	4.10834e-07	2.42131e-07	1.10297e-06
TUBGCP5	838.964	-0.734893	0.132937	-5.52811	3.23693e-08	4.13843e-07	2.43904e-07	1.11225e-06
ASTE1	409.238	0.853367	0.154379	5.52774	3.24373e-08	4.14431e-07	2.44251e-07	1.11466e-06
SRMS	14.9384	-2.8804	0.521246	-5.526	3.27613e-08	4.18023e-07	2.46368e-07	1.12613e-06
ALLC	24.5396	-2.36943	0.428779	-5.52599	3.2763e-08	4.18023e-07	2.46368e-07	1.1262e-06
NHSL1	203.533	1.29552	0.234479	5.52512	3.29266e-08	4.19825e-07	2.4743e-07	1.132e-06
GRIN2D	300.412	-2.28861	0.414366	-5.52316	3.32965e-08	4.24254e-07	2.5004e-07	1.14513e-06
FOXL2NB	56.1652	-3.16961	0.573951	-5.52244	3.34321e-08	4.25693e-07	2.50889e-07	1.14995e-06
CCNP	20.8498	-1.81971	0.329751	-5.51844	3.42025e-08	4.35207e-07	2.56496e-07	1.17738e-06
PCDH12	829.272	0.917501	0.166369	5.51486	3.49056e-08	4.43853e-07	2.61592e-07	1.20249e-06
SLC47A1	6959.06	-1.742	0.315889	-5.51459	3.49588e-08	4.44229e-07	2.61813e-07	1.2044e-06
DEPP1	1616.57	1.74618	0.316682	5.514	3.50767e-08	4.45426e-07	2.62519e-07	1.20861e-06
MARK3	3102.44	-0.586334	0.106349	-5.51331	3.52141e-08	4.4687e-07	2.6337e-07	1.21354e-06
SNCAIP	418.957	2.6203	0.475293	5.51301	3.52742e-08	4.47331e-07	2.63641e-07	1.21569e-06
SCARB1	103297	-1.51442	0.274725	-5.51249	3.53801e-08	4.48371e-07	2.64254e-07	1.21948e-06
FOXE1	38.2412	-4.13373	0.749947	-5.51203	3.54726e-08	4.49239e-07	2.64766e-07	1.2228e-06
APOBEC3G	275.617	1.81601	0.329472	5.51189	3.55001e-08	4.49286e-07	2.64793e-07	1.22378e-06
TACR1	22.0789	2.34036	0.424642	5.51138	3.56032e-08	4.50287e-07	2.65384e-07	1.22748e-06
ID2	5410.87	-1.23587	0.224269	-5.51064	3.57537e-08	4.51887e-07	2.66326e-07	1.23288e-06
ADRB2	33.2375	1.61306	0.292752	5.50997	3.58891e-08	4.53293e-07	2.67155e-07	1.23774e-06
NGDN	1210.8	-0.578521	0.105012	-5.50908	3.60716e-08	4.55292e-07	2.68333e-07	1.2443e-06
ITGA3	5116.75	1.67032	0.303211	5.50876	3.6136e-08	4.55799e-07	2.68632e-07	1.24661e-06
NPAS1	104.543	-2.07064	0.376022	-5.50671	3.656e-08	4.60837e-07	2.71601e-07	1.26186e-06
MARCHF4	18.7216	-1.94521	0.353309	-5.50569	3.67724e-08	4.63204e-07	2.72996e-07	1.26951e-06
CA12	311.601	2.38383	0.433044	5.50482	3.69549e-08	4.65192e-07	2.74168e-07	1.27609e-06
CREG1	4289.14	1.02454	0.186134	5.50431	3.70627e-08	4.66235e-07	2.74783e-07	1.27998e-06
CLCN2	1105.95	-1.36263	0.247679	-5.50158	3.76397e-08	4.73178e-07	2.78875e-07	1.30082e-06
UCHL3	503.02	-0.945943	0.17195	-5.50128	3.77041e-08	4.7367e-07	2.79165e-07	1.30315e-06
HLA-F	2494.56	1.40988	0.256319	5.50049	3.78745e-08	4.75494e-07	2.80239e-07	1.30931e-06
SAFB2	3527.4	-0.555743	0.101062	-5.49905	3.8185e-08	4.79071e-07	2.82348e-07	1.32056e-06
SYNGR4	12.428	-2.10871	0.383513	-5.49841	3.83221e-08	4.80471e-07	2.83173e-07	1.32553e-06
MVD	8397.61	-1.79095	0.325798	-5.49712	3.86043e-08	4.83686e-07	2.85067e-07	1.33576e-06
SLC16A8	84.7951	-2.24581	0.408575	-5.49669	3.86982e-08	4.8454e-07	2.85571e-07	1.33917e-06
SIGLEC14	50.7963	1.81828	0.330852	5.49576	3.89027e-08	4.86776e-07	2.86889e-07	1.34659e-06
EXTL1	91.0908	1.59315	0.289917	5.49518	3.90309e-08	4.88055e-07	2.87642e-07	1.35125e-06
SNCA	632.688	2.42066	0.440641	5.4935	3.94049e-08	4.92404e-07	2.90206e-07	1.36486e-06
AOC2	83.17	-1.44433	0.262957	-5.49263	3.95988e-08	4.94498e-07	2.9144e-07	1.37192e-06
VAMP5	1706.42	1.31389	0.239223	5.4923	3.96723e-08	4.95087e-07	2.91787e-07	1.37459e-06
INTS9	1139.73	0.703455	0.128088	5.49198	3.9746e-08	4.95677e-07	2.92135e-07	1.37728e-06
HLCS	1095.27	-0.743722	0.135439	-5.49121	3.99198e-08	4.97515e-07	2.93218e-07	1.38362e-06
SYT3	96.6811	-2.1225	0.386577	-5.49049	4.00828e-08	4.99216e-07	2.9422e-07	1.38956e-06
COL6A1	10771.5	1.42504	0.259701	5.48723	4.08297e-08	5.0818e-07	2.99504e-07	1.41685e-06
ANO10	1112.26	0.741966	0.135253	5.48576	4.11702e-08	5.1208e-07	3.01802e-07	1.42932e-06
RFX8	15.0779	1.71974	0.313677	5.48252	4.19311e-08	5.212e-07	3.07177e-07	1.45723e-06
PFKFB2	998.753	1.37358	0.250574	5.48174	4.21153e-08	5.23143e-07	3.08322e-07	1.464e-06
EFCAB7	265.468	0.695571	0.126897	5.48137	4.22048e-08	5.23908e-07	3.08773e-07	1.46729e-06
RBM19	3476.47	0.995828	0.181699	5.48066	4.23753e-08	5.25331e-07	3.09612e-07	1.47356e-06
DPYSL5	46.0366	-3.69863	0.674842	-5.48073	4.23576e-08	5.25331e-07	3.09612e-07	1.47291e-06
TMEM53	886.439	1.00072	0.182673	5.47821	4.2964e-08	5.32278e-07	3.13706e-07	1.49524e-06
CLCF1	86.9511	2.343	0.428028	5.47395	4.40116e-08	5.44898e-07	3.21144e-07	1.53393e-06
ABCB1	7017.47	-1.59072	0.290637	-5.47324	4.4189e-08	5.46733e-07	3.22225e-07	1.54049e-06
IL15RA	320.453	1.37022	0.250511	5.46972	4.50747e-08	5.57325e-07	3.28468e-07	1.57333e-06
JAKMIP3	172.083	-1.63238	0.298593	-5.46692	4.57935e-08	5.6584e-07	3.33486e-07	1.60006e-06
SFTPB	22.8082	2.77987	0.508564	5.46611	4.60028e-08	5.68053e-07	3.3479e-07	1.60785e-06
CCNB1IP1	1455.41	-0.91195	0.166883	-5.46462	4.63896e-08	5.72453e-07	3.37384e-07	1.62227e-06
RAB4A	1212.89	-0.828616	0.151654	-5.46384	4.65936e-08	5.74593e-07	3.38645e-07	1.62988e-06
C6orf15	3.57709	5.09487	0.932656	5.46275	4.68811e-08	5.77759e-07	3.40511e-07	1.64061e-06
CCDC92	1965.37	0.736434	0.134813	5.46262	4.69149e-08	5.77797e-07	3.40533e-07	1.64187e-06
IP6K3	12.1718	4.03228	0.738196	5.46234	4.69908e-08	5.78353e-07	3.40861e-07	1.64471e-06
PLCL2	1501.95	-1.60144	0.293271	-5.46061	4.7451e-08	5.83635e-07	3.43974e-07	1.66192e-06
TBXA2R	1051.33	-1.86895	0.342425	-5.45799	4.81542e-08	5.91285e-07	3.48483e-07	1.68826e-06
FILIP1	136.559	0.974433	0.178533	5.45799	4.81546e-08	5.91285e-07	3.48483e-07	1.68828e-06
ENAM	30.1464	3.48536	0.638585	5.45795	4.81674e-08	5.91285e-07	3.48483e-07	1.68875e-06
CXCL1	16.8981	2.8499	0.522174	5.45776	4.82188e-08	5.9153e-07	3.48627e-07	1.69068e-06
NEUROG2	36.9961	-2.80037	0.513379	-5.45479	4.90306e-08	6.01097e-07	3.54265e-07	1.72118e-06
BEST4	40.8127	-1.74547	0.320055	-5.45367	4.93394e-08	6.04488e-07	3.56264e-07	1.73279e-06
PTGER4	107.453	1.65732	0.303949	5.45261	4.96369e-08	6.07736e-07	3.58179e-07	1.744e-06
LDLR	31020.6	-1.73509	0.318337	-5.45048	5.02344e-08	6.14651e-07	3.62254e-07	1.76653e-06
HSPB7	3817.92	2.25087	0.413156	5.44801	5.09373e-08	6.22847e-07	3.67084e-07	1.79309e-06
OLFM2	6369.7	-1.6855	0.309405	-5.44754	5.10715e-08	6.24081e-07	3.67812e-07	1.79817e-06
HBQ1	9.27789	-3.06937	0.563537	-5.44661	5.13375e-08	6.26925e-07	3.69488e-07	1.80824e-06
TMCO6	613.949	0.80952	0.148758	5.44186	5.27279e-08	6.43485e-07	3.79248e-07	1.86101e-06
MET	477.38	1.70818	0.31403	5.43953	5.34205e-08	6.51515e-07	3.8398e-07	1.88738e-06
JAK1	3699.69	0.694319	0.127685	5.43773	5.39622e-08	6.57695e-07	3.87622e-07	1.90803e-06
CALM2	19307	-0.514324	0.0945944	-5.43715	5.4141e-08	6.59446e-07	3.88655e-07	1.91486e-06
DDX39A	3460.54	-0.909896	0.167386	-5.43593	5.45116e-08	6.63198e-07	3.90866e-07	1.92902e-06
CD300A	211.31	1.48185	0.272605	5.4359	5.45196e-08	6.63198e-07	3.90866e-07	1.92932e-06
TAFA4	3758.24	-2.4487	0.450657	-5.43363	5.52183e-08	6.71263e-07	3.95619e-07	1.95606e-06
DAB2	13659.4	-1.36546	0.251348	-5.43255	5.5554e-08	6.74907e-07	3.97767e-07	1.96892e-06
AC013470.2	4.00003	-3.51072	0.646743	-5.4283	5.68919e-08	6.90714e-07	4.07083e-07	2.02031e-06
DCLK1	190.552	2.00318	0.369186	5.42594	5.76503e-08	6.9947e-07	4.12243e-07	2.04952e-06
STKLD1	128.656	1.47784	0.272429	5.42468	5.80589e-08	7.03974e-07	4.14898e-07	2.06528e-06
CCL17	7.81091	2.25411	0.41558	5.424	5.82797e-08	7.06196e-07	4.16207e-07	2.07381e-06
PITX1	680.115	-2.44104	0.4501	-5.42333	5.84988e-08	7.08128e-07	4.17346e-07	2.08227e-06
TMEM237	1250.91	-0.915867	0.168877	-5.42328	5.85146e-08	7.08128e-07	4.17346e-07	2.08288e-06
P2RY11	416.743	-1.04888	0.193465	-5.42155	5.90836e-08	7.14554e-07	4.21133e-07	2.10489e-06
DCUN1D5	765.56	-0.85097	0.156981	-5.42086	5.93114e-08	7.16848e-07	4.22485e-07	2.11371e-06
REM2	15.3558	-1.35119	0.249288	-5.42019	5.95365e-08	7.18644e-07	4.23544e-07	2.12243e-06
ZNF107	526.896	-0.835449	0.154136	-5.4202	5.95316e-08	7.18644e-07	4.23544e-07	2.12224e-06
CTNNAL1	8925.59	-1.07986	0.199237	-5.42	5.96006e-08	7.18957e-07	4.23728e-07	2.12492e-06
MUC5B	7.51307	-2.20749	0.407409	-5.41836	6.0148e-08	7.25094e-07	4.27345e-07	2.14614e-06
MROH1	2832.38	0.772546	0.142584	5.41818	6.02088e-08	7.25361e-07	4.27503e-07	2.1485e-06
SEC61B	4818.77	-0.613864	0.113322	-5.41698	6.0613e-08	7.29763e-07	4.30097e-07	2.1642e-06
GOLT1A	54.4444	3.29662	0.608896	5.41409	6.16018e-08	7.40719e-07	4.36554e-07	2.20267e-06
OLIG1	42.1042	-2.33664	0.431584	-5.4141	6.15984e-08	7.40719e-07	4.36554e-07	2.20254e-06
SRRT	4243.26	-0.477029	0.0881235	-5.41318	6.19143e-08	7.44e-07	4.38488e-07	2.21485e-06
GREB1L	503.771	-1.94204	0.358888	-5.41128	6.25748e-08	7.51457e-07	4.42882e-07	2.24062e-06
ACSL4	7032.49	1.04635	0.193416	5.40984	6.30826e-08	7.57071e-07	4.46191e-07	2.26047e-06
SEC23IP	1649.73	-0.568349	0.105085	-5.40844	6.35745e-08	7.62488e-07	4.49384e-07	2.27971e-06
ZNF473	569.416	-0.744211	0.137614	-5.40794	6.3753e-08	7.63654e-07	4.50071e-07	2.2867e-06
DPH7	1152.02	-0.743835	0.137542	-5.40805	6.37148e-08	7.63654e-07	4.50071e-07	2.28521e-06
TRIM7	145.471	-1.64506	0.30422	-5.40747	6.39203e-08	7.6517e-07	4.50965e-07	2.29325e-06
HRCT1	70.3897	1.85973	0.344047	5.40546	6.46423e-08	7.73321e-07	4.55768e-07	2.32157e-06
ITGA5	7872.38	1.53661	0.284403	5.40294	6.55573e-08	7.83769e-07	4.61926e-07	2.35752e-06
SUSD2	490.109	2.06614	0.38243	5.40267	6.56564e-08	7.84455e-07	4.6233e-07	2.36142e-06
PLPPR3	8.34588	-2.81532	0.521294	-5.40063	6.64065e-08	7.92912e-07	4.67314e-07	2.39096e-06
CHRNA7	157.393	-3.22933	0.598324	-5.3973	6.7652e-08	8.07271e-07	4.75777e-07	2.44012e-06
RCAN3	180.755	1.63248	0.302482	5.39694	6.77884e-08	8.08386e-07	4.76434e-07	2.44551e-06
CCL16	6.36513	1.96401	0.363947	5.39641	6.79871e-08	8.1024e-07	4.77527e-07	2.45337e-06
ZNF728	11.1471	3.72043	0.689494	5.39589	6.81836e-08	8.12068e-07	4.78604e-07	2.46114e-06
TCTEX1D1	16.2301	1.69719	0.31454	5.39577	6.82299e-08	8.12105e-07	4.78626e-07	2.46298e-06
ATG7	1012.43	0.64297	0.119235	5.39248	6.94922e-08	8.26605e-07	4.87172e-07	2.51301e-06
TRPM6	42.1111	-1.90219	0.352801	-5.39169	6.97985e-08	8.29724e-07	4.8901e-07	2.52517e-06
PAPOLA	7791.47	-0.493566	0.091554	-5.39098	7.00747e-08	8.32481e-07	4.90635e-07	2.53614e-06
PLPP4	109.855	3.13816	0.582293	5.38931	7.07283e-08	8.39184e-07	4.94586e-07	2.56214e-06
TRAPPC2B	644.461	-0.827206	0.153489	-5.38936	7.07078e-08	8.39184e-07	4.94586e-07	2.56132e-06
SGSM1	226.793	-1.60992	0.298789	-5.38814	7.11902e-08	8.44131e-07	4.97501e-07	2.58053e-06
CARHSP1	6720.91	0.901402	0.16732	5.38731	7.15204e-08	8.47513e-07	4.99494e-07	2.59369e-06
RIMS3	244.339	-1.57691	0.292798	-5.38565	7.21853e-08	8.54852e-07	5.0382e-07	2.62022e-06
S100A11	6912.19	1.60482	0.298014	5.38504	7.2429e-08	8.57198e-07	5.05203e-07	2.62995e-06
BIRC3	237.954	1.29963	0.241411	5.38346	7.30672e-08	8.64207e-07	5.09333e-07	2.65546e-06
ERG28	7867.75	-1.31805	0.244883	-5.38236	7.35161e-08	8.68508e-07	5.11868e-07	2.67342e-06
SLC26A6	805.444	-1.31633	0.244565	-5.38234	7.35232e-08	8.68508e-07	5.11868e-07	2.67371e-06
ABCC5	2006.42	-0.761416	0.141472	-5.3821	7.36233e-08	8.68598e-07	5.11921e-07	2.67772e-06
ETNK2	3922.32	1.96429	0.364964	5.38214	7.36035e-08	8.68598e-07	5.11921e-07	2.67692e-06
PSG9	17.6196	3.34044	0.62075	5.3813	7.39488e-08	8.71891e-07	5.13862e-07	2.69076e-06
RAC2	800.853	2.14975	0.399554	5.38038	7.43306e-08	8.75819e-07	5.16177e-07	2.70606e-06
MLF1	741.968	-1.08399	0.201475	-5.38027	7.43752e-08	8.75819e-07	5.16177e-07	2.70785e-06
LPA	43.981	-3.27193	0.60828	-5.37899	7.49042e-08	8.81497e-07	5.19523e-07	2.72908e-06
SNRNP70	8861.1	-0.593191	0.110299	-5.37801	7.53147e-08	8.85773e-07	5.22044e-07	2.74557e-06
ADCY4	226.091	1.01697	0.189105	5.37779	7.54055e-08	8.86286e-07	5.22346e-07	2.74922e-06
CGRRF1	536.851	-0.785685	0.146114	-5.37721	7.56486e-08	8.88383e-07	5.23582e-07	2.75899e-06
VMO1	85.1385	1.61204	0.299795	5.37714	7.56785e-08	8.88383e-07	5.23582e-07	2.7602e-06
THBD	639.049	1.34645	0.250461	5.37586	7.62186e-08	8.94165e-07	5.2699e-07	2.78193e-06
CYB5RL	105.663	0.989989	0.184251	5.37304	7.74198e-08	9.07691e-07	5.34961e-07	2.83035e-06
CYP2A6	56.5098	2.26837	0.422241	5.37221	7.77773e-08	9.11313e-07	5.37096e-07	2.84478e-06
ACTB	150421	0.53535	0.099669	5.37128	7.81791e-08	9.14881e-07	5.39199e-07	2.86102e-06
MARCKSL1	4732.21	-1.22667	0.228374	-5.37132	7.81636e-08	9.14881e-07	5.39199e-07	2.86039e-06
PAF1	4293.42	-0.618062	0.115126	-5.36858	7.9357e-08	9.28087e-07	5.46982e-07	2.90868e-06
ZNF385D	39.2331	2.03087	0.378419	5.36673	8.01764e-08	9.37087e-07	5.52286e-07	2.9419e-06
HTR1E	23.9948	-3.72085	0.69338	-5.36626	8.03873e-08	9.38967e-07	5.53394e-07	2.95045e-06
C5AR1	457.843	1.66517	0.310326	5.36588	8.05544e-08	9.40335e-07	5.542e-07	2.95724e-06
H3C8	22.2143	-1.76715	0.329353	-5.36551	8.07209e-08	9.41694e-07	5.55002e-07	2.964e-06
EPHX3	16.3912	1.61812	0.301774	5.36204	8.22875e-08	9.59374e-07	5.65422e-07	3.02772e-06
INPP5E	1038.18	-0.79695	0.148632	-5.36191	8.23446e-08	9.59444e-07	5.65463e-07	3.03004e-06
C9orf135	7.04531	3.52359	0.657241	5.36119	8.26773e-08	9.62715e-07	5.6739e-07	3.0436e-06
TWF2	2381.78	0.758896	0.141557	5.36108	8.27277e-08	9.62715e-07	5.6739e-07	3.04566e-06
MGP	13566.6	1.70368	0.317806	5.36075	8.28774e-08	9.6386e-07	5.68065e-07	3.05176e-06
MAP4K1	156.254	1.0519	0.196274	5.35934	8.35256e-08	9.70798e-07	5.72154e-07	3.07821e-06
PLEKHJ1	3624.21	-0.976346	0.182185	-5.3591	8.36381e-08	9.70904e-07	5.72217e-07	3.0828e-06
DDB1	21814.2	-0.668956	0.124826	-5.3591	8.3636e-08	9.70904e-07	5.72217e-07	3.08272e-06
SHANK2	115.658	-2.78551	0.519818	-5.35863	8.38564e-08	9.72837e-07	5.73356e-07	3.09172e-06
MARCHF5	2226.75	-0.575824	0.107485	-5.35725	8.45002e-08	9.79702e-07	5.77402e-07	3.11803e-06
ACAD10	1754.49	0.71047	0.132629	5.35683	8.46965e-08	9.81373e-07	5.78387e-07	3.12606e-06
IL12RB1	63.9217	1.8201	0.340017	5.35296	8.65252e-08	1.00194e-06	5.90511e-07	3.201e-06
DHX35	570.328	0.560163	0.10465	5.35273	8.66364e-08	1.00261e-06	5.90906e-07	3.20556e-06
NKPD1	38.5449	-1.93532	0.361598	-5.35213	8.69272e-08	1.00536e-06	5.92524e-07	3.2175e-06
STK17A	1887.01	0.784154	0.146532	5.35141	8.72697e-08	1.0087e-06	5.94493e-07	3.23157e-06
RANBP9	1994.6	-0.597553	0.111672	-5.35098	8.748e-08	1.01051e-06	5.95559e-07	3.24021e-06
FAM166C	26.2724	-2.23726	0.418237	-5.34927	8.83117e-08	1.01949e-06	6.00852e-07	3.27443e-06
KLHDC2	1876.72	-0.727519	0.13605	-5.34742	8.92164e-08	1.0293e-06	6.06635e-07	3.3117e-06
SNX16	436.584	0.71552	0.133811	5.34726	8.92979e-08	1.02961e-06	6.06817e-07	3.31506e-06
TNFSF18	9.19215	1.98402	0.371106	5.34623	8.98038e-08	1.03481e-06	6.0988e-07	3.33593e-06
KIF5C	1394.73	-1.93262	0.361523	-5.34577	9.00311e-08	1.03679e-06	6.11049e-07	3.34531e-06
OSBP2	1413.48	1.5556	0.291181	5.34237	9.17404e-08	1.05583e-06	6.22268e-07	3.41598e-06
MYO3B	16.0521	2.21484	0.414799	5.33956	9.31748e-08	1.07168e-06	6.31611e-07	3.47543e-06
CCER2	26.2812	-1.59045	0.298005	-5.33701	9.44934e-08	1.08618e-06	6.40158e-07	3.5302e-06
ALPL	5817.65	-2.2382	0.419427	-5.33633	9.48456e-08	1.08956e-06	6.42151e-07	3.54484e-06
ZMAT4	7.72884	-3.24881	0.609018	-5.33451	9.58049e-08	1.09991e-06	6.4825e-07	3.58478e-06
CCL3L3	63.5149	2.10557	0.394721	5.33434	9.58953e-08	1.10028e-06	6.48465e-07	3.58855e-06
CHRD	396.786	-1.92602	0.361073	-5.33416	9.59877e-08	1.10067e-06	6.48694e-07	3.5924e-06
GPC2	73.8242	-1.30332	0.244357	-5.3337	9.62336e-08	1.10281e-06	6.4996e-07	3.60265e-06
CD163L1	269.32	1.93089	0.362065	5.33299	9.66075e-08	1.10642e-06	6.52087e-07	3.61824e-06
IRGQ	1812	-0.665251	0.124761	-5.33221	9.70267e-08	1.11055e-06	6.54518e-07	3.63573e-06
SGPL1	2219.42	-0.733306	0.137556	-5.33096	9.76959e-08	1.11753e-06	6.58631e-07	3.66368e-06
ADAMDEC1	35.4417	2.74359	0.514738	5.33007	9.81769e-08	1.12235e-06	6.61471e-07	3.68378e-06
PHF6	2100.56	0.82949	0.155655	5.32901	9.87469e-08	1.12818e-06	6.64907e-07	3.70762e-06
RARS2	1529.57	-0.869339	0.163151	-5.32843	9.90653e-08	1.13113e-06	6.66646e-07	3.72095e-06
BAG5	1652.91	-0.618431	0.116081	-5.32758	9.95327e-08	1.13577e-06	6.69384e-07	3.74052e-06
DOK1	710.338	1.19451	0.224262	5.32638	1.00187e-07	1.14255e-06	6.73376e-07	3.76794e-06
SNTB2	2153.11	0.94748	0.177891	5.32618	1.003e-07	1.14314e-06	6.73726e-07	3.77267e-06
PCNX1	4262.71	-0.631275	0.118537	-5.32556	1.00643e-07	1.14635e-06	6.75618e-07	3.78705e-06
RBP3	6.94807	-3.8243	0.718156	-5.32516	1.00864e-07	1.14818e-06	6.76696e-07	3.79635e-06
AGAP1	1526.02	-0.777301	0.145983	-5.32459	1.01182e-07	1.15088e-06	6.78287e-07	3.80969e-06
VEPH1	2120.69	1.99457	0.374602	5.32451	1.01224e-07	1.15088e-06	6.78287e-07	3.81145e-06
CCN5	5693.85	2.16233	0.406325	5.32166	1.02824e-07	1.16837e-06	6.88595e-07	3.87873e-06
UBR1	1115	-0.85665	0.160994	-5.32102	1.0319e-07	1.17181e-06	6.90626e-07	3.89411e-06
CLNK	26.1777	-2.37158	0.44575	-5.32042	1.03525e-07	1.17491e-06	6.92451e-07	3.90824e-06
WFIKKN2	134.264	-3.94624	0.74174	-5.32024	1.03629e-07	1.17538e-06	6.9273e-07	3.91262e-06
DUS3L	1436.86	-0.579755	0.108979	-5.31986	1.03846e-07	1.17594e-06	6.93056e-07	3.92175e-06
CIBAR2	2.56289	3.61298	0.679154	5.31983	1.03866e-07	1.17594e-06	6.93056e-07	3.92259e-06
MAP1A	1241.17	1.46672	0.275702	5.31996	1.03789e-07	1.17594e-06	6.93056e-07	3.91933e-06
TMEM272	8.09314	-2.60069	0.489059	-5.31774	1.05064e-07	1.18879e-06	7.00628e-07	3.97312e-06
DHDH	26.8342	-1.70564	0.320845	-5.31607	1.0603e-07	1.19899e-06	7.06644e-07	4.01392e-06
MIGA2	2231.6	-0.891378	0.167707	-5.31508	1.0661e-07	1.20411e-06	7.09659e-07	4.03846e-06
PPTC7	2206.76	0.755421	0.142127	5.31513	1.0658e-07	1.20411e-06	7.09659e-07	4.03718e-06
ENPP1	463.198	1.55893	0.293335	5.3145	1.06948e-07	1.2072e-06	7.11479e-07	4.05275e-06
TRIM63	8.58817	2.9521	0.555567	5.31368	1.07432e-07	1.21193e-06	7.14272e-07	4.07325e-06
LONRF3	99.3962	-1.5562	0.29299	-5.31146	1.08749e-07	1.22605e-06	7.22589e-07	4.12902e-06
COX7B	6591.11	0.831508	0.156555	5.31127	1.08861e-07	1.22658e-06	7.22904e-07	4.1338e-06
CNKSR2	38.5765	3.08541	0.580972	5.31078	1.09158e-07	1.22919e-06	7.24439e-07	4.14638e-06
EIF3J	2137.52	-0.663494	0.124953	-5.30995	1.09654e-07	1.23403e-06	7.27295e-07	4.16744e-06
FAM78B	110.869	1.55951	0.293734	5.30925	1.1008e-07	1.23808e-06	7.29683e-07	4.18553e-06
ZNF584	688.867	-0.717573	0.135241	-5.3059	1.12118e-07	1.26026e-06	7.42752e-07	4.27224e-06
CEBPZ	2170.75	-0.664351	0.125218	-5.30557	1.12324e-07	1.26182e-06	7.43673e-07	4.28103e-06
DMBX1	33.5251	-3.404	0.641669	-5.30492	1.12724e-07	1.26555e-06	7.45872e-07	4.29805e-06
DLEU7	13.6794	1.82391	0.343855	5.3043	1.13109e-07	1.26911e-06	7.4797e-07	4.31445e-06
PALM	3023.64	1.71807	0.324035	5.30211	1.14472e-07	1.28364e-06	7.56535e-07	4.37263e-06
KRT1	2.79372	4.13662	0.780316	5.30121	1.15039e-07	1.28846e-06	7.59375e-07	4.39685e-06
MS4A4E	12.5102	1.72527	0.325444	5.30127	1.14998e-07	1.28846e-06	7.59375e-07	4.39512e-06
FAM107B	3301.94	-1.57262	0.296706	-5.30025	1.15646e-07	1.29449e-06	7.62926e-07	4.4228e-06
R3HDM1	1024.03	-0.523712	0.0988116	-5.30011	1.15734e-07	1.2947e-06	7.63052e-07	4.42656e-06
CPTP	2171.35	0.68805	0.129825	5.29985	1.15898e-07	1.29577e-06	7.63683e-07	4.4336e-06
TSR2	5289.05	1.03674	0.195727	5.29689	1.17794e-07	1.31618e-06	7.75712e-07	4.51479e-06
SOGA1	6916.47	-0.720011	0.135941	-5.2965	1.18043e-07	1.31819e-06	7.76892e-07	4.52548e-06
C12orf75	1363.85	1.79585	0.339086	5.29617	1.18258e-07	1.3198e-06	7.77843e-07	4.53469e-06
TMEM253	33.8672	-1.33968	0.253007	-5.29503	1.18996e-07	1.32725e-06	7.82233e-07	4.56636e-06
ICOS	7.59606	2.97155	0.561263	5.29439	1.19411e-07	1.33109e-06	7.84496e-07	4.58419e-06
PGR	632.923	-1.69146	0.319499	-5.29409	1.19608e-07	1.33187e-06	7.84958e-07	4.59263e-06
AKNA	635.914	1.09912	0.207613	5.29407	1.19623e-07	1.33187e-06	7.84958e-07	4.5933e-06
CBX2	300.142	-1.6782	0.317004	-5.29395	1.19704e-07	1.33198e-06	7.85025e-07	4.59678e-06
ROPN1B	53.0806	-1.47872	0.279345	-5.29351	1.1999e-07	1.33438e-06	7.86435e-07	4.60907e-06
ARHGAP31	379.417	0.848816	0.160413	5.29143	1.21365e-07	1.34887e-06	7.94975e-07	4.6682e-06
TIMM23B	211.566	-0.646552	0.122197	-5.29106	1.21607e-07	1.35075e-06	7.96086e-07	4.6786e-06
MSH6	3019.95	-0.740803	0.140067	-5.28893	1.23032e-07	1.36578e-06	8.04941e-07	4.74001e-06
UBA7	2164.86	0.761494	0.143989	5.28855	1.23288e-07	1.36782e-06	8.06143e-07	4.75108e-06
RABGGTA	1637.57	-0.521411	0.0986031	-5.28798	1.23675e-07	1.3713e-06	8.08193e-07	4.76775e-06
B3GNTL1	150.606	0.947966	0.17928	5.28764	1.23904e-07	1.37303e-06	8.09215e-07	4.77765e-06
EPB41L1	16553.1	-1.18588	0.224308	-5.28684	1.24449e-07	1.37826e-06	8.12296e-07	4.80119e-06
AZU1	7.56894	-3.13935	0.593998	-5.28512	1.25624e-07	1.39045e-06	8.19482e-07	4.85196e-06
B4GALT5	7243.69	-0.954857	0.180685	-5.28464	1.25951e-07	1.39324e-06	8.21128e-07	4.86608e-06
PIK3C2B	389.323	0.839723	0.158922	5.28388	1.26473e-07	1.39819e-06	8.24046e-07	4.88866e-06
DHCR7	19143.7	-1.51586	0.286908	-5.28344	1.2678e-07	1.40077e-06	8.25562e-07	4.90196e-06
UNC79	227.668	-2.32477	0.440051	-5.28296	1.27112e-07	1.40361e-06	8.27236e-07	4.91632e-06
TSPAN2	22.6914	1.56025	0.295359	5.28256	1.27391e-07	1.40504e-06	8.28084e-07	4.92844e-06
C9orf16	8470.22	-1.29452	0.245053	-5.28263	1.27344e-07	1.40504e-06	8.28084e-07	4.92638e-06
MLKL	284.776	1.08782	0.206014	5.28033	1.28952e-07	1.42142e-06	8.37736e-07	4.99609e-06
GALNT7	1041.37	1.26369	0.239441	5.27767	1.30835e-07	1.44134e-06	8.49474e-07	5.07788e-06
RARA	1097.84	0.842392	0.15965	5.27648	1.31687e-07	1.44987e-06	8.545e-07	5.11489e-06
HIPK4	13.6687	-1.34767	0.255498	-5.27466	1.33e-07	1.46347e-06	8.62515e-07	5.17205e-06
ALDH1B1	1490.16	-0.990106	0.187735	-5.27394	1.33523e-07	1.46836e-06	8.65402e-07	5.19484e-06
KLF6	3220.1	-1.0827	0.205341	-5.27267	1.34452e-07	1.47771e-06	8.70912e-07	5.23533e-06
G6PD	7400.38	1.10063	0.208785	5.27162	1.35225e-07	1.48534e-06	8.75405e-07	5.26904e-06
HEATR3	1149.61	-0.651667	0.123636	-5.27084	1.35804e-07	1.49083e-06	8.78645e-07	5.29436e-06
BCL2A1	37.3854	2.05054	0.38926	5.26779	1.38076e-07	1.51488e-06	8.92819e-07	5.39364e-06
SLC29A1	5739.29	1.3711	0.260307	5.26725	1.38485e-07	1.51848e-06	8.94941e-07	5.41154e-06
C19orf71	64.8981	-1.13163	0.214859	-5.26685	1.38785e-07	1.52089e-06	8.96361e-07	5.4247e-06
SDCBP	12171.3	0.735031	0.139567	5.26652	1.39037e-07	1.52188e-06	8.96942e-07	5.43573e-06
DISC1	167.058	1.00658	0.191128	5.26652	1.39035e-07	1.52188e-06	8.96942e-07	5.43563e-06
CD200	256.618	1.33657	0.253799	5.26625	1.39236e-07	1.52316e-06	8.97699e-07	5.44442e-06
JAK3	1671.81	1.55749	0.295756	5.26613	1.39333e-07	1.52334e-06	8.97803e-07	5.44868e-06
TWSG1	2302.37	-1.21213	0.230208	-5.26535	1.39925e-07	1.52893e-06	9.01097e-07	5.47464e-06
MPP1	2250.15	0.857884	0.163012	5.2627	1.41953e-07	1.55018e-06	9.13621e-07	5.56356e-06
ITGB4	187.842	1.35195	0.256975	5.26103	1.4325e-07	1.56344e-06	9.21439e-07	5.62057e-06
OOEP	19.5466	-4.5748	0.869993	-5.25843	1.45287e-07	1.58475e-06	9.33995e-07	5.71015e-06
WIPF1	1165.5	1.09581	0.20846	5.2567	1.46663e-07	1.59883e-06	9.42292e-07	5.77075e-06
APLNR	468.467	1.87519	0.356756	5.25623	1.47035e-07	1.60196e-06	9.4414e-07	5.78718e-06
KRTDAP	3.2441	-3.57713	0.680763	-5.25459	1.48356e-07	1.61541e-06	9.52068e-07	5.84543e-06
PRKCG	6.48205	-3.593	0.6838	-5.25446	1.4846e-07	1.61561e-06	9.52182e-07	5.85001e-06
IL7	47.4996	1.58037	0.300781	5.25421	1.48662e-07	1.61687e-06	9.52925e-07	5.85892e-06
DAD1	6421.24	-0.645637	0.122938	-5.25173	1.50679e-07	1.63786e-06	9.65298e-07	5.94804e-06
BMP1	2687.72	-1.29372	0.246374	-5.25106	1.51228e-07	1.64288e-06	9.68253e-07	5.9723e-06
BMP6	332.978	-1.80512	0.343813	-5.25029	1.51863e-07	1.64882e-06	9.71756e-07	6.00039e-06
LAMP5	717.478	-3.60461	0.686613	-5.24983	1.52236e-07	1.65023e-06	9.72585e-07	6.0169e-06
SYNGR3	173.911	-2.44589	0.465897	-5.24986	1.52213e-07	1.65023e-06	9.72585e-07	6.01588e-06
SMAD2	3721.16	-0.69668	0.132706	-5.24981	1.52256e-07	1.65023e-06	9.72585e-07	6.01778e-06
GSC	21.9216	-2.40258	0.457749	-5.24868	1.5319e-07	1.6594e-06	9.77993e-07	6.05917e-06
TMEM230	8480.2	0.697411	0.132879	5.24845	1.53385e-07	1.66055e-06	9.78671e-07	6.06779e-06
PCSK2	146.423	3.57269	0.680934	5.24675	1.54802e-07	1.67492e-06	9.87142e-07	6.13058e-06
CDC123	2375.8	-0.541722	0.103261	-5.24615	1.55309e-07	1.67887e-06	9.89465e-07	6.15306e-06
RESF1	1117.08	0.81546	0.155441	5.24611	1.55345e-07	1.67887e-06	9.89465e-07	6.15466e-06
ALOXE3	23.8932	2.20505	0.420334	5.24595	1.55482e-07	1.67938e-06	9.89768e-07	6.16074e-06
DLL3	40.7251	-2.47452	0.47198	-5.24285	1.58115e-07	1.70586e-06	1.00537e-06	6.27765e-06
BATF2	112.281	1.31658	0.251116	5.24292	1.58055e-07	1.70586e-06	1.00537e-06	6.27502e-06
GPR150	53.863	2.12832	0.405987	5.24233	1.5856e-07	1.70968e-06	1.00763e-06	6.29744e-06
GIPC1	5178.05	-0.535344	0.102137	-5.24143	1.59335e-07	1.71706e-06	1.01197e-06	6.33194e-06
HOXC11	84.5318	-3.719	0.709583	-5.24111	1.59614e-07	1.71907e-06	1.01316e-06	6.34432e-06
CREBZF	2003.94	-0.607752	0.116021	-5.2383	1.6206e-07	1.74442e-06	1.0281e-06	6.45324e-06
CLC	7.25578	-3.04019	0.580487	-5.23731	1.62931e-07	1.75279e-06	1.03303e-06	6.49207e-06
WDFY3	2458.73	-0.783807	0.14967	-5.2369	1.63296e-07	1.75572e-06	1.03476e-06	6.50838e-06
C6orf201	11.9173	-1.13031	0.215869	-5.23606	1.64039e-07	1.76269e-06	1.03887e-06	6.54149e-06
ALB	124.991	2.30603	0.440552	5.23441	1.65514e-07	1.77651e-06	1.04701e-06	6.60734e-06
CYP4X1	34.1605	1.25741	0.24022	5.23443	1.65498e-07	1.77651e-06	1.04701e-06	6.60665e-06
KLHL31	247.346	1.9906	0.380301	5.23427	1.65641e-07	1.77686e-06	1.04722e-06	6.61303e-06
F3	1089.63	1.56221	0.298553	5.23259	1.67147e-07	1.79199e-06	1.05614e-06	6.68032e-06
PRMT5	1463.56	-0.912533	0.174424	-5.23169	1.6797e-07	1.79979e-06	1.06073e-06	6.71712e-06
PIK3R5	203.731	1.33752	0.255664	5.23154	1.68101e-07	1.80017e-06	1.06095e-06	6.72299e-06
CRAMP1	630.178	-0.55121	0.105368	-5.23129	1.68334e-07	1.80164e-06	1.06182e-06	6.73342e-06
SPEF2	782.747	1.31075	0.250593	5.23058	1.68978e-07	1.8075e-06	1.06528e-06	6.76223e-06
JUP	1507.02	0.991111	0.189489	5.23043	1.69117e-07	1.80796e-06	1.06555e-06	6.76847e-06
FN3K	3999.41	1.06267	0.203176	5.23031	1.69222e-07	1.80805e-06	1.0656e-06	6.77317e-06
CA8	543.349	2.92456	0.559183	5.23006	1.69457e-07	1.80953e-06	1.06647e-06	6.78366e-06
RIN2	1113.19	0.993085	0.189901	5.22947	1.69994e-07	1.81423e-06	1.06924e-06	6.8077e-06
AMH	421.896	-2.12154	0.405757	-5.2286	1.70798e-07	1.82178e-06	1.0737e-06	6.84375e-06
KLF14	69.7711	-2.38366	0.455973	-5.22764	1.71684e-07	1.83019e-06	1.07865e-06	6.88346e-06
MRPS11	1624.64	-0.663437	0.126947	-5.22609	1.73133e-07	1.84459e-06	1.08714e-06	6.94842e-06
HLA-DOA	396.846	1.9123	0.365928	5.22589	1.73319e-07	1.84552e-06	1.08769e-06	6.95676e-06
PTP4A1	15411.9	-0.983846	0.188305	-5.22474	1.74405e-07	1.85604e-06	1.09388e-06	7.00551e-06
ERH	4155.35	-0.613202	0.117408	-5.22285	1.76194e-07	1.87401e-06	1.10448e-06	7.08588e-06
TAS1R3	231.375	1.87617	0.359366	5.22079	1.78166e-07	1.89358e-06	1.11601e-06	7.17457e-06
IL17D	115.629	-1.46331	0.280289	-5.22071	1.78235e-07	1.89358e-06	1.11601e-06	7.17767e-06
TIMM17A	2638.15	-0.819359	0.157002	-5.21878	1.80107e-07	1.91239e-06	1.1271e-06	7.26195e-06
KCNH3	1039.26	-1.8835	0.361184	-5.21479	1.84025e-07	1.95288e-06	1.15096e-06	7.43859e-06
GRN	13351.3	0.869381	0.166728	5.21436	1.84453e-07	1.95633e-06	1.15299e-06	7.45792e-06
DTHD1	3.84542	2.57396	0.493826	5.21229	1.86526e-07	1.9772e-06	1.16529e-06	7.55157e-06
RRAS	1912.17	1.10777	0.212566	5.21141	1.87406e-07	1.98541e-06	1.17013e-06	7.59133e-06
CHP1	6446.38	-0.636213	0.122102	-5.21049	1.88343e-07	1.99374e-06	1.17504e-06	7.63367e-06
PLCG2	1150.87	-1.51468	0.290702	-5.21043	1.88405e-07	1.99374e-06	1.17504e-06	7.6365e-06
ADAMTS8	10.0764	1.60775	0.308678	5.20848	1.90391e-07	2.01362e-06	1.18676e-06	7.72637e-06
NAT14	1354.38	-1.29105	0.247983	-5.20622	1.92724e-07	2.03716e-06	1.20063e-06	7.83207e-06
SHISA8	314.128	-2.88602	0.554364	-5.20599	1.92962e-07	2.03852e-06	1.20143e-06	7.84284e-06
TUBB4A	29182.4	-1.47323	0.283151	-5.20296	1.96134e-07	2.07087e-06	1.2205e-06	7.98671e-06
ABI3	311.463	1.05731	0.203266	5.2016	1.97584e-07	2.085e-06	1.22883e-06	8.05256e-06
MALL	11.8007	1.53849	0.295786	5.20137	1.97826e-07	2.08638e-06	1.22964e-06	8.06353e-06
SLC25A39	9681.49	-0.687162	0.132131	-5.20061	1.98634e-07	2.09373e-06	1.23397e-06	8.10025e-06
HOMEZ	649.29	-0.779535	0.149912	-5.19993	1.99359e-07	2.1002e-06	1.23779e-06	8.13323e-06
MEX3A	128.062	-1.60469	0.308624	-5.19949	1.99831e-07	2.10399e-06	1.24002e-06	8.15468e-06
VWA7	33.5368	1.89681	0.364855	5.19881	2.00569e-07	2.11058e-06	1.2439e-06	8.18824e-06
BAHCC1	970.875	-1.93865	0.373115	-5.19585	2.03783e-07	2.1432e-06	1.26313e-06	8.3345e-06
KIF5B	7463.25	-0.649424	0.125	-5.19538	2.04297e-07	2.1474e-06	1.2656e-06	8.3579e-06
SYMPK	4965.18	-0.638882	0.122986	-5.19477	2.04978e-07	2.15336e-06	1.26911e-06	8.38892e-06
TNNC1	17.7035	-1.64764	0.317239	-5.19368	2.06172e-07	2.1647e-06	1.2758e-06	8.44337e-06
WNT10B	38.6428	-2.43825	0.469647	-5.19167	2.08416e-07	2.18703e-06	1.28896e-06	8.54568e-06
DACH2	57.8724	4.16507	0.80238	5.19089	2.09289e-07	2.19497e-06	1.29364e-06	8.58553e-06
FBP2	19.5405	3.35632	0.646969	5.18776	2.12834e-07	2.23089e-06	1.31481e-06	8.74739e-06
ZNF574	1041.64	-0.548262	0.105716	-5.18617	2.14667e-07	2.24886e-06	1.3254e-06	8.83122e-06
ZBED2	2.92593	3.03059	0.584842	5.1819	2.19642e-07	2.2997e-06	1.35536e-06	9.0589e-06
SRGN	2407.16	1.36596	0.263644	5.18108	2.20611e-07	2.30855e-06	1.36058e-06	9.10328e-06
MUC15	101.539	-6.33654	1.22325	-5.18007	2.21808e-07	2.31979e-06	1.3672e-06	9.15816e-06
TMEM140	1394.84	1.04258	0.201302	5.17922	2.22818e-07	2.32905e-06	1.37266e-06	9.20445e-06
COL18A1	8088.38	-1.0328	0.199562	-5.17531	2.27529e-07	2.37697e-06	1.4009e-06	9.42063e-06
THEM6	1899.52	0.809907	0.156595	5.17199	2.31616e-07	2.41699e-06	1.42449e-06	9.60845e-06
DCDC2C	2.13302	-3.75678	0.726361	-5.17205	2.31536e-07	2.41699e-06	1.42449e-06	9.60478e-06
LAGE3	2174.31	0.805856	0.155821	5.17169	2.31987e-07	2.41951e-06	1.42597e-06	9.62548e-06
GSDME	2394.51	1.78748	0.345664	5.17113	2.32677e-07	2.42536e-06	1.42942e-06	9.65721e-06
TMIGD3	422.799	1.45393	0.281196	5.17051	2.33456e-07	2.43213e-06	1.43341e-06	9.69304e-06
UBE2G2	3310.41	-0.623354	0.120564	-5.17033	2.33677e-07	2.43309e-06	1.43398e-06	9.70323e-06
PRR15	393.216	-2.59543	0.502115	-5.169	2.35351e-07	2.44916e-06	1.44345e-06	9.78027e-06
GALNT18	701.19	-1.11708	0.216125	-5.16867	2.35767e-07	2.45078e-06	1.4444e-06	9.7994e-06
MAML3	509.399	-1.03403	0.200055	-5.16873	2.35693e-07	2.45078e-06	1.4444e-06	9.79598e-06
TFR2	350.602	-1.90319	0.368273	-5.16789	2.36751e-07	2.45964e-06	1.44963e-06	9.8447e-06
RUNX3	141.061	1.63178	0.315823	5.16676	2.38188e-07	2.4732e-06	1.45762e-06	9.91087e-06
FDFT1	17168.3	-1.39703	0.270532	-5.16399	2.41737e-07	2.50867e-06	1.47852e-06	1.00744e-05
QRFP	24.1553	-1.63105	0.315969	-5.16207	2.44232e-07	2.53316e-06	1.49296e-06	1.01895e-05
APBA2	305.442	-1.75325	0.33968	-5.16147	2.45015e-07	2.53849e-06	1.49609e-06	1.02256e-05
NELFB	3341.73	-0.624164	0.120927	-5.1615	2.44981e-07	2.53849e-06	1.49609e-06	1.0224e-05
ABHD15	553.217	0.762171	0.147715	5.15974	2.47289e-07	2.56063e-06	1.50915e-06	1.03306e-05
SH3BGRL	7183.94	0.614454	0.119117	5.15841	2.49055e-07	2.5775e-06	1.51909e-06	1.04121e-05
CP	85.3172	2.25381	0.437064	5.1567	2.51336e-07	2.59967e-06	1.53216e-06	1.05175e-05
RAB2A	7027.82	0.590874	0.114605	5.15573	2.52639e-07	2.61171e-06	1.53925e-06	1.05777e-05
NFE2	8.59708	2.1209	0.411511	5.15393	2.55084e-07	2.63554e-06	1.5533e-06	1.06907e-05
CACNA1I	673.645	-1.8089	0.351099	-5.15209	2.57593e-07	2.65864e-06	1.56691e-06	1.08068e-05
TTC3	5391.05	-0.60032	0.11652	-5.15209	2.57602e-07	2.65864e-06	1.56691e-06	1.08072e-05
RHOB	29984	-0.935332	0.181561	-5.15162	2.58249e-07	2.66385e-06	1.56998e-06	1.08372e-05
KCNJ14	86.403	-1.24901	0.242459	-5.15142	2.58515e-07	2.66513e-06	1.57073e-06	1.08495e-05
GAN	323.225	-0.583393	0.113297	-5.14924	2.61542e-07	2.69486e-06	1.58825e-06	1.09896e-05
SPRR1B	140.565	-4.26521	0.828594	-5.14753	2.63941e-07	2.71809e-06	1.60195e-06	1.11007e-05
BCL7A	1229.93	-0.772231	0.150059	-5.14617	2.65853e-07	2.73628e-06	1.61266e-06	1.11893e-05
TOM1L2	4031.44	-0.686682	0.133538	-5.14223	2.71495e-07	2.79282e-06	1.64599e-06	1.14509e-05
SPRY1	1245.71	0.987563	0.192121	5.14031	2.74282e-07	2.81994e-06	1.66197e-06	1.15801e-05
MYLK	753.31	1.06663	0.20751	5.14015	2.74518e-07	2.82082e-06	1.6625e-06	1.15911e-05
PLPP2	1815.24	-2.42967	0.47293	-5.13748	2.78449e-07	2.85965e-06	1.68538e-06	1.17736e-05
ADGRF5	1336.62	0.95561	0.186156	5.13339	2.84571e-07	2.92004e-06	1.72097e-06	1.2058e-05
AKR1B15	14.7222	3.23827	0.630831	5.13334	2.8464e-07	2.92004e-06	1.72097e-06	1.20612e-05
EFNB3	71.2618	-1.99152	0.388022	-5.13249	2.85933e-07	2.93171e-06	1.72785e-06	1.21213e-05
PPM1N	78.6602	1.53628	0.29947	5.12998	2.89768e-07	2.96941e-06	1.75006e-06	1.22996e-05
UMPS	1282.94	-0.644179	0.125588	-5.12932	2.9079e-07	2.97826e-06	1.75528e-06	1.23471e-05
CDC42SE1	3500.67	-0.683381	0.133274	-5.12766	2.93369e-07	3.00303e-06	1.76988e-06	1.24671e-05
ZIC2	79.8196	-2.61244	0.509507	-5.12739	2.93792e-07	3.00573e-06	1.77147e-06	1.24867e-05
HCN4	10.6413	-3.10172	0.605169	-5.12537	2.96952e-07	3.03475e-06	1.78858e-06	1.26338e-05
PADI4	5.06098	2.55722	0.498933	5.12537	2.96947e-07	3.03475e-06	1.78858e-06	1.26336e-05
SHQ1	777.061	0.397639	0.0775938	5.12462	2.98138e-07	3.04522e-06	1.79475e-06	1.2689e-05
TGFBR2	4134.55	1.26576	0.247243	5.11952	3.06321e-07	3.12711e-06	1.84301e-06	1.30701e-05
NMNAT2	318.873	2.62947	0.513682	5.11887	3.07368e-07	3.13608e-06	1.8483e-06	1.31188e-05
CEP89	1362.39	-0.683022	0.133448	-5.11828	3.08337e-07	3.14427e-06	1.85312e-06	1.3164e-05
PAK4	3589.97	-0.611826	0.119628	-5.1144	3.14743e-07	3.20785e-06	1.89059e-06	1.34626e-05
POC5	845.615	-0.611802	0.119654	-5.11307	3.16965e-07	3.22874e-06	1.90291e-06	1.35662e-05
S100A9	247.172	1.9542	0.382261	5.11222	3.18393e-07	3.24153e-06	1.91045e-06	1.36328e-05
TMEM252	24.3344	-2.05432	0.401914	-5.11133	3.19893e-07	3.25504e-06	1.91841e-06	1.37027e-05
MIR9-1HG	6.42273	-1.89464	0.370747	-5.11032	3.21607e-07	3.27072e-06	1.92765e-06	1.37827e-05
GBGT1	897.338	1.75144	0.342824	5.10885	3.24121e-07	3.2945e-06	1.94166e-06	1.38999e-05
KCNG1	294.764	-2.25358	0.441191	-5.10796	3.2566e-07	3.30835e-06	1.94983e-06	1.39718e-05
ZNF521	1654.56	-1.13642	0.222503	-5.10745	3.26538e-07	3.31548e-06	1.95403e-06	1.40127e-05
USPL1	763.87	-0.636578	0.124649	-5.10695	3.274e-07	3.32244e-06	1.95813e-06	1.4053e-05
ABLIM2	1027.35	-1.80356	0.353245	-5.10569	3.29593e-07	3.34289e-06	1.97018e-06	1.41553e-05
FDX1	23024.1	-1.41137	0.276539	-5.1037	3.33084e-07	3.37647e-06	1.98998e-06	1.43183e-05
TTC22	24.0748	2.62971	0.515275	5.10352	3.33401e-07	3.37786e-06	1.99079e-06	1.43331e-05
TNFRSF11A	81.9439	1.20648	0.236437	5.10276	3.34741e-07	3.38961e-06	1.99772e-06	1.43956e-05
SLC2A5	269.088	2.3807	0.466592	5.10232	3.35523e-07	3.39388e-06	2.00023e-06	1.44321e-05
CTNNB1	17363.3	-1.0166	0.199242	-5.10232	3.35522e-07	3.39388e-06	2.00023e-06	1.44321e-05
OSM	62.9027	1.92305	0.376921	5.102	3.36084e-07	3.39772e-06	2.0025e-06	1.44583e-05
IL23R	31.1925	-2.68334	0.526197	-5.09949	3.40578e-07	3.4413e-06	2.02818e-06	1.46682e-05
BIK	233.662	-1.89959	0.372607	-5.0981	3.43074e-07	3.46382e-06	2.04146e-06	1.47847e-05
DUSP16	7950.75	-0.996808	0.195527	-5.09805	3.43175e-07	3.46382e-06	2.04146e-06	1.47895e-05
JHY	30.8888	1.68039	0.329774	5.09558	3.47684e-07	3.50745e-06	2.06717e-06	1.50001e-05
PPARD	2918.46	0.961165	0.188658	5.09476	3.49187e-07	3.52072e-06	2.07499e-06	1.50703e-05
TTLL4	1272.8	1.02144	0.200512	5.09418	3.50253e-07	3.5271e-06	2.07875e-06	1.51201e-05
SURF6	3189.37	-0.696954	0.136813	-5.09422	3.50179e-07	3.5271e-06	2.07875e-06	1.51166e-05
B2M	81373.2	1.06806	0.209665	5.09411	3.50383e-07	3.5271e-06	2.07875e-06	1.51262e-05
AKIRIN2	2174.28	-0.793334	0.15575	-5.09365	3.51244e-07	3.53387e-06	2.08274e-06	1.51663e-05
H2BC13	5.31741	-1.85854	0.36506	-5.09107	3.56045e-07	3.58026e-06	2.11008e-06	1.53907e-05
CPXM1	133.563	2.18181	0.42866	5.08984	3.58373e-07	3.60174e-06	2.12274e-06	1.54995e-05
HSPA14	901.212	-0.549043	0.107882	-5.08931	3.59363e-07	3.60794e-06	2.1264e-06	1.55457e-05
CNGA1	16.0373	1.94894	0.382947	5.08931	3.59374e-07	3.60794e-06	2.1264e-06	1.55462e-05
ANK1	596.533	2.39597	0.47088	5.08828	3.61326e-07	3.62561e-06	2.1368e-06	1.56375e-05
KCNMB1	43.2292	1.29417	0.254355	5.08806	3.61746e-07	3.62788e-06	2.13815e-06	1.56571e-05
ADAM12	177.388	-1.73799	0.341626	-5.08741	3.62992e-07	3.63685e-06	2.14343e-06	1.57153e-05
CCL14	148.44	1.9387	0.38108	5.08739	3.63027e-07	3.63685e-06	2.14343e-06	1.57169e-05
MFGE8	6289.26	1.24132	0.244054	5.08624	3.65229e-07	3.65664e-06	2.1551e-06	1.58199e-05
COL11A2	56.7965	-1.3413	0.263715	-5.08616	3.65392e-07	3.65664e-06	2.1551e-06	1.58275e-05
SOX30	23.6379	-1.81704	0.357262	-5.08601	3.65673e-07	3.65751e-06	2.15561e-06	1.58406e-05
MAN1C1	2445.48	1.35831	0.267088	5.08564	3.66395e-07	3.66279e-06	2.15872e-06	1.58744e-05
NIBAN2	9884.75	1.00312	0.197257	5.08532	3.67001e-07	3.66689e-06	2.16114e-06	1.59027e-05
H3C6	36.7222	-1.38449	0.272285	-5.08471	3.68179e-07	3.6767e-06	2.16692e-06	1.59577e-05
FAM83A	159.137	3.28107	0.645822	5.08046	3.76529e-07	3.75809e-06	2.21488e-06	1.6348e-05
MTARC1	216.25	-1.12154	0.220799	-5.07946	3.78515e-07	3.77591e-06	2.22539e-06	1.64409e-05
PRSS36	142.823	0.989481	0.194825	5.07883	3.79775e-07	3.78647e-06	2.23161e-06	1.64998e-05
LRRC75A	1129.01	-1.24097	0.244363	-5.07838	3.80668e-07	3.79336e-06	2.23567e-06	1.65415e-05
SLC30A2	909.451	2.69861	0.53147	5.07762	3.82192e-07	3.80653e-06	2.24343e-06	1.66127e-05
HLA-A	51731.8	1.16826	0.230093	5.07734	3.82759e-07	3.81016e-06	2.24557e-06	1.66392e-05
TSC22D4	5863.99	0.76843	0.151363	5.07673	3.83976e-07	3.82025e-06	2.25152e-06	1.66961e-05
G0S2	3114.26	2.31036	0.455259	5.07482	3.87856e-07	3.85681e-06	2.27307e-06	1.68775e-05
CNTN5	21.8246	-4.42079	0.871194	-5.0744	3.88722e-07	3.86338e-06	2.27694e-06	1.6918e-05
C2	561.103	1.99201	0.392672	5.07296	3.91669e-07	3.89061e-06	2.29299e-06	1.70557e-05
BCAN	138.767	-1.70312	0.335735	-5.07281	3.91983e-07	3.89167e-06	2.29361e-06	1.70704e-05
IDH1	8839.05	-1.00832	0.198843	-5.07094	3.95864e-07	3.92813e-06	2.3151e-06	1.72518e-05
SLC12A2	2157.46	-1.18672	0.234129	-5.06865	4.00644e-07	3.97346e-06	2.34182e-06	1.74752e-05
DBF4	422.605	-0.806808	0.15918	-5.06854	4.00882e-07	3.97373e-06	2.34197e-06	1.74863e-05
DNAJC16	790.95	-0.462866	0.0913364	-5.06771	4.02632e-07	3.98897e-06	2.35096e-06	1.75681e-05
LSMEM2	10.6487	-2.14238	0.4228	-5.06712	4.03876e-07	3.99918e-06	2.35698e-06	1.76263e-05
TLCD3B	68.6049	-1.88805	0.373048	-5.06114	4.1676e-07	4.12458e-06	2.43088e-06	1.82283e-05
IPO13	2249.88	-0.517485	0.102264	-5.0603	4.18588e-07	4.1405e-06	2.44026e-06	1.83137e-05
WDR3	1267.23	-0.777611	0.153743	-5.05786	4.23997e-07	4.18975e-06	2.46929e-06	1.85664e-05
FKBP3	2300.34	-0.641714	0.126875	-5.05785	4.24013e-07	4.18975e-06	2.46929e-06	1.85671e-05
SDC3	24423.3	1.13381	0.224384	5.05298	4.3498e-07	4.29585e-06	2.53183e-06	1.90793e-05
PRKAB1	3067.57	-0.655956	0.129852	-5.05158	4.38166e-07	4.32505e-06	2.54903e-06	1.9228e-05
GLIS3	224.673	1.92313	0.380722	5.05128	4.38862e-07	4.32965e-06	2.55174e-06	1.92605e-05
XAB2	3774.68	-0.529388	0.104819	-5.0505	4.40654e-07	4.34276e-06	2.55947e-06	1.93442e-05
CDH11	3458.09	-1.9936	0.394725	-5.0506	4.4043e-07	4.34276e-06	2.55947e-06	1.93337e-05
TMEM211	2.80418	-2.83166	0.560919	-5.04825	4.45869e-07	4.39186e-06	2.58841e-06	1.95876e-05
TMC4	183.411	1.43755	0.284775	5.04803	4.4638e-07	4.39458e-06	2.59001e-06	1.96114e-05
RCOR1	1152.66	-0.689094	0.136519	-5.04762	4.47353e-07	4.40186e-06	2.5943e-06	1.96568e-05
SUPT5H	7158.23	-0.468139	0.0927699	-5.04624	4.50593e-07	4.43142e-06	2.61172e-06	1.9808e-05
CAMSAP1	1520.68	-0.657647	0.130338	-5.04572	4.51826e-07	4.44122e-06	2.6175e-06	1.98655e-05
SLC17A8	8.08698	-2.38041	0.471844	-5.04492	4.53722e-07	4.45753e-06	2.62711e-06	1.9954e-05
EIF3M	6574.06	-0.570488	0.113105	-5.04388	4.56181e-07	4.47934e-06	2.63997e-06	2.00687e-05
QRICH2	242.103	-1.40073	0.277762	-5.04292	4.58479e-07	4.49956e-06	2.65188e-06	2.01759e-05
PDE1A	187.176	1.53511	0.304486	5.04164	4.61557e-07	4.5274e-06	2.66829e-06	2.03194e-05
PAPOLB	5.88522	-4.03265	0.800242	-5.03929	4.67257e-07	4.58092e-06	2.69983e-06	2.05851e-05
NFYB	1318.67	0.611985	0.121451	5.03895	4.68089e-07	4.58668e-06	2.70323e-06	2.06239e-05
MAP2	791.942	1.61834	0.321351	5.03604	4.75268e-07	4.65461e-06	2.74326e-06	2.09585e-05
NEDD8-MDP1	8.72492	-1.64222	0.326178	-5.03474	4.78491e-07	4.68373e-06	2.76043e-06	2.11086e-05
GJA5	244.339	1.68249	0.33422	5.03409	4.80127e-07	4.6973e-06	2.76842e-06	2.11848e-05
SHARPIN	4116.98	0.786331	0.156231	5.03313	4.8253e-07	4.71835e-06	2.78083e-06	2.12967e-05
EBF2	93.7228	1.84272	0.366153	5.03265	4.83747e-07	4.72779e-06	2.7864e-06	2.13534e-05
SLITRK5	33.4244	-3.38071	0.671771	-5.03254	4.84034e-07	4.72813e-06	2.7866e-06	2.13667e-05
CBLN4	125.287	2.77999	0.552494	5.03171	4.86117e-07	4.74307e-06	2.7954e-06	2.14637e-05
DIP2A	1301.47	-0.638581	0.126909	-5.03179	4.85916e-07	4.74307e-06	2.7954e-06	2.14543e-05
CHD7	368.839	1.23402	0.245253	5.03163	4.8632e-07	4.74307e-06	2.7954e-06	2.14732e-05
ISM2	30.2996	-2.25711	0.448602	-5.03142	4.86861e-07	4.74589e-06	2.79706e-06	2.14983e-05
UPK3A	1.33256	2.57395	0.511612	5.03106	4.87776e-07	4.75234e-06	2.80086e-06	2.15409e-05
RHCG	3330.86	-3.62414	0.720689	-5.02872	4.93764e-07	4.80819e-06	2.83378e-06	2.18196e-05
ARHGDIG	12.1741	-1.95949	0.389854	-5.02621	5.00259e-07	4.86891e-06	2.86956e-06	2.21217e-05
MMP24OS	3003.47	0.845075	0.168226	5.02345	5.07502e-07	4.93685e-06	2.90961e-06	2.24584e-05
TICRR	163.498	-1.50924	0.300446	-5.02334	5.07796e-07	4.93715e-06	2.90978e-06	2.24721e-05
RAB6C	12.8698	-1.95077	0.388478	-5.02158	5.12482e-07	4.98014e-06	2.93512e-06	2.26899e-05
MDFIC	1397.61	1.17611	0.234277	5.02016	5.16289e-07	5.01454e-06	2.95539e-06	2.28667e-05
PRDM8	19.6921	1.85904	0.370368	5.01943	5.18249e-07	5.03098e-06	2.96508e-06	2.29577e-05
PBDC1	1196.16	-0.495258	0.0986763	-5.01901	5.19382e-07	5.03677e-06	2.9685e-06	2.30103e-05
RFX4	3.16171	2.85185	0.568207	5.01903	5.19318e-07	5.03677e-06	2.9685e-06	2.30074e-05
HSPA13	2037.67	-0.764364	0.152353	-5.01706	5.24686e-07	5.08558e-06	2.99726e-06	2.32565e-05
ELAPOR2	649.011	1.80013	0.358811	5.01694	5.25021e-07	5.0862e-06	2.99763e-06	2.32721e-05
ACTN2	84.2469	-2.6694	0.532112	-5.01661	5.25902e-07	5.09212e-06	3.00112e-06	2.3313e-05
PTPRE	1799.98	-1.33722	0.266627	-5.01533	5.29434e-07	5.12368e-06	3.01972e-06	2.34769e-05
FOXP1	1125.04	0.89028	0.177565	5.01384	5.33543e-07	5.16078e-06	3.04159e-06	2.36675e-05
MYH1	7.08972	-3.65276	0.728863	-5.01159	5.39821e-07	5.21639e-06	3.07436e-06	2.39585e-05
AMDHD2	1290.71	1.03807	0.207133	5.01158	5.39847e-07	5.21639e-06	3.07436e-06	2.39597e-05
SLFN5	1541.87	1.38346	0.276062	5.01142	5.40308e-07	5.21817e-06	3.07541e-06	2.39811e-05
DTX1	944.609	-1.71478	0.342212	-5.01088	5.4183e-07	5.23017e-06	3.08248e-06	2.40516e-05
SLC13A3	757.224	-1.78117	0.355514	-5.01014	5.43902e-07	5.24748e-06	3.09268e-06	2.41477e-05
ACAT2	6040.88	-1.87712	0.374894	-5.00705	5.52701e-07	5.32964e-06	3.1411e-06	2.45552e-05
ARID5A	407.323	0.873993	0.174559	5.00685	5.53288e-07	5.33256e-06	3.14282e-06	2.45824e-05
OR52N4	1.66702	2.64195	0.527679	5.00674	5.53605e-07	5.33288e-06	3.14302e-06	2.45971e-05
XYLB	98.6433	0.928938	0.185579	5.00562	5.56832e-07	5.36122e-06	3.15972e-06	2.47464e-05
EIF4E2	2394.59	-0.584959	0.116865	-5.00544	5.57338e-07	5.36334e-06	3.16096e-06	2.47698e-05
ELMO2	2530.87	0.525371	0.104977	5.00463	5.59688e-07	5.3832e-06	3.17267e-06	2.48786e-05
SPINK6	197.921	-3.12695	0.624897	-5.00394	5.61702e-07	5.39981e-06	3.18246e-06	2.49718e-05
CABP4	15.5822	1.21881	0.243586	5.0036	5.62705e-07	5.40669e-06	3.18651e-06	2.50182e-05
IGF2BP1	74.7022	-3.08889	0.617488	-5.00234	5.66386e-07	5.43928e-06	3.20572e-06	2.51884e-05
MOV10L1	46.608	-2.77778	0.555749	-4.99827	5.78474e-07	5.55253e-06	3.27246e-06	2.5747e-05
ASCL5	17.2172	-1.79045	0.35825	-4.99778	5.7993e-07	5.56366e-06	3.27902e-06	2.58143e-05
BMP2K	284.991	0.950491	0.190217	4.99688	5.82658e-07	5.58698e-06	3.29277e-06	2.59403e-05
PTPN5	25.3776	-2.60598	0.521582	-4.9963	5.84412e-07	5.60094e-06	3.301e-06	2.60212e-05
SNCB	270.64	-2.27716	0.455822	-4.99572	5.8617e-07	5.61206e-06	3.30755e-06	2.61024e-05
OSGIN1	2689.68	-1.20414	0.241032	-4.99578	5.85974e-07	5.61206e-06	3.30755e-06	2.60933e-05
PDIA2	6.75325	-2.10594	0.421699	-4.99395	5.91573e-07	5.66091e-06	3.33634e-06	2.63516e-05
PROB1	274.371	-1.24357	0.249024	-4.99379	5.92066e-07	5.66274e-06	3.33742e-06	2.63744e-05
LILRA2	56.7912	1.46518	0.293497	4.99216	5.9708e-07	5.70779e-06	3.36397e-06	2.66056e-05
POLD2	5590.03	-0.586972	0.117598	-4.99134	5.99631e-07	5.72927e-06	3.37663e-06	2.67232e-05
BLOC1S5-TXNDC5	47.3951	-1.86514	0.373701	-4.991	6.00682e-07	5.73639e-06	3.38083e-06	2.67716e-05
COPS7A	5098.32	0.487611	0.0977333	4.9892	6.06308e-07	5.78718e-06	3.41076e-06	2.70309e-05
SLC35E1	3207.9	-0.662352	0.132772	-4.98865	6.08012e-07	5.8005e-06	3.41861e-06	2.71093e-05
TIMM23	2951.36	-0.529157	0.10608	-4.98829	6.09165e-07	5.80854e-06	3.42335e-06	2.71624e-05
PRL	7.83439	-2.49505	0.500324	-4.98688	6.13636e-07	5.84525e-06	3.44498e-06	2.73683e-05
AC013394.1	67.6266	-1.02696	0.205929	-4.98695	6.13398e-07	5.84525e-06	3.44498e-06	2.73573e-05
RHPN1	959.805	1.48316	0.297451	4.98622	6.15724e-07	5.86217e-06	3.45496e-06	2.74644e-05
ASPHD1	687.681	-1.55242	0.311389	-4.98548	6.18093e-07	5.88174e-06	3.46649e-06	2.75733e-05
CACNA2D2	84.728	-1.32659	0.266101	-4.98528	6.18717e-07	5.8847e-06	3.46823e-06	2.76021e-05
PDZD8	1449.41	-0.761637	0.152784	-4.98504	6.19482e-07	5.889e-06	3.47077e-06	2.76373e-05
SLC30A1	3362.58	-0.928506	0.186274	-4.98462	6.20845e-07	5.89897e-06	3.47665e-06	2.77e-05
AP1S2	856.502	0.865298	0.173598	4.98449	6.2124e-07	5.89974e-06	3.4771e-06	2.77181e-05
CPT1C	397.028	-1.74075	0.34926	-4.9841	6.2252e-07	5.90891e-06	3.4825e-06	2.7777e-05
NUTM2F	2.7938	-3.40456	0.683314	-4.98242	6.27954e-07	5.95748e-06	3.51113e-06	2.80268e-05
OAS2	694.255	1.37145	0.275364	4.98049	6.3424e-07	6.01408e-06	3.54449e-06	2.83156e-05
SELENOI	1697.63	-0.723896	0.145356	-4.98017	6.35271e-07	6.02082e-06	3.54846e-06	2.83629e-05
HNRNPC	15043.1	-0.365159	0.0733245	-4.98005	6.35693e-07	6.02178e-06	3.54903e-06	2.83823e-05
SOCS7	926.699	-0.813107	0.16329	-4.97953	6.37398e-07	6.0349e-06	3.55676e-06	2.84606e-05
C20orf27	1643.71	0.772157	0.155094	4.97865	6.40301e-07	6.05932e-06	3.57115e-06	2.85939e-05
CHRNA5	89.7136	-1.65157	0.331764	-4.97815	6.41961e-07	6.07133e-06	3.57823e-06	2.86701e-05
FUT11	885.996	-0.717552	0.144143	-4.97807	6.42216e-07	6.07133e-06	3.57823e-06	2.86818e-05
NAIP	13.9542	1.15004	0.231051	4.97743	6.44337e-07	6.08832e-06	3.58824e-06	2.87791e-05
ANP32B	5497.22	-0.638193	0.128239	-4.97658	6.47186e-07	6.10909e-06	3.60049e-06	2.89098e-05
ARHGEF35	18.5008	2.65376	0.533245	4.97663	6.47015e-07	6.10909e-06	3.60049e-06	2.8902e-05
LIFR	1644.59	-1.34497	0.270443	-4.97322	6.5851e-07	6.20975e-06	3.65981e-06	2.94289e-05
NRN1	975.059	-2.02989	0.408163	-4.97322	6.585e-07	6.20975e-06	3.65981e-06	2.94285e-05
DYNC1H1	14191.6	-0.49827	0.100197	-4.97292	6.59516e-07	6.21612e-06	3.66356e-06	2.9475e-05
ERMN	3.14886	1.94597	0.391352	4.97244	6.61158e-07	6.22847e-06	3.67084e-06	2.95502e-05
CHSY3	55.7762	1.55234	0.312202	4.97224	6.61828e-07	6.23166e-06	3.67272e-06	2.95809e-05
GYG2	125.534	-2.60981	0.524984	-4.97123	6.65304e-07	6.25812e-06	3.68831e-06	2.974e-05
CFAP61	7.91243	1.75302	0.352631	4.97124	6.65245e-07	6.25812e-06	3.68831e-06	2.97373e-05
[truncated: 17,168 more rows]
